# Supplementary material for: Endothelial EphB4 maintains vascular integrity and transport function in adult heart
Source: eLife. 2019 Nov 29;8:e45863. doi: 10.7554/eLife.45863 (PMC6884395; doi:10.7554/eLife.45863)
Supplement: Figure 1—source data 1. [file elife-45863-fig1-data1.xlsx]

## Sheet: Fig.1
	Figure 1–source data 1
	Source data for Figure 1A, B, C, D.
	Quantitation of heart weight, heart weight / tibia length index (HW/TL), body weight, cardiomyocyte relative area, ejection fraction, LV diastolic and systolic volume, ventricular septum thickness and LV and RV mass in 12 week-old Ephb4 mutants and control mice.
1A	Heart weight (g)			1A	Heart weight (g)/ tibia length (mm)			1A	Body weight (g)
		Control	Ephb4ΔEC			Control	Ephb4ΔEC			Control	Ephb4ΔEC
			0.21				0.0105				28.7
			0.18				0.00857143				28.95
			0.23				0.0109524				26.24
		0.165	0.194			0.00785714	0.00881818			27.12	28.95
		0.16	0.179			0.008	0.00852381			24.6	27.52
		0.177	0.21			0.00842857	0.0105			27.79	24.13
		0.161	0.178			0.00805	0.00936842			24.99	22.25
		0.155	0.178			0.00738095	0.00936842			25.1	25.55
	Table Analyzed	Fig,1 Heart weight (g)			Table Analyzed	Fig,1 HW (g) / TL (mm)			Table Analyzed	Fig,1 Body weight (g)
	Column B	Ephb4ΔEC			Column B	Ephb4ΔEC			Column B	Ephb4ΔEC
	vs.	vs,			vs.	vs,			vs.	vs,
	Column A	Control			Column A	Control			Column A	Control
	Unpaired t test with Welch's correction				Unpaired t test with Welch's correction				Unpaired t test with Welch's correction
	P value	0.0027			P value	0.0016			P value	0.5804
	P value summary	**			P value summary	**			P value summary	ns
	Significantly different (P < 0.05)?	Yes			Significantly different (P < 0.05)?	Yes			Significantly different (P < 0.05)?	No
	One- or two-tailed P value?	Two-tailed			One- or two-tailed P value?	Two-tailed			One- or two-tailed P value?	Two-tailed
	Welch-corrected t, df	t=3,953, df=10,10			Welch-corrected t, df	t=4,322, df=9,874			Welch-corrected t, df	t=0,5697, df=10,99
	Mean of column A	0.1636			Mean of column A	0.007943			Mean of column A	25.92
	Mean of column B	0.1949			Mean of column B	0.009575			Mean of column B	26.54
	Difference between means (B - A) ± SEM	0,03128 ± 0,007912			Difference between means (B - A) ± SEM	0,001632 ± 0,0003776			Difference between means (B - A) ± SEM	0,6163 ± 1,082
	95% confidence interval	0,01367 to 0,04888			95% confidence interval	0,0007892 to 0,002475			95% confidence interval	-1,765 to 2,997
	R squared (eta squared)	0.6075			R squared (eta squared)	0.6542			R squared (eta squared)	0.02868
1B	Cardiomyocyte relative area (µm2)			1C	Ejection fraction (EF) (%)			1C	LV diastolic volume (µl)
		Control	Ephb4ΔEC			Control	Ephb4ΔEC			Control	Ephb4ΔEC
		214.664	292.203			57.949				78.81
		251.374	335.135			53.468				79.94
		257.906	285.652			54.583				70.34
		182.46	358.419			63.318				75.94
						63.573	46.897			52.25	80.34
						56.507	48.153			66.54	78.59
						48.164	54.386			55.66	85.53
						53.887	47.139			60.89	76.88
						67.224	51.592			56.93	79.68
						59.476	55.697			56.47	64.52
	Table Analyzed	Fig,1 CM relative area (µm2)			Table Analyzed	Fig,1 EF			Table Analyzed	Fig,1 LV diastolic volume (µl)
	Column B	Ephb4ΔEC			Column B	Ephb4ΔEC			Column B	Ephb4ΔEC
	vs.	vs,			vs.	vs,			vs.	vs,
	Column A	Control			Column A	Control			Column A	Control
	Unpaired t test with Welch's correction				Unpaired t test with Welch's correction				Unpaired t test with Welch's correction
	P value	0.0102			P value	0.0097			P value	0.0144
	P value summary	*			P value summary	**			P value summary	*
	Significantly different (P < 0.05)?	Yes			Significantly different (P < 0.05)?	Yes			Significantly different (P < 0.05)?	Yes
	One- or two-tailed P value?	Two-tailed			One- or two-tailed P value?	Two-tailed			One- or two-tailed P value?	Two-tailed
	Welch-corrected t, df	t=3,694, df=6,000			Welch-corrected t, df	t=3,003, df=13,71			Welch-corrected t, df	t=2,802, df=13,65
	Mean of column A	226.6			Mean of column A	57.81			Mean of column A	65.38
	Mean of column B	317.9			Mean of column B	50.64			Mean of column B	77.59
	Difference between means (B - A) ± SEM	91,25 ± 24,70			Difference between means (B - A) ± SEM	-7,171 ± 2,388			Difference between means (B - A) ± SEM	12,21 ± 4,358
	95% confidence interval	30,80 to 151,7			95% confidence interval	-12,30 to -2,039			95% confidence interval	2,843 to 21,58
	R squared (eta squared)	0.6946			R squared (eta squared)	0.3967			R squared (eta squared)	0.3652
1C	LV systolic volume (µl)			1D	Ventricular septum thickness (mm)			1D	LV mass (mm3)
		Control	Ephb4ΔEC			Control	Ephb4ΔEC			Control	Ephb4ΔEC
		34.84					1.01				63.6445
		36.84					1.08333				90.084
		32.35				1.25333	0.981667			113.507	90.994
		27.88				1.06	1.03167			100.069	101.595
		19.22	42.28			1.12	1.03167			112.803	82.2335
		28.9	40.24			1.10167	1.02833			105.737	107.198
		28.51	38.81			1.115	1.01333			101.371	84.2475
		28.01	40.55			1.04667	1.01167			90.061	82.273
		18.68	38.91			1.04167	1.09833			82.8035	89.7175
		22.72	28.51			1.135	1.12167			122.427	92.6315
						1.19	1.12333			88.517	87.8025
	Table Analyzed	Fig,1 LV systolic volume (µl)
	Column B	Ephb4ΔEC			Table Analyzed	Fig,1 Ventricular septum thickness (mm)			Table Analyzed	Fig,1 LV mass (mm3)
	vs.	vs,
	Column A	Control			Column B	Ephb4ΔEC			Column B	Ephb4ΔEC
					vs.	vs,			vs.	vs,
	Unpaired t test with Welch's correction				Column A	Control			Column A	Control
	P value	0.0026
	P value summary	**			Unpaired t test with Welch's correction				Unpaired t test with Welch's correction
	Significantly different (P < 0.05)?	Yes			P value	0.0238			P value	0.0266
	One- or two-tailed P value?	Two-tailed			P value summary	*			P value summary	*
	Welch-corrected t, df	t=3,738, df=12,56			Significantly different (P < 0.05)?	Yes			Significantly different (P < 0.05)?	Yes
					One- or two-tailed P value?	Two-tailed			One- or two-tailed P value?	Two-tailed
	Mean of column A	27.8			Welch-corrected t, df	t=2,534, df=14,05			Welch-corrected t, df	t=2,444, df=15,90
	Mean of column B	38.22
	Difference between means (B - A) ± SEM	10,42 ± 2,788			Mean of column A	1.118			Mean of column A	101.9
	95% confidence interval	4,377 to 16,47			Mean of column B	1.049			Mean of column B	88.4
	R squared (eta squared)	0.5266			Difference between means (B - A) ± SEM	-0,06951 ± 0,02743			Difference between means (B - A) ± SEM	-13,52 ± 5,532
					95% confidence interval	-0,1283 to -0,01070			95% confidence interval	-25,25 to -1,786
					R squared (eta squared)	0.3137			R squared (eta squared)	0.273
1D	RV mass (mm3)
		Control	Ephb4ΔEC
			12.6635
			16.271
		19.2325	17.4405
		14.328	20.6105
		20.51	15.304
		19.453	20.571
		22.4405	14.8145
		15.554	15.9805
		12.4535	17.4255
		25.711	14.5555
		14.1125	17.6865
	Table Analyzed	Fig,1 RV mass (mm3)
	Column B	Ephb4ΔEC
	vs.	vs,
	Column A	Control
	Unpaired t test with Welch's correction
	P value	0.3674
	P value summary	ns
	Significantly different (P < 0.05)?	No
	One- or two-tailed P value?	Two-tailed
	Welch-corrected t, df	t=0,9368, df=11,94
	Mean of column A	18.2
	Mean of column B	16.67
	Difference between means (B - A) ± SEM	-1,534 ± 1,637
	95% confidence interval	-5,103 to 2,035
	R squared (eta squared)	0.06848
