# Supplementary material for: Endothelial EphB4 maintains vascular integrity and transport function in adult heart
Source: eLife. 2019 Nov 29;8:e45863. doi: 10.7554/eLife.45863 (PMC6884395; doi:10.7554/eLife.45863)
Supplement: Figure 2—figure supplement 3—source data 1. [file elife-45863-fig2-figsupp3-data1.xlsx]

## Sheet: Fig.2-figure supplement 3
	Figure 2–figure supplement 3–source data 1
	Source data for Figure 2–figure supplement 3C.
	Quantitation of caveolae in TEM pictures of Ephb4 mutants and control mice.
2/S3C	Total caveolae/ capillary					2/S3C	Basolateral-associated caveolae/ capillary
		Control	Ephb4ΔEC					Control	Ephb4ΔEC
		233.4	189.25					25	51.25
		237.4	252.833					28.8	61.1667
			218.4						51.8
	Table Analyzed	Total caveolae/ capillary					Table Analyzed	Basolateral-associated caveolae/ capillary
	Column B	Ephb4ΔEC					Column B	Ephb4ΔEC
	vs.	vs,					vs.	vs,
	Column A	Control					Column A	Control
	Unpaired t test with Welch's correction						Unpaired t test with Welch's correction
	P value	0.4946					P value	0.0055
	P value summary	ns					P value summary	**
	Significantly different (P < 0.05)?	No					Significantly different (P < 0.05)?	Yes
	One- or two-tailed P value?	Two-tailed					One- or two-tailed P value?	Two-tailed
	Welch-corrected t, df	t=0,8244, df=2,047					Welch-corrected t, df	t=7,450, df=2,926
	Mean of column A	235.4					Mean of column A	26.9
	Mean of column B	220.2					Mean of column B	54.74
	Difference between means (B - A) ± SEM	-15,24 ± 18,48					Difference between means (B - A) ± SEM	27,84 ± 3,737
	95% confidence interval	-93,04 to 62,57					95% confidence interval	15,78 to 39,90
	R squared (eta squared)	0.2493					R squared (eta squared)	0.9499
2/S3C	Basolateral-associated caveolae/ Total caveolae
		Control	Ephb4ΔEC
		0.123478	0.274002
		0.135117	0.238179
			0.254555
	Table Analyzed	Basolateral-associated caveolae/ Total caveolae
	Column B	Ephb4ΔEC
	vs.	vs,
	Column A	Control
	Unpaired t test with Welch's correction
	P value	0.0021
	P value summary	**
	Significantly different (P < 0.05)?	Yes
	One- or two-tailed P value?	Two-tailed
	Welch-corrected t, df	t=10,63, df=2,887
	Mean of column A	0.1293
	Mean of column B	0.2556
	Difference between means (B - A) ± SEM	0,1263 ± 0,01188
	95% confidence interval	0,08763 to 0,1649
	R squared (eta squared)	0.9751
