# Supplementary material for: Endothelial EphB4 maintains vascular integrity and transport function in adult heart
Source: eLife. 2019 Nov 29;8:e45863. doi: 10.7554/eLife.45863 (PMC6884395; doi:10.7554/eLife.45863)
Supplement: Figure 2—source data 1. [file elife-45863-fig2-data1.xlsx]

## Sheet: Fig.2
	Figure 2–source data 1.
	Source data for Figure 2A, B.
	Quantitation of branching points and pericyte coverage in 12 week-old Ephb4 mutants and control mice.
2A	Branching points/190 µm2			2B	Pericyte Coverage (%)
		Control	Ephb4ΔEC			Control	Ephb4ΔEC
			67.6667			48.0556	22.1629
			75.6667			48.2928	28.1533
			88			34.6274	28.805
		94.3333	65
		91.75	58
		92.75	70.25
	Table Analyzed	Fig,2 Branching points/190 µm2			Table Analyzed	Fig,2 Pericyte coverage (%)
	Column B	Ephb4ΔEC			Column B	Ephb4ΔEC
	vs.	vs,			vs.	vs,
	Column A	Control			Column A	Control
	Unpaired t test with Welch's correction				Unpaired t test with Welch's correction
	P value	0.0029			P value	0.0441
	P value summary	**			P value summary	*
	Significantly different (P < 0.05)?	Yes			Significantly different (P < 0.05)?	Yes
	One- or two-tailed P value?	Two-tailed			One- or two-tailed P value?	Two-tailed
	Welch-corrected t, df	t=5,208, df=5,313			Welch-corrected t, df	t=3,466, df=2,836
	Mean of column A	92.94			Mean of column A	43.66
	Mean of column B	70.76			Mean of column B	26.37
	Difference between means (B - A) ± SEM	-22,18 ± 4,259			Difference between means (B - A) ± SEM	-17,28 ± 4,986
	95% confidence interval	-32,94 to -11,42			95% confidence interval	-33,68 to -0,8849
	R squared (eta squared)	0.8362			R squared (eta squared)	0.809
