# Supplementary material for: Endothelial EphB4 maintains vascular integrity and transport function in adult heart
Source: eLife. 2019 Nov 29;8:e45863. doi: 10.7554/eLife.45863 (PMC6884395; doi:10.7554/eLife.45863)
Supplement: Figure 3—figure supplement 1—source data 1. [file elife-45863-fig3-figsupp1-data1.xlsx]

## Sheet: Fig.3-figure supplement 1
	Figure 3–figure supplement 1–source data 1
	Source data for Figure 3-figure supplement 1A, B, C, D.
	Quantitation of heart weight, heart weight / tibia length index (HW/TL), body weight, cardiomyocyte relative area, branching points and pericyte coverage in 10 week-old Ephb4 mutants and control mice.
3/S1A	Heart weight (g)					3/S1A	Heart weight (g)/ tibia length (mm)
		Control	Ephb4ΔEC					Control	Ephb4ΔEC
			0.172						0.00905263
		0.163	0.164					0.00905556	0.00911111
		0.181	0.172					0.00952632	0.0092973
		0.145	0.213					0.00725	0.0115135
		0.149	0.179					0.00784211	0.00895
	Table Analyzed	Heart weight (g)					Table Analyzed	HW (g) / TL (mm)
	Column B	Ephb4ΔEC					Column B	Ephb4ΔEC
	vs.	vs,					vs.	vs,
	Column A	Control					Column A	Control
	Unpaired t test with Welch's correction						Unpaired t test with Welch's correction
	P value	0.1271					P value	0.1497
	P value summary	ns					P value summary	ns
	Significantly different (P < 0.05)?	No					Significantly different (P < 0.05)?	No
	One- or two-tailed P value?	Two-tailed					One- or two-tailed P value?	Two-tailed
	Welch-corrected t, df	t=1,733, df=6,943					Welch-corrected t, df	t=1,628, df=6,657
	Mean of column A	0.1595					Mean of column A	0.008418
	Mean of column B	0.18					Mean of column B	0.009585
	Difference between means (B - A) ± SEM	0,02050 ± 0,01183					Difference between means (B - A) ± SEM	0,001166 ± 0,0007164
	95% confidence interval	-0,007520 to 0,04852					95% confidence interval	-0,0005454 to 0,002878
	R squared (eta squared)	0.3019					R squared (eta squared)	0.2848
3/S1B	Cardiomyocyte relative area (µm2)					3/S1C	Branching points/190 µm2
		Control	Ephb4ΔEC					Control	Ephb4ΔEC
			285.183						100.667
		220.134	263.962					115	100
		218.785	249.024					117.5	105
		224.559	261.429					113.75	99.75
		233.976	336.017
	Table Analyzed	CM relative area (µm2)					Table Analyzed	Branching points/190 µm2
	Column B	Ephb4ΔEC					Column B	Ephb4ΔEC
	vs.	vs,					vs.	vs,
	Column A	Control					Column A	Control
	Unpaired t test with Welch's correction						Unpaired t test with Welch's correction
	P value	0.0218					P value	0.0004
	P value summary	*					P value summary	***
	Significantly different (P < 0.05)?	Yes					Significantly different (P < 0.05)?	Yes
	One- or two-tailed P value?	Two-tailed					One- or two-tailed P value?	Two-tailed
	Welch-corrected t, df	t=3,478, df=4,395					Welch-corrected t, df	t=8,512, df=4,958
	Mean of column A	224.4					Mean of column A	115.4
	Mean of column B	279.1					Mean of column B	101.4
	Difference between means (B - A) ± SEM	54,76 ± 15,75					Difference between means (B - A) ± SEM	-14,06 ± 1,652
	95% confidence interval	12,55 to 96,97					95% confidence interval	-18,32 to -9,805
	R squared (eta squared)	0.7335					R squared (eta squared)	0.936
3/S1D	Pericyte Coverage (%)
		Control	Ephb4ΔEC
			63.6848
		48.0807	69.0644
		58.222	57.795
		63.0447	58.0712
	Table Analyzed	Pericyte coverage (%)
	Column B	Ephb4ΔEC
	vs.	vs,
	Column A	Control
	Unpaired t test with Welch's correction
	P value	0.3401
	P value summary	ns
	Significantly different (P < 0.05)?	No
	One- or two-tailed P value?	Two-tailed
	Welch-corrected t, df	t=1,106, df=3,431
	Mean of column A	56.45
	Mean of column B	62.15
	Difference between means (B - A) ± SEM	5,705 ± 5,157
	95% confidence interval	-9,599 to 21,01
	R squared (eta squared)	0.2629
