# Supplementary material for: Endothelial EphB4 maintains vascular integrity and transport function in adult heart
Source: eLife. 2019 Nov 29;8:e45863. doi: 10.7554/eLife.45863 (PMC6884395; doi:10.7554/eLife.45863)
Supplement: Figure 3—source data 1. [file elife-45863-fig3-data1.xlsx]

## Sheet: Fig.3
	Figure 3–source data 1
	Source data for Figure 3A, B, C, D.
	Quantitation of heart weight, heart weight / tibia length index (HW/TL), body weight, cardiomyocyte relative area, branching points and pericyte coverage in 12 week-old Efnb2 mutants and control mice.
3A	Heart weight (g)			3A	Heart weight (g)/ tibia length (mm)			3B	Cardiomyocyte relative area (µm2)
		Control	Efnb2ΔEC			Control	Efnb2ΔEC			Control	Efnb2ΔEC
		0.166				0.0083				186.368
		0.15	0.137			0.00789474	0.00721053			189.717	244.065
		0.141	0.14			0.00671429	0.007			205.199	270.692
		0.159	0.173			0.00836842	0.00865			189.092	252.831
		0.149	0.193			0.00784211	0.0101579
		0.145	0.165			0.00725	0.00868421
	Table Analyzed	Fig,3 Heart weight(g)			Table Analyzed	Fig,3 HW(g)/TL(mm)			Table Analyzed	Fig,3 CM relative area (µm2)
	Column B	Efnb2ΔEC			Column B	Efnb2ΔEC			Column B	Efnb2ΔEC
	vs.	vs,			vs.	vs,			vs.	vs,
	Column A	Control			Column A	Control			Column A	Control
	Unpaired t test with Welch's correction				Unpaired t test with Welch's correction				Unpaired t test with Welch's correction
	P value	0.4133			P value	0.3713			P value	0.0048
	P value summary	ns			P value summary	ns			P value summary	**
	Significantly different (P < 0.05)?	No			Significantly different (P < 0.05)?	No			Significantly different (P < 0.05)?	Yes
	One- or two-tailed P value?	Two-tailed			One- or two-tailed P value?	Two-tailed			One- or two-tailed P value?	Two-tailed
	Welch-corrected t, df	t=0,8913, df=5,036			Welch-corrected t, df	t=0,9713, df=5,625			Welch-corrected t, df	t=7,093, df=3,175
	Mean of column A	0.1517			Mean of column A	0.007728			Mean of column A	192.6
	Mean of column B	0.1616			Mean of column B	0.008341			Mean of column B	255.9
	Difference between means (B - A) ± SEM	0,009933 ± 0,01114			Difference between means (B - A) ± SEM	0,0006123 ± 0,0006303			Difference between means (B - A) ± SEM	63,27 ± 8,920
	95% confidence interval	-0,01865 to 0,03852			95% confidence interval	-0,0009554 to 0,002180			95% confidence interval	35,74 to 90,79
	R squared (eta squared)	0.1363			R squared (eta squared)	0.1436			R squared (eta squared)	0.9406
3C	Branching points/190 µm			3D	Pericyte Coverage (%)
		Control	Efnb2ΔEC			Control	Efnb2ΔEC
		79.75				31.3068
		93	89			37.4465	41.5847
		90	84.25			29.8649	34.1632
		88.75	80.25			35.2939	33.5335
	Table Analyzed	Fig,3 Branching points/190 µm			Table Analyzed	Fig,3 Pericyte coverage (%)
	Column B	Efnb2ΔEC			Column B	Efnb2ΔEC
	vs.	vs,			vs.	vs,
	Column A	Control			Column A	Control
	Unpaired t test with Welch's correction				Unpaired t test with Welch's correction
	P value	0.4167			P value	0.402
	P value summary	ns			P value summary	ns
	Significantly different (P < 0.05)?	No			Significantly different (P < 0.05)?	No
	One- or two-tailed P value?	Two-tailed			One- or two-tailed P value?	Two-tailed
	Welch-corrected t, df	t=0,8855, df=4,966			Welch-corrected t, df	t=0,9444, df=3,733
	Mean of column A	87.88			Mean of column A	33.48
	Mean of column B	84.5			Mean of column B	36.43
	Difference between means (B - A) ± SEM	-3,375 ± 3,811			Difference between means (B - A) ± SEM	2,949 ± 3,123
	95% confidence interval	-13,19 to 6,442			95% confidence interval	-5,971 to 11,87
	R squared (eta squared)	0.1364			R squared (eta squared)	0.1928
