# Supplementary material for: Endothelial EphB4 maintains vascular integrity and transport function in adult heart
Source: eLife. 2019 Nov 29;8:e45863. doi: 10.7554/eLife.45863 (PMC6884395; doi:10.7554/eLife.45863)
Supplement: Figure 4—source data 1. [file elife-45863-fig4-data1.xlsx]

## Sheet: Fig.4
	Figure 4–source data 1
	Source data for Figure 4B, C, D.
	Quantitation of branching points, pericyte coverage and myocyte relative area in muscle of 12 week-old Ephb4 mutants and control mice.
4B	Branching points/190 µm			4C	Pericyte Coverage (%)			4D	Myocyte relative area (µm2)
	muscle	Control	Ephb4ΔEC		muscle	Control	Ephb4ΔEC		muscle	Control	Ephb4ΔEC
		185	187.25			58.1675	53.7393			1724.93	2678.57
		181.75	183.25			55.1833	60.4372			2222.36	2066.54
		182	185			57.5462	56.308			2298.16	2147.88
	Table Analyzed	Fig,4 Branching points/190 µm2 (muscle)			Table Analyzed	Fig,4 Pericyte coverage(%) (muscle)			Table Analyzed	Fig,4 M relative area (µm2)
	Column B	Ephb4ΔEC			Column B	Ephb4ΔEC			Column B	Ephb4ΔEC
	vs.	vs,			vs.	vs,			vs.	vs,
	Column A	Control			Column A	Control			Column A	Control
	Unpaired t test with Welch's correction				Unpaired t test with Welch's correction				Unpaired t test with Welch's correction
	P value	0.2232			P value	0.9533			P value	0.458
	P value summary	ns			P value summary	ns			P value summary	ns
	Significantly different (P < 0.05)?	No			Significantly different (P < 0.05)?	No			Significantly different (P < 0.05)?	No
	One- or two-tailed P value?	Two-tailed			One- or two-tailed P value?	Two-tailed			One- or two-tailed P value?	Two-tailed
	Welch-corrected t, df	t=1,443, df=3,958			Welch-corrected t, df	t=0,06387, df=2,829			Welch-corrected t, df	t=0,8209, df=3,983
	Mean of column A	182.9			Mean of column A	56.97			Mean of column A	2082
	Mean of column B	185.2			Mean of column B	56.83			Mean of column B	2298
	Difference between means (B - A) ± SEM	2,250 ± 1,559			Difference between means (B - A) ± SEM	-0,1375 ± 2,152			Difference between means (B - A) ± SEM	215,8 ± 263,0
	95% confidence interval	-2,097 to 6,597			95% confidence interval	-7,227 to 6,952			95% confidence interval	-515,5 to 947,2
	R squared (eta squared)	0.3448			R squared (eta squared)	0.00144			R squared (eta squared)	0.1447
