# Supplementary material for: Endothelial EphB4 maintains vascular integrity and transport function in adult heart
Source: eLife. 2019 Nov 29;8:e45863. doi: 10.7554/eLife.45863 (PMC6884395; doi:10.7554/eLife.45863)
Supplement: Figure 5—figure supplement 1—source data 1. [file elife-45863-fig5-figsupp1-data1.xlsx]

## Sheet: Fig.5-figure supplement 1
	Figure 5–figure supplement 1–source data 1
	Source data for Figure 5–figure supplement 1B, C.
	TPM (Transcripts Per Million) values normalized to control of upregulated genes corresponding to the FoxO and mTOR signaling pathways by gene ontology analysis.
5/S1B	TPMs normalized to control			5/S1B	TPMs normalized to control			5/S1B	TPMs normalized to control			5/S1B	TPMs normalized to control
	Agap2	Control	Ephb4ΔEC		Gadd45a	Control	Ephb4ΔEC		Pten	Control	Ephb4ΔEC		Igf1	Control	Ephb4ΔEC
			3.31769				1.47937				1.20766				1.28982
		0.817875	2.18663			0.762339	1.65839			0.95619	1.25453			1.04551	2.36228
		0.995869	2.25986			0.996305	1.583			0.980279	1.15797			0.743713	2.07126
		1.18626	2.68006			1.24136	2.0437			1.06353	1.43182			1.21078	1.91317
	Table Analyzed	Agap2			Table Analyzed	Gadd45a			Table Analyzed	Pten			Table Analyzed	Igf1
	Column B	Ephb4ΔEC			Column B	Ephb4ΔEC			Column B	Ephb4ΔEC			Column B	Ephb4ΔEC
	vs.	vs,			vs.	vs,			vs.	vs,			vs.	vs,
	Column A	Control			Column A	Control			Column A	Control			Column A	Control
	Unpaired t test with Welch's correction				Unpaired t test with Welch's correction				Unpaired t test with Welch's correction				Unpaired t test with Welch's correction
	P value	0.0048			P value	0.0162			P value	0.0146			P value	0.0207
	P value summary	**			P value summary	*			P value summary	*			P value summary	*
	Significantly different (P < 0.05)?	Yes			Significantly different (P < 0.05)?	Yes			Significantly different (P < 0.05)?	Yes			Significantly different (P < 0.05)?	Yes
	One- or two-tailed P value?	Two-tailed			One- or two-tailed P value?	Two-tailed			One- or two-tailed P value?	Two-tailed			One- or two-tailed P value?	Two-tailed
	Welch-corrected t, df	t=5,746, df=3,927			Welch-corrected t, df	t=3,733, df=4,530			Welch-corrected t, df	t=3,872, df=4,458			Welch-corrected t, df	t=3,437, df=4,658
	Mean of column A	1			Mean of column A	1			Mean of column A	1			Mean of column A	1
	Mean of column B	2.611			Mean of column B	1.691			Mean of column B	1.263			Mean of column B	1.909
	Difference between means (B - A) ± SEM	1,611 ± 0,2804			Difference between means (B - A) ± SEM	0,6911 ± 0,1852			Difference between means (B - A) ± SEM	0,2630 ± 0,06792			Difference between means (B - A) ± SEM	0,9091 ± 0,2645
	95% confidence interval	0,8269 to 2,395			95% confidence interval	0,1999 to 1,182			95% confidence interval	0,08183 to 0,4442			95% confidence interval	0,2139 to 1,604
	R squared (eta squared)	0.8937			R squared (eta squared)	0.7546			R squared (eta squared)	0.7708			R squared (eta squared)	0.7172
5/S1B	TPMs normalized to control			5/S1B	TPMs normalized to control			5/S1B	TPMs normalized to control			5/S1C	TPMs normalized to control
	Pi3kr1	Control	Ephb4ΔEC		Foxo3	Control	Ephb4ΔEC		Pck2	Control	Ephb4ΔEC		Irs1	Control	Ephb4ΔEC
			1.98975				1.68541				1.40766				0.81153
		0.896797	1.78407			0.878926	1.58359			0.755639	1.66318			1.20609	0.542304
		1.15414	1.51889			1.0034	1.38495			0.993186	1.65367			0.644708	0.536702
		0.94906	1.7336			1.11767	1.66761			1.25117	1.88557			1.1492	0.619851
	Table Analyzed	Pi3kr1			Table Analyzed	Foxo3			Table Analyzed	Pck2			Table Analyzed	Irs1
	Column B	Ephb4ΔEC			Column B	Ephb4ΔEC			Column B	Ephb4ΔEC			Column B	Ephb4ΔEC
	vs.	vs,			vs.	vs,			vs.	vs,			vs.	vs,
	Column A	Control			Column A	Control			Column A	Control			Column A	Control
	Unpaired t test with Welch's correction				Unpaired t test with Welch's correction				Unpaired t test with Welch's correction				Unpaired t test with Welch's correction
	P value	0.0017			P value	0.0022			P value	0.022			P value	0.1614
	P value summary	**			P value summary	**			P value summary	*			P value summary	ns
	Significantly different (P < 0.05)?	Yes			Significantly different (P < 0.05)?	Yes			Significantly different (P < 0.05)?	Yes			Significantly different (P < 0.05)?	No
	One- or two-tailed P value?	Two-tailed			One- or two-tailed P value?	Two-tailed			One- or two-tailed P value?	Two-tailed			One- or two-tailed P value?	Two-tailed
	Welch-corrected t, df	t=6,074, df=5,000			Welch-corrected t, df	t=5,958, df=4,797			Welch-corrected t, df	t=3,767, df=3,753			Welch-corrected t, df	t=1,964, df=2,523
	Mean of column A	1			Mean of column A	1			Mean of column A	1			Mean of column A	1
	Mean of column B	1.757			Mean of column B	1.58			Mean of column B	1.653			Mean of column B	0.6276
	Difference between means (B - A) ± SEM	0,7566 ± 0,1246			Difference between means (B - A) ± SEM	0,5804 ± 0,09742			Difference between means (B - A) ± SEM	0,6525 ± 0,1732			Difference between means (B - A) ± SEM	-0,3724 ± 0,1896
	95% confidence interval	0,4364 to 1,077			95% confidence interval	0,3267 to 0,8340			95% confidence interval	0,1588 to 1,146			95% confidence interval	-1,046 to 0,3009
	R squared (eta squared)	0.8807			R squared (eta squared)	0.8809			R squared (eta squared)	0.7908			R squared (eta squared)	0.6046
5/S1C	TPMs normalized to control			5/S1C	TPMs normalized to control			5/S1C	TPMs normalized to control
	Rragd	Control	Ephb4ΔEC		Hif1a	Control	Ephb4ΔEC		Vegfa	Control	Ephb4ΔEC
			0.763069				0.701666				0.730446
		0.946353	0.872486			0.836453	0.664578			1.03398	0.664691
		1.03548	0.80998			1.08104	0.70819			0.938711	0.70935
		1.01817	0.938346			1.0825	0.911916			1.0273	0.784019
	Table Analyzed	Rragd			Table Analyzed	Hif1a			Table Analyzed	Vegfa
	Column B	Ephb4ΔEC			Column B	Ephb4ΔEC			Column B	Ephb4ΔEC
	vs.	vs,			vs.	vs,			vs.	vs,
	Column A	Control			Column A	Control			Column A	Control
	Unpaired t test with Welch's correction				Unpaired t test with Welch's correction				Unpaired t test with Welch's correction
	P value	0.0223			P value	0.0667			P value	0.0017
	P value summary	*			P value summary	ns			P value summary	**
	Significantly different (P < 0.05)?	Yes			Significantly different (P < 0.05)?	No			Significantly different (P < 0.05)?	Yes
	One- or two-tailed P value?	Two-tailed			One- or two-tailed P value?	Two-tailed			One- or two-tailed P value?	Two-tailed
	Welch-corrected t, df	t=3,288, df=4,924			Welch-corrected t, df	t=2,558, df=3,761			Welch-corrected t, df	t=7,044, df=4,250
	Mean of column A	1			Mean of column A	1			Mean of column A	1
	Mean of column B	0.846			Mean of column B	0.7466			Mean of column B	0.7221
	Difference between means (B - A) ± SEM	-0,1540 ± 0,04685			Difference between means (B - A) ± SEM	-0,2534 ± 0,09908			Difference between means (B - A) ± SEM	-0,2779 ± 0,03945
	95% confidence interval	-0,2750 to -0,03304			95% confidence interval	-0,5355 to 0,02871			95% confidence interval	-0,3849 to -0,1708
	R squared (eta squared)	0.687			R squared (eta squared)	0.635			R squared (eta squared)	0.9211
