# Supplementary material for: Endothelial EphB4 maintains vascular integrity and transport function in adult heart
Source: eLife. 2019 Nov 29;8:e45863. doi: 10.7554/eLife.45863 (PMC6884395; doi:10.7554/eLife.45863)
Supplement: Figure 5—source data 1. — The table indicates all the transcripts significantly upregulated and downregulated in Ephb4 mutant hearts. [file elife-45863-fig5-data1.xlsx]

## Sheet: Sheet1
Figure 5–source data 1
RNA-seq analysis of Ephb4∆EC and control mouse heart ventricles.
	baseMean	log2FoldChange	lfcSE	stat	pvalue	padj	gene_name
ENSMUSG00000059824	539.402	3.05687	0.14432	21.1812	1.42441e-99	1.89959e-95	Dbp
ENSMUSG00000038550	163.67	2.6688	0.174575	15.2874	9.28058e-53	2.06276e-49	Ciart
ENSMUSG00000055866	247.168	2.49969	0.166094	15.0499	3.45728e-51	6.58662e-48	Per2
ENSMUSG00000028957	285.464	2.35896	0.154287	15.2894	8.9927e-53	2.06276e-49	Per3
ENSMUSG00000020893	273.939	1.95056	0.161015	12.1141	8.89432e-34	1.07832e-30	Per1
ENSMUSG00000020017	71.7512	1.72307	0.194092	8.87757	6.83344e-19	4.55654e-16	Hal
ENSMUSG00000007877	12590.9	1.7194	0.0899901	19.1066	2.22713e-81	1.48505e-77	Tcap
ENSMUSG00000022389	1961.49	1.56574	0.0899803	17.4009	8.12563e-68	2.70908e-64	Tef
ENSMUSG00000021775	1549.05	1.51046	0.0852011	17.7282	2.53946e-70	1.12888e-66	Nr1d2
ENSMUSG00000025271	95.5649	1.50443	0.165943	9.06592	1.23556e-19	8.67232e-17	Pfkfb1
ENSMUSG00000030256	169.837	1.37432	0.149213	9.21051	3.24567e-20	2.54613e-17	Bhlhe41
ENSMUSG00000001918	191.932	1.36714	0.165475	8.26191	1.43362e-16	8.31251e-14	Slc1a5
ENSMUSG00000027313	41.6875	1.34422	0.196258	6.84925	7.42377e-12	2.82867e-09	Chac1
ENSMUSG00000003949	202.516	1.32949	0.157289	8.45251	2.85108e-17	1.72827e-14	Hlf
ENSMUSG00000019944	2028.5	1.29291	0.115324	11.2111	3.59526e-29	3.68819e-26	Rhobtb1
ENSMUSG00000008035	890.382	1.28578	0.0959299	13.4034	5.77725e-41	7.70454e-38	Mid1ip1
ENSMUSG00000003477	127.7	1.20415	0.17766	6.77784	1.21984e-11	4.28098e-09	Inmt
ENSMUSG00000045875	254.147	1.16458	0.15975	7.28997	3.10018e-13	1.33368e-10	Adra1a
ENSMUSG00000031016	140.701	1.12291	0.176057	6.37809	1.79306e-10	4.68868e-08	Wee1
ENSMUSG00000034614	392.654	1.09661	0.139299	7.87232	3.48112e-15	1.85697e-12	Pik3ip1
ENSMUSG00000044951	332.401	1.07132	0.157214	6.81443	9.46366e-12	3.41101e-09	Mylk4
ENSMUSG00000028036	84.501	1.06078	0.179336	5.91502	3.3183e-09	6.79549e-07	Ptgfr
ENSMUSG00000068742	345.445	1.05262	0.145454	7.23676	4.59518e-13	1.91504e-10	Cry2
ENSMUSG00000037885	250.668	1.04124	0.157379	6.61617	3.68624e-11	1.11727e-08	Stk35
ENSMUSG00000024646	709.546	1.04077	0.114006	9.12908	6.90819e-20	5.1182e-17	Cyb5a
ENSMUSG00000037016	211.989	1.0189	0.167243	6.09237	1.1125e-09	2.43217e-07	Frem2
ENSMUSG00000097879	170.06	1.0133	0.143028	7.08463	1.39419e-12	5.4685e-10	Gm26869
ENSMUSG00000049090	453.088	0.966763	0.131714	7.33984	2.13843e-13	9.50601e-11	Zadh2
ENSMUSG00000025422	71.1447	0.946962	0.179858	5.26506	1.4014e-07	1.94678e-05	Agap2
ENSMUSG00000025511	260.978	0.93306	0.14526	6.42338	1.33282e-10	3.55489e-08	Tspan4
ENSMUSG00000047414	112.488	0.929257	0.176171	5.27475	1.32936e-07	1.86614e-05	Flrt2
ENSMUSG00000009585	42.6331	0.914023	0.195364	4.67857	2.88879e-06	0.000275178	Apobec3
ENSMUSG00000026773	74.0015	0.904041	0.172934	5.22768	1.71651e-07	2.26647e-05	Pfkfb3
ENSMUSG00000041040	349.601	0.903618	0.139947	6.45684	1.06909e-10	2.90968e-08	Fam117b
ENSMUSG00000071984	142.922	0.895262	0.188154	4.75813	1.95392e-06	0.000198912	Fndc1
ENSMUSG00000091971	64.3383	0.880445	0.195599	4.50128	6.75468e-06	0.000556052	Hspa1a
ENSMUSG00000020044	1922.19	0.880223	0.075007	11.7352	8.4112e-32	9.34765e-29	Timp3
ENSMUSG00000048489	485.409	0.870624	0.11779	7.39131	1.4539e-13	6.68595e-11	8430408G22Rik
ENSMUSG00000057719	382.754	0.869472	0.161311	5.39005	7.04385e-08	1.04855e-05	Sh3rf2
ENSMUSG00000024561	401.988	0.86392	0.10927	7.9063	2.65148e-15	1.47334e-12	Mbd1
ENSMUSG00000039457	172.975	0.856952	0.152513	5.61888	1.92205e-08	3.28621e-06	Ppl
ENSMUSG00000040170	614.419	0.856431	0.138471	6.18493	6.21312e-10	1.40438e-07	Fmo2
ENSMUSG00000034235	214.816	0.853724	0.138371	6.16981	6.83704e-10	1.51965e-07	Usp54
ENSMUSG00000038068	297.113	0.841201	0.143096	5.87857	4.1382e-09	8.11574e-07	Rnf144b
ENSMUSG00000024222	338.657	0.825211	0.167203	4.93537	7.99997e-07	8.67379e-05	Fkbp5
ENSMUSG00000053411	182.968	0.815289	0.159136	5.12324	3.00334e-07	3.60833e-05	Cbx7
ENSMUSG00000039633	56.3644	0.814929	0.190444	4.27909	1.87656e-05	0.00127683	Lonrf1
ENSMUSG00000100444	13.1113	0.80778	0.177247	4.55737	5.17977e-06	0.000445661	C530043A13Rik
ENSMUSG00000073490	77.1692	0.805985	0.184852	4.36017	1.29961e-05	0.000973689	Ifi207
ENSMUSG00000032010	981.404	0.803988	0.120754	6.65805	2.77483e-11	8.81076e-09	Usp2
ENSMUSG00000020303	137.104	0.797057	0.145472	5.4791	4.27494e-08	6.95251e-06	Stc2
ENSMUSG00000021750	124.871	0.795737	0.180871	4.39949	1.08508e-05	0.000836453	Fam107a
ENSMUSG00000031770	2585.74	0.794715	0.101024	7.86658	3.64481e-15	1.8695e-12	Herpud1
ENSMUSG00000042129	88.7173	0.791532	0.168142	4.70753	2.50737e-06	0.000247691	Rassf4
ENSMUSG00000015243	680.159	0.787807	0.115191	6.83911	7.96873e-12	2.95197e-09	Abca1
ENSMUSG00000038776	370.234	0.786369	0.121356	6.47983	9.18236e-11	2.55116e-08	Ephx1
ENSMUSG00000066113	26.7616	0.778876	0.195966	3.97455	7.05127e-05	0.00395444	Adamtsl1
ENSMUSG00000002346	228.928	0.778592	0.148296	5.25026	1.51883e-07	2.06685e-05	Slc25a42
ENSMUSG00000015340	139.465	0.77704	0.175714	4.42218	9.77121e-06	0.000771058	Cybb
ENSMUSG00000056032	13.5225	0.768474	0.176663	4.34995	1.36167e-05	0.00100327	BC018473
ENSMUSG00000032501	171.503	0.768065	0.172871	4.443	8.87142e-06	0.000704222	Trib1
ENSMUSG00000038725	278.404	0.766139	0.156379	4.89924	9.62088e-07	0.000103471	Pkhd1l1
ENSMUSG00000061100	51.1624	0.763867	0.189241	4.03648	5.42596e-05	0.00317371	Retnla
ENSMUSG00000031838	93.4556	0.754225	0.182817	4.12558	3.69807e-05	0.00226227	Ifi30
ENSMUSG00000020676	54.8554	0.752115	0.193885	3.87918	0.000104809	0.00552462	Ccl11
ENSMUSG00000008845	270.215	0.749206	0.120136	6.23629	4.48057e-10	1.08642e-07	Cd163
ENSMUSG00000040350	263.836	0.748729	0.137811	5.433	5.5413e-08	8.49412e-06	Trim7
ENSMUSG00000003541	344.469	0.747052	0.117594	6.35283	2.11383e-10	5.31887e-08	Ier3
ENSMUSG00000058297	136.794	0.743322	0.163342	4.5507	5.34684e-06	0.000457087	Spock2
ENSMUSG00000028128	198.204	0.741533	0.145399	5.09997	3.39704e-07	4.04491e-05	F3
ENSMUSG00000034647	296.72	0.739976	0.124996	5.92	3.21936e-09	6.70834e-07	Ankrd12
ENSMUSG00000040675	22.584	0.734343	0.193678	3.79157	0.000149701	0.00720725	Mthfd1l
ENSMUSG00000020387	213.078	0.729443	0.140929	5.17598	2.26724e-07	2.87961e-05	Jade2
ENSMUSG00000090799	56.3858	0.729357	0.194097	3.7577	0.000171484	0.00810962	Klhl33
ENSMUSG00000028862	166.292	0.726258	0.15419	4.71015	2.47541e-06	0.000246358	Map3k6
ENSMUSG00000031431	1918.61	0.715208	0.12799	5.58801	2.29688e-08	3.87736e-06	Tsc22d3
ENSMUSG00000041417	2964.9	0.713543	0.107504	6.63733	3.19411e-11	9.90621e-09	Pik3r1
ENSMUSG00000080888	219.202	0.712244	0.138491	5.1429	2.70528e-07	3.34053e-05	Gm14387
ENSMUSG00000015950	62.4724	0.708915	0.195557	3.6251	0.000288846	0.0122287	Ncf1
ENSMUSG00000031762	82.1991	0.703835	0.165759	4.24613	2.17497e-05	0.00145027	Mt2
ENSMUSG00000101941	33.1833	0.702829	0.195422	3.59646	0.000322575	0.0131959	Gm28979
ENSMUSG00000048546	795.782	0.702324	0.11878	5.91282	3.36309e-09	6.79549e-07	Tob2
ENSMUSG00000005268	48.701	0.6997	0.191474	3.65429	0.000257899	0.0111667	Prlr
ENSMUSG00000006906	41.6771	0.698296	0.195944	3.56375	0.000365596	0.0144676	Stambp
ENSMUSG00000027322	61.9609	0.689389	0.181189	3.80482	0.00014191	0.00698343	Siglec1
ENSMUSG00000042985	234.857	0.68913	0.170266	4.04738	5.1795e-05	0.00304332	Upk3b
ENSMUSG00000025981	674.072	0.685666	0.130348	5.26026	1.43853e-07	1.97776e-05	Coq10b
ENSMUSG00000020101	459.269	0.68292	0.118645	5.75602	8.61206e-09	1.59515e-06	Vsir
ENSMUSG00000015850	420.041	0.678324	0.153474	4.41979	9.87965e-06	0.00077503	Adamtsl4
ENSMUSG00000096954	66.6	0.676666	0.193276	3.50103	0.000463469	0.0174553	Gdap10
ENSMUSG00000074529	8.89927	0.675342	0.164525	4.1048	4.04671e-05	0.00243094	Zfp972
ENSMUSG00000079355	46.9405	0.675044	0.185786	3.63345	0.000279656	0.0119535	Ackr4
ENSMUSG00000030103	687.891	0.674107	0.125084	5.38922	7.07628e-08	1.04855e-05	Bhlhe40
ENSMUSG00000024810	90.2924	0.669941	0.179651	3.72913	0.000192145	0.00871578	Il33
ENSMUSG00000021215	147.598	0.665809	0.148527	4.48274	7.36921e-06	0.000599243	Net1
ENSMUSG00000020053	156.04	0.664898	0.171028	3.88766	0.000101215	0.00538956	Igf1
ENSMUSG00000040703	25.1559	0.664333	0.19451	3.41542	0.000636834	0.0219453	Cyp2s1
ENSMUSG00000030087	702.726	0.658229	0.115371	5.70533	1.16116e-08	2.09261e-06	Klf15
ENSMUSG00000070424	179.718	0.65771	0.158713	4.14401	3.41278e-05	0.00214683	Art5
ENSMUSG00000024413	667.014	0.656554	0.119077	5.51369	3.51396e-08	5.78545e-06	Npc1
ENSMUSG00000028211	299.18	0.656502	0.150101	4.37373	1.22142e-05	0.000925501	Trp53inp1
ENSMUSG00000024975	145.123	0.65499	0.171008	3.83016	0.00012806	0.00645438	Pdcd4
ENSMUSG00000022372	31.0591	0.65381	0.190037	3.44043	0.000580788	0.0207074	Sla
ENSMUSG00000090877	73.6175	0.65263	0.195839	3.33249	0.000860727	0.0275268	Hspa1b
ENSMUSG00000020473	258.639	0.648005	0.161749	4.00624	6.1693e-05	0.00354152	Aebp1
ENSMUSG00000042429	126.483	0.645312	0.172798	3.73449	0.000188095	0.00861822	Adora1
ENSMUSG00000052160	82.346	0.644805	0.192012	3.35814	0.000784675	0.025523	Pld4
ENSMUSG00000049690	61.0152	0.642744	0.180345	3.56396	0.000365303	0.0144676	Nckap5
ENSMUSG00000022018	216.62	0.635138	0.148211	4.28537	1.82439e-05	0.0012477	Rgcc
ENSMUSG00000039621	87.0107	0.634992	0.188842	3.36256	0.00077222	0.025241	Prex1
ENSMUSG00000028982	203.416	0.632562	0.151354	4.17934	2.92352e-05	0.00188348	Slc25a33
ENSMUSG00000049103	32.5084	0.630906	0.19623	3.21514	0.0013038	0.0369947	Ccr2
ENSMUSG00000029287	804.449	0.630577	0.0936277	6.73494	1.63996e-11	5.60781e-09	Tgfbr3
ENSMUSG00000021423	19.0643	0.628792	0.186687	3.36815	0.000756736	0.0247956	Ly86
ENSMUSG00000007080	31.877	0.628557	0.196156	3.20438	0.00135353	0.0378399	Pole
ENSMUSG00000030729	103.072	0.62768	0.182279	3.44351	0.000574212	0.0206407	Pgm2l1
ENSMUSG00000024548	51.934	0.62686	0.189743	3.30374	0.000954045	0.0295887	Setbp1
ENSMUSG00000058099	30.8061	0.626419	0.196255	3.19186	0.00141362	0.0391322	Nfam1
ENSMUSG00000020143	80.0085	0.626378	0.196201	3.19253	0.0014103	0.0391322	Dock2
ENSMUSG00000066687	1058.65	0.626062	0.13112	4.77471	1.79969e-06	0.000187505	Zbtb16
ENSMUSG00000011306	174.714	0.623824	0.173034	3.60521	0.000311897	0.0129176	Sugp1
ENSMUSG00000038007	324.633	0.6236	0.139938	4.45625	8.34069e-06	0.000670069	Acer2
ENSMUSG00000051506	68.3153	0.623582	0.195376	3.19171	0.00141435	0.0391322	Wdfy4
ENSMUSG00000002396	177.071	0.623297	0.146039	4.26801	1.97221e-05	0.00132835	Ocel1
ENSMUSG00000032679	392.07	0.621717	0.195609	3.17836	0.00148112	0.0403106	Cd59a
ENSMUSG00000029321	46.0986	0.616511	0.187601	3.28629	0.00101515	0.0309064	Slc10a6
ENSMUSG00000022357	92.3847	0.616095	0.195709	3.14802	0.00164381	0.0437562	Klhl38
ENSMUSG00000043415	316.787	0.613712	0.120531	5.09172	3.54827e-07	4.18759e-05	Otud1
ENSMUSG00000038425	19.0909	0.61305	0.193283	3.17177	0.00151514	0.0409857	Poli
ENSMUSG00000057133	1322.7	0.612251	0.112293	5.45226	4.97336e-08	7.8958e-06	Chd6
ENSMUSG00000060586	451.401	0.611684	0.166182	3.68082	0.000232489	0.0102326	H2-Eb1
ENSMUSG00000054203	169.455	0.609329	0.15398	3.9572	7.5832e-05	0.00419625	Ifi205
ENSMUSG00000095512	21.2982	0.60931	0.194583	3.13136	0.00173999	0.0456781	Gm17222
ENSMUSG00000004360	10.6505	0.605654	0.171564	3.53019	0.000415256	0.0160984	9330159F19Rik
ENSMUSG00000045193	320.998	0.601927	0.115575	5.20813	1.90756e-07	2.46589e-05	Cirbp
ENSMUSG00000022894	356.541	0.600935	0.150026	4.00554	6.18756e-05	0.00354152	Adamts5
ENSMUSG00000050064	71.2938	0.599284	0.175426	3.41615	0.000635125	0.0219431	Zfp697
ENSMUSG00000037922	26.2606	0.598698	0.177225	3.37818	0.000729677	0.0240866	Bank1
ENSMUSG00000055026	15.9129	0.598271	0.190194	3.14559	0.00165751	0.0439455	Gabrg3
ENSMUSG00000021846	115.379	0.597307	0.155309	3.84591	0.000120104	0.00612237	Peli2
ENSMUSG00000029570	102.849	0.596239	0.157253	3.79158	0.000149691	0.00720725	Lfng
ENSMUSG00000043243	10.8917	0.595745	0.1775	3.3563	0.000789934	0.0256315	Fam129c
ENSMUSG00000042644	137.311	0.594953	0.157189	3.78495	0.000153739	0.00737504	Itpr3
ENSMUSG00000048756	1709.92	0.593087	0.090361	6.56352	5.25508e-11	1.4911e-08	Foxo3
ENSMUSG00000079465	58.1637	0.586768	0.184027	3.18849	0.0014302	0.039489	Col4a3
ENSMUSG00000062585	10.9407	0.585581	0.178893	3.27336	0.00106275	0.0319929	Cnr2
ENSMUSG00000038175	183.582	0.582826	0.152272	3.82753	0.000129433	0.00648918	Mylip
ENSMUSG00000066043	116.237	0.582459	0.171917	3.38802	0.000703994	0.0234712	Phactr4
ENSMUSG00000010080	163.935	0.581558	0.180627	3.21967	0.0012834	0.0366178	Epn3
ENSMUSG00000032688	97.0953	0.581102	0.179544	3.23654	0.0012099	0.0347741	Malt1
ENSMUSG00000029650	105.338	0.580478	0.181185	3.20379	0.00135629	0.0378399	Slc46a3
ENSMUSG00000001802	153.809	0.580304	0.159867	3.62992	0.000283504	0.0120691	Lrp3
ENSMUSG00000063663	66.1114	0.577139	0.181103	3.1868	0.00143854	0.0395555	Brwd3
ENSMUSG00000053716	592.55	0.573008	0.111569	5.13592	2.80768e-07	3.43516e-05	Dusp7
ENSMUSG00000032265	414.898	0.56957	0.106987	5.32373	1.0166e-07	1.45779e-05	Fam46a
ENSMUSG00000022206	326.266	0.568132	0.122734	4.62899	3.6746e-06	0.000337962	Npr3
ENSMUSG00000037907	63.8329	0.564183	0.177179	3.18426	0.00145125	0.0398228	Ankrd13b
ENSMUSG00000030711	338.284	0.561618	0.157216	3.57226	0.00035391	0.0141734	Sult1a1
ENSMUSG00000075232	1257.89	0.55887	0.110462	5.05938	4.20631e-07	4.79448e-05	Amd1
ENSMUSG00000025150	166.967	0.558834	0.149674	3.73368	0.000188701	0.00861822	Cbr2
ENSMUSG00000038670	294.849	0.555855	0.160648	3.46009	0.000539996	0.0196205	Mybpc2
ENSMUSG00000030126	479.48	0.554448	0.1177	4.71071	2.46856e-06	0.000246358	Tmcc1
ENSMUSG00000020889	393.419	0.548318	0.12443	4.40663	1.0499e-05	0.000814037	Nr1d1
ENSMUSG00000034858	290.167	0.546825	0.137542	3.97571	7.01706e-05	0.00395444	Fam214a
ENSMUSG00000029228	147.714	0.546586	0.157871	3.46223	0.000535729	0.0195204	Lnx1
ENSMUSG00000035828	795.693	0.546185	0.120869	4.51882	6.2185e-06	0.000524873	Pim3
ENSMUSG00000057880	156.833	0.54488	0.17545	3.10562	0.00189881	0.0481418	Abat
ENSMUSG00000032625	146.178	0.543561	0.168844	3.2193	0.00128503	0.0366178	Thsd7a
ENSMUSG00000028410	794.794	0.54188	0.117748	4.60202	4.18418e-06	0.000372001	Dnaja1
ENSMUSG00000029683	4606.08	0.538156	0.0920976	5.84332	5.11702e-09	9.74866e-07	Lmod2
ENSMUSG00000025938	270.162	0.53691	0.149236	3.59771	0.000321028	0.013173	Slco5a1
ENSMUSG00000006307	154.117	0.534873	0.164021	3.261	0.0011102	0.0331222	Kmt2b
ENSMUSG00000036390	79.646	0.534856	0.172047	3.10877	0.00187866	0.047904	Gadd45a
ENSMUSG00000044393	684.377	0.531187	0.138821	3.82643	0.000130016	0.00649398	Dsg2
ENSMUSG00000023885	572.961	0.530589	0.115936	4.57655	4.72697e-06	0.00041473	Thbs2
ENSMUSG00000040618	99.7946	0.530275	0.164996	3.21387	0.00130959	0.0370799	Pck2
ENSMUSG00000024164	3131.31	0.529435	0.13943	3.79714	0.000146373	0.00712419	C3
ENSMUSG00000059013	177.06	0.529319	0.159548	3.31762	0.000907887	0.0285556	Sh2d3c
ENSMUSG00000079017	191.453	0.528417	0.150192	3.51829	0.000434344	0.0166928	Ifi27l2a
ENSMUSG00000039835	135.189	0.522861	0.152641	3.42543	0.000613823	0.021542	Nhsl1
ENSMUSG00000047996	170.705	0.521825	0.151972	3.43368	0.000595442	0.0210632	Prrg1
ENSMUSG00000031808	1387.33	0.518317	0.101961	5.08346	3.70615e-07	4.2608e-05	Slc27a1
ENSMUSG00000054072	663.849	0.517797	0.152611	3.39293	0.000691495	0.0232286	Iigp1
ENSMUSG00000047793	96.7585	0.515866	0.163905	3.14735	0.00164757	0.043769	Sned1
ENSMUSG00000061119	167.197	0.515483	0.156275	3.29856	0.000971815	0.029862	Prcp
ENSMUSG00000026425	214.83	0.515253	0.143874	3.58127	0.000341926	0.0138599	Srgap2
ENSMUSG00000041598	218.718	0.512622	0.134218	3.81934	0.00013381	0.00663379	Cdc42ep4
ENSMUSG00000032712	800.619	0.512041	0.110939	4.61553	3.92085e-06	0.000355703	2810474O19Rik
ENSMUSG00000060798	433.985	0.511337	0.136435	3.74784	0.000178361	0.00828787	Intu
ENSMUSG00000054619	348.543	0.4998	0.115744	4.31815	1.57343e-05	0.00111613	Mettl7a1
ENSMUSG00000070565	485.412	0.499731	0.127934	3.90615	9.37768e-05	0.00508377	Rasal2
ENSMUSG00000056493	156.149	0.499705	0.153565	3.25403	0.0011378	0.0334222	Foxk1
ENSMUSG00000022377	193.71	0.497324	0.13703	3.62932	0.000284171	0.0120691	Asap1
ENSMUSG00000014329	294.245	0.489041	0.124065	3.94183	8.08637e-05	0.00445619	Bicc1
ENSMUSG00000037235	846.234	0.482995	0.0920737	5.24575	1.55651e-07	2.07576e-05	Mxd4
ENSMUSG00000020866	174.178	0.482649	0.15372	3.13979	0.00169071	0.044648	Cacna1g
ENSMUSG00000037434	305.073	0.482342	0.141686	3.4043	0.00066334	0.0226828	Slc30a1
ENSMUSG00000002980	1887.23	0.48067	0.0892639	5.38482	7.25167e-08	1.06273e-05	Bcam
ENSMUSG00000022507	739.839	0.479472	0.103089	4.65107	3.30214e-06	0.000307953	1810013L24Rik
ENSMUSG00000030737	262.381	0.469344	0.142199	3.30062	0.000964701	0.0297807	Slco2b1
ENSMUSG00000005611	132.518	0.468995	0.148033	3.16818	0.00153394	0.0414102	Mrvi1
ENSMUSG00000031490	582.256	0.463513	0.118869	3.89935	9.64508e-05	0.00518656	Eif4ebp1
ENSMUSG00000030306	2666.35	0.463429	0.0792942	5.84443	5.08298e-09	9.74866e-07	Tmtc1
ENSMUSG00000024978	2720.46	0.460044	0.13822	3.32834	0.000873637	0.0278063	Gpam
ENSMUSG00000028980	546.847	0.459156	0.111244	4.12746	3.66794e-05	0.00225418	H6pd
ENSMUSG00000024066	1551.45	0.458386	0.113628	4.03409	5.48143e-05	0.00319215	Xdh
ENSMUSG00000040181	431.754	0.458055	0.118956	3.85064	0.000117811	0.00605569	Fmo1
ENSMUSG00000021025	372.741	0.452274	0.123826	3.65249	0.000259713	0.0112088	Nfkbia
ENSMUSG00000003526	222.221	0.450029	0.14167	3.1766	0.00149013	0.0404732	Prodh
ENSMUSG00000023088	513.134	0.448028	0.103236	4.33986	1.4257e-05	0.00102774	Abcc1
ENSMUSG00000030630	191.764	0.447272	0.14249	3.13898	0.00169535	0.0446822	Fah
ENSMUSG00000022197	794.161	0.447106	0.128401	3.48211	0.000497472	0.0183775	Pdzd2
ENSMUSG00000033863	1663.36	0.446671	0.0975807	4.57745	4.70671e-06	0.00041473	Klf9
ENSMUSG00000078866	442.021	0.445434	0.120443	3.69831	0.000217043	0.00964829	Zfp970
ENSMUSG00000017765	640.055	0.442712	0.0987342	4.48388	7.32977e-06	0.000599243	Slc12a4
ENSMUSG00000037003	989.314	0.438587	0.132645	3.30647	0.000944811	0.0294392	Tns2
ENSMUSG00000053199	425.165	0.437386	0.117701	3.71608	0.000202335	0.00909349	Arhgap20
ENSMUSG00000005483	254.289	0.436426	0.135951	3.21017	0.00132657	0.037323	Dnajb1
ENSMUSG00000020422	311.478	0.434055	0.117499	3.69411	0.00022066	0.00977649	Tns3
ENSMUSG00000071540	1500.87	0.430097	0.13272	3.24065	0.00119258	0.0345797	3425401B19Rik
ENSMUSG00000042717	3663.67	0.42792	0.10438	4.09964	4.13792e-05	0.00247459	Ppp1r3a
ENSMUSG00000038145	1786.46	0.422448	0.0987617	4.27744	1.89053e-05	0.0012798	Snrk
ENSMUSG00000032735	467.479	0.422204	0.111848	3.77481	0.000160129	0.00759956	Ablim3
ENSMUSG00000021236	2050.59	0.420763	0.0841575	4.99971	5.74171e-07	6.38546e-05	Entpd5
ENSMUSG00000040648	2128.65	0.419759	0.0877321	4.78456	1.71363e-06	0.000179944	Ppip5k2
ENSMUSG00000060187	1408.99	0.417608	0.128274	3.2556	0.00113154	0.0334222	Lrrc10
ENSMUSG00000036478	281.303	0.417118	0.133956	3.11386	0.0018466	0.04724	Btg1
ENSMUSG00000021903	431.821	0.41311	0.12962	3.18708	0.00143716	0.0395555	Galnt15
ENSMUSG00000031442	1116.2	0.409155	0.106397	3.84555	0.00012028	0.00612237	Mcf2l
ENSMUSG00000056492	2293.57	0.408215	0.0792343	5.152	2.57722e-07	3.21213e-05	Adgrf5
ENSMUSG00000017466	848.492	0.407174	0.111397	3.65516	0.000257018	0.0111648	Timp2
ENSMUSG00000027782	919.003	0.406614	0.109463	3.71462	0.000203512	0.00910751	Kpna4
ENSMUSG00000045838	523.905	0.406375	0.116617	3.4847	0.000492697	0.0183025	A430105I19Rik
ENSMUSG00000071659	470.203	0.405211	0.129434	3.13063	0.00174432	0.0457019	Hnrnpul2
ENSMUSG00000026107	973.167	0.403903	0.0894715	4.51432	6.35198e-06	0.000532767	Nabp1
ENSMUSG00000090946	269.269	0.403484	0.124546	3.23964	0.00119681	0.0345797	Ccdc71l
ENSMUSG00000073535	1044.29	0.403457	0.101288	3.98325	6.79785e-05	0.00385771	Gm5532
ENSMUSG00000056708	426.859	0.399264	0.124064	3.21821	0.00128991	0.0366786	Ier5
ENSMUSG00000049791	399.174	0.395744	0.123336	3.20867	0.00133348	0.0374386	Fzd4
ENSMUSG00000041935	285.506	0.394709	0.121852	3.23926	0.00119841	0.0345797	AW549877
ENSMUSG00000033159	261.225	0.393938	0.125583	3.13687	0.00170759	0.044916	Cnppd1
ENSMUSG00000004207	17663	0.392271	0.0903606	4.34117	1.41723e-05	0.00102718	Psap
ENSMUSG00000031840	387.935	0.38966	0.114442	3.40487	0.000661945	0.0226828	Rab3a
ENSMUSG00000038332	1898.39	0.386001	0.114257	3.37837	0.00072917	0.0240866	Sesn1
ENSMUSG00000030747	3963.28	0.383103	0.118268	3.23928	0.00119833	0.0345797	Dgat2
ENSMUSG00000048416	1507.27	0.381823	0.113185	3.37344	0.000742342	0.0244212	Mlf1
ENSMUSG00000013275	850.688	0.378755	0.104987	3.60763	0.000309008	0.0128378	Slc41a1
ENSMUSG00000047036	503.878	0.372253	0.111496	3.33872	0.000841653	0.0271774	Zfp445
ENSMUSG00000023805	709.679	0.36425	0.110426	3.29857	0.000971771	0.029862	Synj2
ENSMUSG00000021072	960.942	0.363661	0.112283	3.23879	0.00120039	0.0345797	Tmx1
ENSMUSG00000046798	352.828	0.358817	0.108645	3.30266	0.000957735	0.0296342	Cldn12
ENSMUSG00000000078	803.106	0.358712	0.0866083	4.14177	3.44629e-05	0.00215773	Klf6
ENSMUSG00000004105	1151.75	0.358527	0.0968279	3.70272	0.000213301	0.00951365	Angptl2
ENSMUSG00000041797	473.971	0.357511	0.115091	3.10634	0.0018942	0.0481162	Abca9
ENSMUSG00000036452	698.113	0.355714	0.111804	3.18158	0.00146476	0.0400288	Arhgap26
ENSMUSG00000032097	1037.02	0.351647	0.105478	3.33384	0.000856567	0.0275257	Ddx6
ENSMUSG00000024410	353.718	0.349562	0.112274	3.11346	0.00184908	0.04724	3110002H16Rik
ENSMUSG00000043154	4053.6	0.348175	0.0804715	4.32669	1.51364e-05	0.00107946	Ppp2r3a
ENSMUSG00000032875	1062.93	0.346355	0.088018	3.93505	8.31785e-05	0.00456489	Arhgef17
ENSMUSG00000031765	1223.67	0.339224	0.107752	3.1482	0.00164279	0.0437562	Mt1
ENSMUSG00000033327	2368.55	0.324423	0.0873077	3.71586	0.000202517	0.00909349	Tnxb
ENSMUSG00000020190	3084.59	0.303716	0.0863235	3.51835	0.00043424	0.0166928	Mknk2
ENSMUSG00000032060	8250.45	0.302416	0.0703826	4.29673	1.73332e-05	0.00120394	Cryab
ENSMUSG00000013663	1843.09	0.298767	0.0753241	3.96642	7.29608e-05	0.00405419	Pten
ENSMUSG00000004655	5301.15	0.291075	0.0857219	3.39558	0.000684845	0.0232041	Aqp1
ENSMUSG00000044086	1025.11	0.288737	0.0891508	3.23875	0.00120054	0.0345797	Lmod3
ENSMUSG00000033960	1171.75	0.262214	0.0795816	3.29491	0.000984537	0.0301142	Jcad
ENSMUSG00000043639	3339.83	0.242856	0.0777726	3.12264	0.00179234	0.0466849	Rbm20
ENSMUSG00000013936	94870.2	-0.212502	0.0639834	-3.3212	0.000896323	0.0284604	Myl2
ENSMUSG00000068614	123006	-0.235335	0.0623297	-3.77565	0.000159592	0.00759956	Actc1
ENSMUSG00000016319	2853.51	-0.244651	0.0711379	-3.43911	0.000583637	0.0207074	Slc25a5
ENSMUSG00000041731	2071.22	-0.252805	0.078694	-3.21251	0.00131582	0.0371317	Pgm5
ENSMUSG00000003731	1166.36	-0.257091	0.0780732	-3.29294	0.000991446	0.0302561	Kpna6
ENSMUSG00000038582	2027.85	-0.261881	0.0766568	-3.41628	0.00063484	0.0219431	Pptc7
ENSMUSG00000028278	1999.99	-0.267244	0.0813361	-3.28567	0.00101739	0.0309064	Rragd
ENSMUSG00000024163	1254.07	-0.280857	0.0901725	-3.11466	0.00184156	0.04724	Mapk8ip3
ENSMUSG00000016664	2565.38	-0.281119	0.073602	-3.81945	0.000133752	0.00663379	Pacsin2
ENSMUSG00000060675	1698.76	-0.28562	0.0733543	-3.89371	9.87226e-05	0.00528741	Pla2g16
ENSMUSG00000024871	935.572	-0.286812	0.0917603	-3.12567	0.00177402	0.0462981	Doc2g
ENSMUSG00000059263	2598.24	-0.287796	0.0850424	-3.38415	0.000713992	0.0236861	Usp47
ENSMUSG00000078486	5365.07	-0.288087	0.076172	-3.78205	0.000155542	0.00743478	Perm1
ENSMUSG00000018428	2209.57	-0.289234	0.090953	-3.18004	0.00147254	0.0401591	Akap1
ENSMUSG00000022013	841.826	-0.289887	0.0846845	-3.42314	0.000619013	0.0216104	Dnajc15
ENSMUSG00000022752	1432.37	-0.290734	0.0845397	-3.43902	0.000583832	0.0207074	Tomm70a
ENSMUSG00000049680	1224.8	-0.291017	0.0905958	-3.21225	0.00131698	0.0371317	Urgcp
ENSMUSG00000031485	889.002	-0.296145	0.0843395	-3.51134	0.000445849	0.0170368	Prosc
ENSMUSG00000009090	954.408	-0.296662	0.0897842	-3.30417	0.000952577	0.0295887	Ap1b1
ENSMUSG00000028063	1623.28	-0.301332	0.0925674	-3.25527	0.00113286	0.0334222	Lmna
ENSMUSG00000016921	957.218	-0.303892	0.0929309	-3.27009	0.00107514	0.0322929	Srsf6
ENSMUSG00000037805	1473.49	-0.306551	0.0796212	-3.85011	0.000118062	0.00605569	Rpl10a
ENSMUSG00000034525	781.537	-0.309847	0.0866725	-3.57492	0.000350336	0.0141151	Ice1
ENSMUSG00000015932	1616.6	-0.312781	0.0759032	-4.12079	3.77581e-05	0.00229928	Dstn
ENSMUSG00000003923	474.42	-0.313427	0.100474	-3.11948	0.0018117	0.0470054	Tfam
ENSMUSG00000054752	1242.45	-0.313874	0.0879047	-3.57061	0.000356151	0.0142136	Fsd1l
ENSMUSG00000039768	819.966	-0.314596	0.0972495	-3.23494	0.00121668	0.0348938	Dnajc11
ENSMUSG00000019810	2564.51	-0.314681	0.0859192	-3.66252	0.000249746	0.0108844	Fuca2
ENSMUSG00000028527	641.326	-0.318486	0.100803	-3.15948	0.00158051	0.0423247	Ak4
ENSMUSG00000038936	807.493	-0.320984	0.0933049	-3.44016	0.000581363	0.0207074	Sccpdh
ENSMUSG00000002395	769.104	-0.321099	0.0915404	-3.50773	0.000451943	0.0172084	Use1
ENSMUSG00000028339	1059.99	-0.322347	0.0942084	-3.42164	0.000622452	0.0216737	Col15a1
ENSMUSG00000019907	779.443	-0.323722	0.102431	-3.1604	0.00157553	0.0422762	Ppp1r12a
ENSMUSG00000054428	844.339	-0.327539	0.0974723	-3.36033	0.000778501	0.0253841	Atpif1
ENSMUSG00000044864	720.044	-0.327603	0.10514	-3.11586	0.00183408	0.0472186	Ankrd50
ENSMUSG00000007411	664.572	-0.328424	0.100857	-3.25633	0.00112862	0.0334222	Mark3
ENSMUSG00000022865	1206.62	-0.328915	0.0908093	-3.62204	0.00029229	0.0122578	Cxadr
ENSMUSG00000034343	400.859	-0.330702	0.103123	-3.20687	0.00134189	0.0375955	Ube2f
ENSMUSG00000004383	1046.47	-0.332552	0.0994641	-3.34344	0.000827476	0.0267845	Large1
ENSMUSG00000033161	13542.8	-0.334384	0.0944012	-3.54216	0.000396869	0.0154304	Atp1a1
ENSMUSG00000019558	2164.23	-0.334983	0.0835702	-4.0084	6.1131e-05	0.00352919	Slc6a8
ENSMUSG00000053617	904.85	-0.335525	0.098424	-3.40897	0.000652081	0.0224128	Sh3pxd2a
ENSMUSG00000035891	689.905	-0.335783	0.0884634	-3.79572	0.000147213	0.00713902	Cerk
ENSMUSG00000021650	631.087	-0.339402	0.0973963	-3.48475	0.000492589	0.0183025	Ptcd2
ENSMUSG00000037075	764.085	-0.340061	0.102598	-3.31451	0.000918052	0.0288074	Rnf139
ENSMUSG00000074909	487.898	-0.344573	0.101512	-3.3944	0.000687802	0.0232045	Ranbp6
ENSMUSG00000024158	487.805	-0.345184	0.101707	-3.3939	0.000689036	0.0232045	Hagh
ENSMUSG00000040990	1173.24	-0.345288	0.10035	-3.44084	0.000579908	0.0207074	Sh3kbp1
ENSMUSG00000021706	389.044	-0.347899	0.112347	-3.09666	0.00195713	0.0494325	Zfyve16
ENSMUSG00000072235	636.222	-0.348457	0.110093	-3.16512	0.00155019	0.0416802	Tuba1a
ENSMUSG00000038587	732.397	-0.348597	0.0910227	-3.82979	0.000128255	0.00645438	Akap12
ENSMUSG00000020246	347.638	-0.3487	0.1091	-3.19615	0.00139276	0.0387763	Hcfc2
ENSMUSG00000008435	577.063	-0.352737	0.0987363	-3.57251	0.000353571	0.0141734	Rdh13
ENSMUSG00000036372	485.241	-0.356606	0.100589	-3.54516	0.000392376	0.0153004	Tmem258
ENSMUSG00000026603	639.606	-0.357159	0.0992312	-3.59926	0.000319121	0.0131352	Smyd2
ENSMUSG00000032449	712.577	-0.359682	0.100106	-3.593	0.000326895	0.0133142	Slc25a36
ENSMUSG00000079557	1186.13	-0.360056	0.115473	-3.11809	0.00182029	0.047136	_Marc2
ENSMUSG00000011179	838.156	-0.367799	0.117096	-3.14101	0.00168365	0.0445498	Odc1
ENSMUSG00000047746	4406.13	-0.368297	0.0713212	-5.16392	2.41831e-07	3.04251e-05	Fbxo40
ENSMUSG00000017817	5878.08	-0.369098	0.0989613	-3.72972	0.000191691	0.00871578	Jph2
ENSMUSG00000037343	343.576	-0.371561	0.111934	-3.31946	0.000901903	0.0285018	Taf2
ENSMUSG00000040128	978.315	-0.371903	0.0963073	-3.86163	0.000112632	0.00586269	Pnrc1
ENSMUSG00000046768	426.682	-0.372142	0.109799	-3.3893	0.000700706	0.0234712	Rhoj
ENSMUSG00000024867	342.994	-0.375234	0.110738	-3.38848	0.000702803	0.0234712	Pip5k1b
ENSMUSG00000063275	482.746	-0.377198	0.103333	-3.6503	0.000261936	0.0112683	Hacd1
ENSMUSG00000020593	3665.12	-0.378014	0.0900937	-4.19578	2.7193e-05	0.00178643	Lpin1
ENSMUSG00000021188	1172.89	-0.378926	0.114134	-3.32002	0.000900107	0.0285018	Trip11
ENSMUSG00000020283	422.48	-0.379323	0.122366	-3.09992	0.00193574	0.0489848	Pex13
ENSMUSG00000027305	499.984	-0.381181	0.12243	-3.11347	0.00184904	0.04724	Ndufaf1
ENSMUSG00000066842	666.957	-0.381384	0.103951	-3.66888	0.000243613	0.0106869	Hmcn1
ENSMUSG00000058756	809.958	-0.381813	0.0923288	-4.13536	3.54391e-05	0.00218804	Thra
ENSMUSG00000051346	317.203	-0.382184	0.111615	-3.42411	0.000616812	0.02159	Spryd4
ENSMUSG00000031965	1993.7	-0.383584	0.102271	-3.75065	0.000176376	0.0082243	Tbx20
ENSMUSG00000039242	405.278	-0.385749	0.110203	-3.50035	0.000464655	0.0174553	B3galnt2
ENSMUSG00000021200	7405.2	-0.385842	0.0905862	-4.25939	2.04985e-05	0.00137371	Asb2
ENSMUSG00000027712	1112.85	-0.386109	0.106924	-3.61108	0.000304927	0.0127078	Anxa5
ENSMUSG00000024501	582.292	-0.387298	0.0996361	-3.88713	0.000101438	0.00538956	Dpysl3
ENSMUSG00000024571	440.881	-0.389861	0.109206	-3.56995	0.000357044	0.0142136	Gm16286
ENSMUSG00000027204	1929.22	-0.390681	0.109275	-3.57522	0.000349931	0.0141151	Fbn1
ENSMUSG00000020542	933.185	-0.392244	0.120486	-3.25551	0.00113189	0.0334222	Myocd
ENSMUSG00000026672	1176.29	-0.39397	0.0991283	-3.97435	7.05726e-05	0.00395444	Optn
ENSMUSG00000010064	940.571	-0.394969	0.114039	-3.46345	0.000533288	0.0194847	Slc38a3
ENSMUSG00000008398	326.235	-0.399913	0.121771	-3.28415	0.00102292	0.0310038	Elk3
ENSMUSG00000027983	350.415	-0.400608	0.115935	-3.45545	0.000549376	0.019855	Cyp2u1
ENSMUSG00000040321	302.076	-0.402975	0.116284	-3.46543	0.000529379	0.0194485	Zfp770
ENSMUSG00000005103	2198.22	-0.403285	0.0742258	-5.43321	5.53484e-08	8.49412e-06	Wdr1
ENSMUSG00000030327	225.055	-0.404416	0.13074	-3.09329	0.0019795	0.0499029	Necap1
ENSMUSG00000015605	1429.16	-0.404809	0.0925941	-4.37186	1.2319e-05	0.000928174	Srf
ENSMUSG00000028086	1006.89	-0.407319	0.0964641	-4.22249	2.4162e-05	0.0016031	Fbxw7
ENSMUSG00000028436	572.158	-0.407338	0.120763	-3.37302	0.000743478	0.0244212	Dcaf12
ENSMUSG00000016528	5440.75	-0.409236	0.0982453	-4.16545	3.10738e-05	0.00196398	Mapkapk2
ENSMUSG00000005609	351.341	-0.410793	0.125372	-3.27659	0.00105068	0.0317012	Ctr9
ENSMUSG00000021944	934.985	-0.414624	0.110408	-3.7554	0.000173066	0.00812944	Gata4
ENSMUSG00000022297	248.249	-0.417341	0.121761	-3.42754	0.000609077	0.0214318	Fzd6
ENSMUSG00000021109	1078.22	-0.421473	0.106199	-3.9687	7.22652e-05	0.00403234	Hif1a
ENSMUSG00000033377	641.195	-0.422256	0.111191	-3.79757	0.000146122	0.00712419	Palmd
ENSMUSG00000027435	1453.64	-0.424535	0.0976555	-4.34727	1.37843e-05	0.00101004	Cd93
ENSMUSG00000020846	573.573	-0.425913	0.134462	-3.16752	0.00153744	0.0414208	Rflnb
ENSMUSG00000051343	1286.39	-0.427855	0.0996726	-4.29261	1.76588e-05	0.0012202	Rab11fip5
ENSMUSG00000042608	649.938	-0.428079	0.111677	-3.83318	0.000126497	0.00641431	Stk40
ENSMUSG00000044066	862.964	-0.429377	0.109482	-3.9219	8.78531e-05	0.00478208	Cep68
ENSMUSG00000004665	532.903	-0.433537	0.123951	-3.49764	0.000469395	0.0175839	Cnn2
ENSMUSG00000044338	531.66	-0.434744	0.128043	-3.3953	0.000685545	0.0232041	Aplnr
ENSMUSG00000015843	780.949	-0.434805	0.0862456	-5.04147	4.61963e-07	5.22096e-05	Rxrg
ENSMUSG00000030022	327.613	-0.437359	0.133825	-3.26815	0.00108253	0.0324419	Adamts9
ENSMUSG00000028986	915.828	-0.437485	0.135017	-3.24023	0.00119433	0.0345797	Klhl7
ENSMUSG00000062960	2120.27	-0.438942	0.100312	-4.37575	1.21013e-05	0.000922191	Kdr
ENSMUSG00000037519	680.674	-0.443451	0.105681	-4.19612	2.71527e-05	0.00178643	Ppfia1
ENSMUSG00000026235	1182.87	-0.443565	0.112892	-3.92913	8.52551e-05	0.00465968	Epha4
ENSMUSG00000038982	191.301	-0.443978	0.140847	-3.1522	0.00162046	0.0433076	Bloc1s5
ENSMUSG00000050503	737.261	-0.447881	0.12433	-3.60235	0.000315349	0.0130201	Fbxl22
ENSMUSG00000027238	2163.53	-0.451849	0.096182	-4.69786	2.62907e-06	0.000255922	Frmd5
ENSMUSG00000037905	429.046	-0.454247	0.116992	-3.88273	0.00010329	0.00546619	Bri3bp
ENSMUSG00000045316	576.688	-0.455184	0.0976666	-4.66059	3.15298e-06	0.00029673	Fahd1
ENSMUSG00000030208	700.49	-0.458585	0.13017	-3.52297	0.000426741	0.0164957	Emp1
ENSMUSG00000043858	284.659	-0.459736	0.142485	-3.22657	0.00125284	0.0358538	NA
ENSMUSG00000025915	179.879	-0.460325	0.132364	-3.47772	0.000505692	0.0186296	Sgk3
ENSMUSG00000037458	1429.67	-0.461162	0.100006	-4.61136	4.00042e-06	0.000360471	Azin1
ENSMUSG00000064302	5444.06	-0.461178	0.0811857	-5.68053	1.34277e-08	2.38762e-06	Clasp1
ENSMUSG00000046562	346.434	-0.461655	0.115298	-4.00403	6.22727e-05	0.00354901	Unc119b
ENSMUSG00000022051	842.763	-0.461664	0.113867	-4.0544	5.02635e-05	0.00299247	Bnip3l
ENSMUSG00000022420	208.449	-0.463117	0.130272	-3.555	0.000377979	0.0148257	Dnal4
ENSMUSG00000055065	1323.7	-0.463902	0.0777988	-5.96284	2.47892e-09	5.24744e-07	Ddx17
ENSMUSG00000030137	2014.22	-0.465771	0.106912	-4.35658	1.32109e-05	0.00098425	Tuba8
ENSMUSG00000028348	1226.73	-0.465872	0.101864	-4.57348	4.79689e-06	0.000418113	Cavin4
ENSMUSG00000035900	489.684	-0.467945	0.104585	-4.4743	7.66617e-06	0.000619613	Gramd4
ENSMUSG00000022526	273.075	-0.469924	0.13584	-3.45938	0.000541417	0.0196205	Zfp251
ENSMUSG00000056234	716.97	-0.471744	0.130197	-3.62331	0.00029086	0.0122363	Ncoa4
ENSMUSG00000041235	307.779	-0.47521	0.124838	-3.80663	0.000140874	0.00695815	Chd7
ENSMUSG00000021759	497.16	-0.47927	0.111372	-4.30333	1.68254e-05	0.00118721	Plpp1
ENSMUSG00000026858	1157.8	-0.48032	0.0971161	-4.94584	7.58173e-07	8.2877e-05	Miga2
ENSMUSG00000023951	2477.87	-0.485208	0.0783426	-6.19341	5.88774e-10	1.36897e-07	Vegfa
ENSMUSG00000040596	288.894	-0.487844	0.11686	-4.1746	2.98506e-05	0.00191239	Pogk
ENSMUSG00000035105	687.91	-0.491238	0.151508	-3.24233	0.00118555	0.0345797	Egln3
ENSMUSG00000027800	631.372	-0.491736	0.100894	-4.8738	1.09473e-06	0.000116794	Tm4sf1
ENSMUSG00000032434	458.292	-0.492242	0.117748	-4.18048	2.90895e-05	0.00188319	Cmtm6
ENSMUSG00000011752	1194.97	-0.494916	0.120432	-4.10952	3.9649e-05	0.00239257	Pgam1
ENSMUSG00000015305	614.062	-0.496231	0.0992548	-4.99957	5.74576e-07	6.38546e-05	Sash1
ENSMUSG00000022255	968.056	-0.497307	0.106714	-4.66017	3.15954e-06	0.00029673	Mtdh
ENSMUSG00000021365	586.008	-0.497776	0.122965	-4.04811	5.1634e-05	0.00304332	Nedd9
ENSMUSG00000022828	131.813	-0.497888	0.153443	-3.24479	0.00117539	0.0344506	Gtf2e1
ENSMUSG00000015745	638.188	-0.500864	0.105759	-4.73589	2.18101e-06	0.000220348	Plekho1
ENSMUSG00000031799	1330.99	-0.501537	0.105369	-4.75984	1.9375e-06	0.000198758	Tpm4
ENSMUSG00000031864	259.536	-0.504374	0.116416	-4.33253	1.47407e-05	0.00105689	Ints10
ENSMUSG00000054079	165.205	-0.507998	0.160159	-3.17184	0.00151478	0.0409857	Utp18
ENSMUSG00000024764	242.954	-0.508927	0.136268	-3.73476	0.000187892	0.00861822	Naa40
ENSMUSG00000035021	152.466	-0.513867	0.148366	-3.46351	0.000533179	0.0194847	Baz1a
ENSMUSG00000008136	21115.9	-0.515282	0.103921	-4.9584	7.10757e-07	7.8336e-05	Fhl2
ENSMUSG00000035357	622.548	-0.517205	0.13396	-3.86088	0.000112981	0.00586269	Pdzrn3
ENSMUSG00000050953	5800.29	-0.522994	0.100448	-5.20663	1.92301e-07	2.46589e-05	Gja1
ENSMUSG00000040624	134.694	-0.523086	0.148813	-3.51506	0.000439652	0.0168483	Plekhg1
ENSMUSG00000029009	179.789	-0.526355	0.134847	-3.90335	9.487e-05	0.00512221	Mthfr
ENSMUSG00000026305	748.145	-0.526668	0.0908118	-5.79956	6.64901e-09	1.24889e-06	Lrrfip1
ENSMUSG00000042249	306.189	-0.529954	0.15906	-3.33178	0.000862926	0.0275311	Grk3
ENSMUSG00000028271	247.775	-0.53326	0.152049	-3.50716	0.00045292	0.0172084	Gtf2b
ENSMUSG00000030862	266.965	-0.535741	0.171848	-3.11752	0.0018238	0.047136	Cpxm2
ENSMUSG00000020802	551.403	-0.53631	0.143546	-3.73617	0.000186846	0.00861822	Ube2o
ENSMUSG00000001467	165.911	-0.536527	0.153096	-3.50451	0.000457453	0.0173312	Cyp51
ENSMUSG00000024440	367.641	-0.539858	0.144549	-3.73477	0.000187883	0.00861822	Pcdh12
ENSMUSG00000061897	17.4312	-0.543369	0.174354	-3.11647	0.00183032	0.0472131	Gm14292
ENSMUSG00000067653	741.29	-0.544281	0.0997961	-5.45393	4.92694e-08	7.8958e-06	Ankrd23
ENSMUSG00000015647	1450.14	-0.544753	0.10383	-5.24657	1.54955e-07	2.07576e-05	Lama5
ENSMUSG00000020612	5661.72	-0.545951	0.0816314	-6.688	2.2624e-11	7.54283e-09	Prkar1a
ENSMUSG00000034028	21.6346	-0.547032	0.171841	-3.18336	0.00145575	0.0398643	Cd226
ENSMUSG00000087579	110.986	-0.548431	0.154102	-3.55888	0.000372433	0.0146946	Hectd2os
ENSMUSG00000003228	167.174	-0.553306	0.136708	-4.04734	5.18022e-05	0.00304332	Grk5
ENSMUSG00000029675	453.654	-0.556948	0.163979	-3.39646	0.000682642	0.0232041	Eln
ENSMUSG00000055980	617.668	-0.560298	0.157988	-3.54645	0.000390454	0.0152701	Irs1
ENSMUSG00000051335	871.445	-0.561351	0.103603	-5.41827	6.01769e-08	9.11953e-06	Gfod1
ENSMUSG00000023791	116.251	-0.567195	0.156522	-3.62374	0.000290377	0.0122363	Pigx
ENSMUSG00000069874	178.308	-0.568793	0.171745	-3.31185	0.000926828	0.0289466	Irgm2
ENSMUSG00000083011	12.1838	-0.573379	0.167791	-3.41722	0.000632636	0.0219431	Gm12816
ENSMUSG00000026558	638.207	-0.574062	0.112876	-5.08576	3.66166e-07	4.24626e-05	Uck2
ENSMUSG00000096010	108.858	-0.577091	0.176056	-3.27788	0.0010459	0.0316283	Hist4h4
ENSMUSG00000028150	579.045	-0.5835	0.103771	-5.62294	1.87736e-08	3.25149e-06	Rorc
ENSMUSG00000039982	117.268	-0.583694	0.179335	-3.25477	0.00113485	0.0334222	Dtx4
ENSMUSG00000076431	101.05	-0.587259	0.176028	-3.33616	0.000849446	0.0273628	Sox4
ENSMUSG00000037145	10.669	-0.588429	0.167986	-3.50284	0.000460326	0.0173907	2210407C18Rik
ENSMUSG00000044813	246.726	-0.589302	0.142398	-4.13841	3.49718e-05	0.00216946	Shb
ENSMUSG00000020521	302.906	-0.598551	0.127324	-4.70102	2.58862e-06	0.000253837	Rnft1
ENSMUSG00000018427	229.115	-0.598854	0.180777	-3.31267	0.000924104	0.0289292	Ypel2
ENSMUSG00000040498	71.215	-0.599122	0.191914	-3.12182	0.00179737	0.0467246	Igsf23
ENSMUSG00000026357	22.5551	-0.60199	0.174611	-3.44761	0.000565573	0.0203851	Rgs18
ENSMUSG00000042962	70.5845	-0.603098	0.194066	-3.1077	0.00188551	0.047987	Gm5436
ENSMUSG00000052981	57.4313	-0.60466	0.193443	-3.12578	0.00177334	0.0462981	Ube2ql1
ENSMUSG00000053093	12999.5	-0.606455	0.105839	-5.72998	1.00442e-08	1.83493e-06	Myh7
ENSMUSG00000021702	58.4096	-0.609555	0.186849	-3.26229	0.00110516	0.0330459	Thbs4
ENSMUSG00000020641	296.546	-0.610881	0.15176	-4.02532	5.68988e-05	0.00329914	Rsad2
ENSMUSG00000053886	151.142	-0.624366	0.161016	-3.87766	0.000105465	0.00553731	Sh2d4a
ENSMUSG00000030994	19.1119	-0.624667	0.189488	-3.2966	0.000978645	0.0300028	D7Ertd443e
ENSMUSG00000001473	346.15	-0.626061	0.117214	-5.34118	9.2346e-08	1.33862e-05	Tubb6
ENSMUSG00000036306	44.4049	-0.631632	0.194101	-3.25414	0.00113736	0.0334222	Lzts1
ENSMUSG00000040711	108.916	-0.632315	0.17257	-3.6641	0.000248208	0.0108528	Sh3pxd2b
ENSMUSG00000042115	263.502	-0.632352	0.139083	-4.54659	5.45222e-06	0.000463126	Klhdc8a
ENSMUSG00000028396	702.939	-0.632374	0.114513	-5.52228	3.34635e-08	5.57837e-06	2310002L09Rik
ENSMUSG00000044847	74.5429	-0.638843	0.17507	-3.64908	0.000263182	0.0112855	Lsm11
ENSMUSG00000047085	530.848	-0.639828	0.145895	-4.38554	1.15696e-05	0.000886737	Lrrc4b
ENSMUSG00000026409	608.36	-0.643295	0.140809	-4.56855	4.91107e-06	0.000425286	Pfkfb2
ENSMUSG00000046229	106.663	-0.644396	0.187765	-3.43192	0.000599321	0.0211443	Scand1
ENSMUSG00000044468	1006.35	-0.648164	0.19531	-3.31865	0.000904547	0.0285178	Fam46c
ENSMUSG00000038871	1045.49	-0.649108	0.194779	-3.33254	0.000860574	0.0275268	Bpgm
ENSMUSG00000041378	159.774	-0.649313	0.147307	-4.40788	1.04386e-05	0.000814037	Cldn5
ENSMUSG00000039236	112.185	-0.651536	0.186548	-3.49258	0.000478372	0.0178699	Isg20
ENSMUSG00000027078	551.433	-0.655735	0.193658	-3.38606	0.000709049	0.0235807	Ube2l6
ENSMUSG00000043456	50.4115	-0.657635	0.188775	-3.48371	0.000494521	0.0183192	Zfp536
ENSMUSG00000017677	171.847	-0.657931	0.138117	-4.76357	1.90197e-06	0.000196625	Wsb1
ENSMUSG00000067279	2098.74	-0.65831	0.0887787	-7.41518	1.21461e-13	5.78499e-11	Ppp1r3c
ENSMUSG00000029822	429.274	-0.663646	0.147318	-4.50485	6.64209e-06	0.000553618	Osbpl3
ENSMUSG00000034161	43.407	-0.666238	0.195773	-3.40312	0.000666213	0.0227228	Scx
ENSMUSG00000044707	14.961	-0.668216	0.179403	-3.72466	0.000195579	0.00884151	Ccnjl
ENSMUSG00000004098	358.46	-0.672106	0.143415	-4.68645	2.77991e-06	0.000266711	Col5a3
ENSMUSG00000029922	683.023	-0.674009	0.157064	-4.29131	1.77626e-05	0.00122104	Mkrn1
ENSMUSG00000032883	63.8307	-0.683153	0.185019	-3.69233	0.00022221	0.00981257	Acsl3
ENSMUSG00000021250	47.5746	-0.686397	0.193019	-3.55612	0.000376377	0.0148064	Fos
ENSMUSG00000038422	47.1707	-0.686888	0.189748	-3.61999	0.000294612	0.0123164	Hdhd3
ENSMUSG00000041258	269.611	-0.689867	0.160381	-4.30143	1.69698e-05	0.0011911	Zfp236
ENSMUSG00000025270	2415.63	-0.700235	0.194913	-3.59255	0.000327464	0.0133142	Alas2
ENSMUSG00000038816	448.764	-0.700496	0.118719	-5.90047	3.62458e-09	7.21454e-07	Ctnnal1
ENSMUSG00000000957	159.081	-0.704497	0.152344	-4.62437	3.75731e-06	0.000343202	Mmp14
ENSMUSG00000051067	169.961	-0.711265	0.154403	-4.60656	4.09379e-06	0.000366408	Lingo3
ENSMUSG00000049001	60.7892	-0.715416	0.185451	-3.85771	0.000114453	0.00591605	Ndnf
ENSMUSG00000057606	40.0883	-0.720218	0.191942	-3.75227	0.000175243	0.00820014	Colq
ENSMUSG00000032024	85.5074	-0.721836	0.172137	-4.19339	2.74821e-05	0.00179657	Clmp
ENSMUSG00000052336	24.4714	-0.734387	0.195559	-3.75532	0.000173123	0.00812944	Cx3cr1
ENSMUSG00000030878	323.186	-0.735895	0.171191	-4.29869	1.71812e-05	0.00119962	Cdr2
ENSMUSG00000107383	93.6085	-0.742276	0.195459	-3.7976	0.000146102	0.00712419	Gm4366
ENSMUSG00000046841	384.862	-0.746486	0.117141	-6.37256	1.85898e-10	4.76757e-08	Ckap4
ENSMUSG00000029238	880.363	-0.748112	0.118913	-6.29128	3.14857e-10	7.77581e-08	Clock
ENSMUSG00000056749	277.215	-0.754259	0.19515	-3.86502	0.00011108	0.00580926	Nfil3
ENSMUSG00000021281	676.254	-0.761246	0.10645	-7.15124	8.60003e-13	3.47546e-10	Tnfaip2
ENSMUSG00000000031	263.492	-0.764763	0.140641	-5.43768	5.39786e-08	8.46892e-06	H19
ENSMUSG00000073400	32.0043	-0.768282	0.184353	-4.16746	3.08013e-05	0.00195603	Trim10
ENSMUSG00000004939	247.707	-0.772574	0.166603	-4.6372	3.53163e-06	0.000327068	Nmrk2
ENSMUSG00000069919	14545.7	-0.78656	0.188457	-4.17369	2.99708e-05	0.00191239	Hba-a1
ENSMUSG00000052305	38940.9	-0.791046	0.192276	-4.11412	3.88658e-05	0.00235597	Hbb-bs
ENSMUSG00000032193	119.426	-0.791553	0.162572	-4.86893	1.12205e-06	0.000118759	Ldlr
ENSMUSG00000097141	74.4622	-0.80001	0.179866	-4.44781	8.67514e-06	0.000692764	Gm10524
ENSMUSG00000020734	18.2188	-0.800524	0.191364	-4.18325	2.87372e-05	0.00186946	Grin2c
ENSMUSG00000035385	31.1772	-0.808255	0.195307	-4.13839	3.49756e-05	0.00216946	Ccl2
ENSMUSG00000069917	10483.5	-0.818526	0.188512	-4.34204	1.41166e-05	0.00102718	Hba-a2
ENSMUSG00000091694	70.6582	-0.852805	0.195858	-4.35421	1.33547e-05	0.000989432	Apol11b
ENSMUSG00000072902	130.836	-0.863647	0.162579	-5.31218	1.08324e-07	1.53682e-05	Gm10435
ENSMUSG00000083012	1007.76	-0.867558	0.112446	-7.71532	1.2068e-14	5.96071e-12	Fam220a
ENSMUSG00000001493	82.4185	-0.874092	0.171767	-5.08881	3.60322e-07	4.21514e-05	Meox1
ENSMUSG00000037035	35.619	-0.883186	0.196112	-4.50348	6.68483e-06	0.00055372	Inhbb
ENSMUSG00000070803	181.853	-0.896069	0.174855	-5.12463	2.98121e-07	3.60833e-05	Cited4
ENSMUSG00000041920	104.781	-0.903051	0.160132	-5.63941	1.70632e-08	2.99414e-06	Slc16a6
ENSMUSG00000074676	35.9063	-0.914305	0.194792	-4.69375	2.68238e-06	0.000259219	Foxs1
ENSMUSG00000025889	326.144	-0.969087	0.156515	-6.19165	5.95383e-10	1.36897e-07	Snca
ENSMUSG00000006403	16.8664	-0.993584	0.190137	-5.22563	1.73559e-07	2.2692e-05	Adamts4
ENSMUSG00000008348	927.063	-1.00654	0.0963445	-10.4473	1.50812e-25	1.34082e-22	Ubc
ENSMUSG00000042487	188.596	-1.04329	0.157834	-6.61004	3.84223e-11	1.13866e-08	Leo1
ENSMUSG00000030089	1089.63	-1.12311	0.185486	-6.05496	1.40448e-09	3.021e-07	Slc41a3
ENSMUSG00000026077	35.0445	-1.21229	0.19552	-6.20034	5.63426e-10	1.34176e-07	Npas2
ENSMUSG00000023067	141.94	-1.22522	0.183882	-6.66308	2.68144e-11	8.72187e-09	Cdkn1a
ENSMUSG00000052485	27.4274	-1.29315	0.196158	-6.59239	4.32791e-11	1.25472e-08	Tmem171
ENSMUSG00000011256	416.435	-1.29686	0.153085	-8.47152	2.42205e-17	1.53812e-14	Adam19
ENSMUSG00000022951	1445.44	-1.33903	0.0915254	-14.6302	1.80307e-48	3.00572e-45	Rcan1
ENSMUSG00000031880	2112.71	-1.56396	0.110504	-14.1529	1.79192e-45	2.65522e-42	Rrad
ENSMUSG00000055116	235.903	-1.96709	0.196116	-10.0302	1.12242e-23	9.35537e-21	Arntl
ENSMUSG00000037379	100.84	-2.00487	0.188909	-10.6128	2.59732e-26	2.47413e-23	Spon2
