# Supplementary material for: Endothelial EphB4 maintains vascular integrity and transport function in adult heart
Source: eLife. 2019 Nov 29;8:e45863. doi: 10.7554/eLife.45863 (PMC6884395; doi:10.7554/eLife.45863)
Supplement: Figure 5—source data 2. — The table indicates all the proteins significantly upregulated and downregulated in Ephb4 mutant hearts. [file elife-45863-fig5-data2.xlsx]

## Sheet: significant hits
Figure 5–source data 2
Global proteome analysis of Ephb4∆EC and control mouse heart ventricles.
Protein IDs	Protein names	Gene names	log2 LFQ intensities						Number of proteins	Peptides	Unique peptides	Sequence coverage [%]	Score	MS/MS count	-Log Student's T-test p-value KO_WT	log2 Difference KO_WT
			KO_4154	KO_4155	KO_4159	WT_4169	WT_4171	WT_4172
Q9CUN6	E3 ubiquitin-protein ligase SMURF1	Smurf1	28.2966	27.884	27.4254	18.3468	25.7645	19.6444	1	4	2	5.1	3.2401	12	1.34475	6.61676
P56382	ATP synthase subunit epsilon, mitochondrial	Atp5e	30.8183	30.4996	30.677	27.029	27.8625	27.4205	1	3	3	34.6	2.1099	125	3.63032	3.22766
O88559	Menin	Men1	23.901	23.331	25.9465	20.0126	21.7987	22.3609	1	3	3	5.9	4.1729	7	1.32124	3.00214
Q3TQI7	Uncharacterized protein C9orf78 homolog		24.3283	22.806	23.945	20.7071	21.2646	20.6875	1	3	3	9.7	9.0562	13	2.32209	2.80674
A2ANY6		Mdn1	25.1285	23.0995	24.9187	22.7478	20.5523	22.1628	1	4	4	0.7	1.8968	12	1.30474	2.56126
P12246	Serum amyloid P-component	Apcs	24.9579	24.7112	24.8784	22.9315	22.6362	21.6665	1	6	6	26.3	148.15	21	2.48068	2.43779
Q8CF66	Ragulator complex protein LAMTOR4;Ragulator complex protein LAMTOR4, N-terminally processed	Lamtor4	22.8378	22.9681	23.1911	21.2695	20.5864	20.0498	1	3	3	29.3	59.951	7	2.52129	2.36374
P97931	Uracil-DNA glycosylase	Ung	20.0481	20.6465	22.4791	19.4359	18.2768	18.6759	1	4	4	18.3	3.954	9	1.31348	2.26173
A0A075B5Q2		Ighv5-9	21.2591	20.8446	22.1343	18.8685	19.2215	19.3969	1	2	2	27.4	1.9278	2	2.26765	2.2504
P70340	Mothers against decapentaplegic homolog 1	Smad1	22.7757	23.9387	24.1683	22.5132	20.8693	20.9524	1	8	1	16.3	5.1398	4	1.47364	2.18256
Q9CQ21	Malignant T-cell-amplified sequence 2	Mcts2	21.2126	21.847	21.5466	19.331	20.5571	18.7075	1	5	2	37	1.7919	3	1.60167	2.00353
Q6VVW5	Atrial natriuretic peptide receptor 2	Npr2	19.553	20.7824	20.5582	17.937	18.7707	18.3592	1	2	2	3.1	3.0459	2	1.90976	1.94224
P51910	Apolipoprotein D	Apod	20.2716	21.3746	19.8317	18.8709	19.3649	18.1302	1	3	3	19.6	5.2701	6	1.36629	1.70399
E9Q2I4		Elmsan1	22.8368	22.4388	23.3762	20.4613	22.0013	21.489	1	9	9	12.4	35.539	14	1.38449	1.56676
Q8BH50	Uncharacterized protein C18orf25 homolog		22.7403	23.3393	23.3431	21.7814	20.8899	22.1293	1	4	4	21.6	7.132	18	1.66933	1.54073
Q8VEH6	COBW domain-containing protein 1	Cbwd1	29.7116	29.6389	29.4241	27.623	28.1763	28.4696	1	9	9	31.3	30.126	31	2.33381	1.50194
O55128	Histone deacetylase complex subunit SAP18	Sap18	25.0513	25.2581	24.7399	23.3907	23.6204	23.6528	1	6	6	46.4	11.4	18	2.9811	1.46175
D3YUE4		Fam151b	24.1302	23.5799	24.4214	23.0704	22.9562	21.8502	1	7	7	35.8	54.408	24	1.43184	1.41823
Q9JJ59	ATP-binding cassette sub-family B member 9	Abcb9	26.2581	26.1891	25.9318	25.2703	24.0799	24.9993	1	3	3	4.6	2.4497	15	1.64077	1.34319
Q61464	Zinc finger protein 638	Znf638	23.9843	24.0962	23.7618	23.1419	22.7784	21.9001	1	9	9	5.4	11.075	25	1.6095	1.34062
Q8BZB2	Phosphopantothenoylcysteine decarboxylase	Ppcdc	28.1982	28.3449	27.9832	27.0765	26.6023	26.9159	1	13	13	82.8	109.55	127	2.77471	1.31049
Q8CAF4	NHS-like protein 1	Nhsl1	24.3769	24.5853	25.1037	23.5587	23.3366	23.4783	1	6	6	6.2	13.089	19	2.26059	1.23077
E9Q9Q2		R3hdm1	22.8822	22.6903	21.9949	20.6869	21.5402	21.6554	1	5	5	6.5	8.5435	11	1.40511	1.22834
D3Z4I3	RNA-binding protein 24	Rbm24	30.5251	30.3915	31.1069	29.2405	29.783	29.4981	1	7	2	35.6	39.142	74	1.90741	1.16731
Q91WZ8	Dysbindin	Dtnbp1	22.9317	23.0147	23.1674	22.3824	22.0089	21.2578	1	5	5	15.6	20.663	24	1.57165	1.15488
Q99PM9	Uridine-cytidine kinase 2	Uck2	20.9666	21.231	21.3958	20.4904	20.004	19.6504	1	5	3	24.1	5.0445	10	1.86333	1.14955
Q925J9	Mediator of RNA polymerase II transcription subunit 1	Med1	23.1936	23.9142	24.0776	22.3324	22.9762	22.51	1	10	10	7.7	2.3059	16	1.55403	1.1223
Q63810	Calcineurin subunit B type 1	Ppp3r1	27.3585	27.5975	27.06	25.9622	26.7676	26.0564	1	9	8	67.1	128.77	70	1.64778	1.0766
Q8K3A0	Iron-sulfur cluster co-chaperone protein HscB, mitochondrial	Hscb	29.4393	29.1844	29.4424	27.8262	28.2175	28.8785	1	11	11	56	323.31	173	1.51875	1.04793
Q8K3W3	Protein CASC3	Casc3	24.7541	24.4804	24.4486	23.0319	23.4178	24.1017	1	7	7	14.6	28.823	27	1.4778	1.04394
Q9JJG9	Nitric oxide-associated protein 1	Noa1	24.9987	24.6872	24.5961	23.8398	23.8269	23.5545	1	13	13	25.4	67.282	57	2.57698	1.02028
O09114	Prostaglandin-H2 D-isomerase	Ptgds	28.4329	28.3741	28.7274	27.3894	27.2262	27.9411	1	8	8	64.6	159.54	67	1.82674	0.99258
Q5NBX1	Protein cordon-bleu	Cobl	24.9665	25.1662	25.0879	24.3403	23.5019	24.4505	1	7	7	7.8	46.784	27	1.48227	0.975954
Q9R059	Four and a half LIM domains protein 3	Fhl3	27.6115	27.286	28.0647	26.359	26.8992	26.8188	1	12	12	54.7	282.83	105	1.57025	0.961738
Q62176	RNA-binding protein 38	Rbm38	29.7816	29.4264	29.7766	28.614	28.7119	28.791	1	8	3	39.7	323.31	146	2.76187	0.955882
Q8VEB4	Group XV phospholipase A2	Pla2g15	23.5963	24.1223	23.817	22.7779	22.7708	23.2152	1	5	5	16.5	14.948	16	1.91942	0.923932
Q9CXX9	CUE domain-containing protein 2	Cuedc2	24.8417	24.0425	24.5582	23.2064	23.9873	23.493	1	7	7	29.2	127.66	55	1.3166	0.918591
P54227	Stathmin	Stmn1	27.0873	26.4687	26.3813	25.5914	25.9193	25.7539	1	9	6	47.7	43.921	68	1.67691	0.890911
P62774	Myotrophin	Mtpn	27.7904	28.1447	27.3713	26.8527	26.9282	26.8532	1	6	6	61	110.17	92	1.77795	0.890752
O08573	Galectin-9	Lgals9	26.8522	26.6103	26.8809	25.6703	25.8405	26.1641	1	8	8	25.2	39.187	55	2.21091	0.88952
Q80UW8	DNA-directed RNA polymerases I, II, and III subunit RPABC1	Polr2e	26.7497	25.9919	26.2029	25.6618	25.4873	25.1502	1	10	10	60	185.71	65	1.50411	0.881725
Q8JZU0	Nucleoside diphosphate-linked moiety X motif 13	Nudt13	27.0552	27.2496	27.9677	26.5226	26.6251	26.4966	1	9	9	37.5	323.31	87	1.45195	0.876075
Q11136	Xaa-Pro dipeptidase	Pepd	29.2188	29.1722	29.2516	28.4272	28.1788	28.4582	1	21	21	46.7	237.86	177	3.14741	0.859467
E9Q5C9		Nolc1	26.8315	27.1046	26.9632	26.3294	25.6553	26.3398	1	14	14	20.8	150.63	69	1.63494	0.858283
Q9CX00	IST1 homolog	Ist1	26.1464	26.1658	26.6306	25.23	25.7739	25.382	1	12	12	30.9	26.282	47	1.70496	0.852286
Q5SFM8	RNA-binding protein 27	Rbm27	23.9457	24.9096	24.4777	23.6	23.4099	23.8091	1	14	13	19.5	28.537	34	1.30166	0.837973
P70671	Interferon regulatory factor 3	Irf3	24.8062	25.0841	25.1339	24.1156	24.259	24.1451	1	6	6	17.9	32.534	29	2.77758	0.834813
Q571G4	Protein lin-54 homolog	Lin54	23.5836	23.1897	23.4573	22.8322	22.1361	22.764	1	5	5	9.3	7.4607	9	1.5357	0.832715
Q8VE70	Programmed cell death protein 10	Pdcd10	29.304	28.941	29.3299	28.4043	28.2302	28.4488	1	9	9	50.5	190.92	86	2.36872	0.830526
Q8BYY4	Tetratricopeptide repeat protein 39B	Ttc39b	24.1218	23.8142	24.1992	23.5731	22.7967	23.2802	1	6	6	11.7	10.094	19	1.50238	0.828381
Q62241	U1 small nuclear ribonucleoprotein C	Snrpc	27.2984	26.8102	27.0072	26.3191	25.8884	26.4553	1	3	3	24.5	106.4	58	1.67462	0.817674
Q9EQJ9	Membrane-associated guanylate kinase, WW and PDZ domain-containing protein 3	Magi3	23.2129	23.0705	23.1539	22.6061	21.9489	22.4344	1	12	11	10.2	5.3491	19	1.81326	0.815969
A0A0A6YY83		Pcdh7	22.8011	21.9017	22.5276	21.3962	21.7033	21.685	1	5	5	5.8	16.17	11	1.3419	0.815308
Q99K28	ADP-ribosylation factor GTPase-activating protein 2	Arfgap2	28.3368	28.1422	28.3049	27.6033	27.2688	27.4809	1	25	24	58.3	323.31	197	2.67291	0.81028
Q9D0M5;Q80ZS7	Dynein light chain 2, cytoplasmic	Dynll2	30.9243	30.651	31.0185	29.7724	30.1712	30.2568	2	5	2	58.4	323.31	202	1.89822	0.797844
Q9CY62	E3 ubiquitin-protein ligase RNF181	Rnf181	25.0046	25.0545	25.4859	24.2503	24.7614	24.1483	1	8	8	53.9	234.93	64	1.50925	0.794964
Q9R0L7	A-kinase anchor protein 8-like	Akap8l	24.9813	24.5337	25.4775	24.099	24.1727	24.3415	1	12	12	20.4	136.29	45	1.31759	0.793111
O35386	Phytanoyl-CoA dioxygenase, peroxisomal	Phyh	28.4174	28.2869	27.934	27.3192	27.7669	27.1817	1	18	18	66.6	268.16	174	1.58934	0.790173
Q9CQ40	39S ribosomal protein L49, mitochondrial	Mrpl49	28.9034	28.718	29.1384	28.2078	28.1404	28.0626	1	9	9	60.2	104.55	111	2.43355	0.782999
P62311	U6 snRNA-associated Sm-like protein LSm3	Lsm3	27.97	27.4768	27.2423	26.4871	26.957	26.9235	1	4	4	41.2	227.67	61	1.37609	0.773789
Q9CQE3	28S ribosomal protein S17, mitochondrial	Mrps17	26.0723	26.3157	25.9323	25.3105	25.0878	25.646	1	7	7	58.3	198.07	60	1.73683	0.758678
Q9CTY5	Calcium uptake protein 3, mitochondrial	Micu3	25.0698	25.4345	24.8174	24.2474	24.3179	24.5083	1	7	7	15.3	4.1645	25	1.73236	0.749386
Q99JH8;Q9CQM2	ER lumen protein-retaining receptor 1;ER lumen protein-retaining receptor 2	Kdelr1;Kdelr2	20.8023	20.5424	21.0695	19.9552	20.0655	20.1583	2	2	2	14.2	2.8269	3	1.98815	0.745037
O70433	Four and a half LIM domains protein 2	Fhl2	33.2555	32.8083	33.2006	32.3018	32.0511	32.6941	1	23	23	82.1	323.31	832	1.46463	0.73916
Q8BGF3	WD repeat-containing protein 92	Wdr92	22.9729	23.2169	23.022	22.7219	22.2564	22.0692	1	6	6	23.2	34.972	20	1.59244	0.721434
G3UYX3;Q9JKN6		Nova2	27.2944	27.7167	27.1307	26.9201	26.7737	26.2903	2	12	12	27.5	84.376	78	1.30485	0.719205
Q8QZZ7	EKC/KEOPS complex subunit Tprkb	Tprkb	25.5965	25.6125	25.5193	24.5361	25.1071	24.9329	1	3	3	25.1	60.998	28	1.85833	0.717405
Q9CQF4	Uncharacterized protein C6orf203 homolog		28.429	28.5745	28.7172	27.8324	27.8439	27.8937	1	7	7	27.9	138.15	87	2.95991	0.716859
Q61189	Methylosome subunit pICln	Clns1a	24.6384	24.7362	24.9703	23.7495	24.2811	24.1649	1	6	6	41.9	105.62	54	1.71531	0.716466
Q9D5V6	Synapse-associated protein 1	Syap1	28.3381	28.0856	28.5477	27.5259	27.8875	27.4273	1	18	18	62.7	323.31	114	1.6705	0.71021
F2Z3U3		Raph1	27.1005	27.1283	27.2708	26.2809	26.3825	26.7083	1	31	29	35.8	175.04	140	2.15359	0.709256
Q6P4S6	Serine/threonine-protein kinase SIK3	Sik3	27.0934	26.8623	27.5511	26.5241	26.2813	26.5739	1	28	28	27.8	222.73	142	1.48246	0.709153
Q08024	Core-binding factor subunit beta	Cbfb	23.6862	24.0878	24.3533	23.0515	23.5538	23.402	1	5	5	27.3	131.77	32	1.35189	0.706666
Q923U0	TOM1-like protein 1	Tom1l1	26.1162	25.9146	26.2358	25.8212	25.1836	25.1597	1	9	9	32.3	61.192	61	1.38524	0.700706
Q80VD1	Protein FAM98B	Fam98b	26.9485	27.3727	27.3712	26.3294	26.734	26.5433	1	13	11	46.2	239.32	77	1.71656	0.695197
Q9D7N6	39S ribosomal protein L30, mitochondrial	Mrpl30	26.475	26.0568	26.6889	25.8291	25.7211	25.5874	1	6	6	40.6	177.71	59	1.60407	0.694312
Q91ZW2	GDP-fucose protein O-fucosyltransferase 1	Pofut1	23.5882	23.4589	24.0309	23.1506	23.2077	22.6691	1	7	7	24.4	51.345	30	1.31583	0.683535
Q9WU00	Nuclear respiratory factor 1	Nrf1	24.7673	25.2872	25.5025	24.3484	24.6468	24.5116	1	5	5	10.9	16.351	30	1.36088	0.683393
P46062	Signal-induced proliferation-associated protein 1	Sipa1	25.9011	25.5505	25.954	25.4834	24.8899	25.0142	1	18	18	21	96.704	63	1.41936	0.672708
B1AR10		Mllt6	23.8226	23.9183	23.9897	23.6411	23.0148	23.0643	1	3	3	2.9	19.422	11	1.4997	0.670142
Q64705	Upstream stimulatory factor 2	Usf2	24.323	24.8048	24.9223	24.0939	23.9562	24.0167	1	5	4	20.2	95.813	22	1.61308	0.661123
Q9CQG1	Putative glutathione-specific gamma-glutamylcyclotransferase 2	Chac2	26.348	26.067	26.3997	25.2444	25.8188	25.7735	1	8	8	46.6	78.431	48	1.44903	0.659323
Q91VZ6	Stromal membrane-associated protein 1	Smap1	24.5641	24.3209	24.4449	23.9725	23.7064	23.6791	1	7	6	18.9	204.82	34	2.30667	0.657323
P55002	Microfibrillar-associated protein 2	Mfap2	24.5825	24.1957	24.5966	23.7372	24.0799	23.5921	1	3	3	20.8	20.165	24	1.54546	0.655185
P06728	Apolipoprotein A-IV	Apoa4	30.9496	31.5917	31.5367	30.6094	30.7376	30.7822	1	28	28	71.4	323.31	614	1.4264	0.649579
Q9WTZ1;D3Z497	RING-box protein 2	Rnf7;Gm7075	25.0466	24.3528	24.6768	23.9494	23.9806	24.1977	2	3	3	38.1	170.4	43	1.40692	0.649478
Q9R111;REV__Q9Z2U0	Guanine deaminase	Gda	28.5613	28.1396	28.657	27.8535	27.99	27.5843	2	24	24	63.9	323.31	160	1.49876	0.643377
O89017	Legumain	Lgmn	26.0299	26.4782	26.5086	25.4373	25.7017	25.9561	1	5	5	14.9	249.56	76	1.38761	0.640558
O54946;Q9QYI8	DnaJ homolog subfamily B member 6	Dnajb6	28.2291	27.9567	28.2321	27.6666	27.3729	27.4644	2	10	9	31.5	119.82	98	2.1454	0.638
A2AB59	Rho GTPase-activating protein 27	Arhgap27	24.5262	24.3174	24.642	23.8976	23.7446	23.9475	1	13	13	20.3	53.043	56	2.30088	0.631955
Q3TIV5	Zinc finger CCCH domain-containing protein 15	Zc3h15	27.2833	27.0677	27.3446	26.7075	26.8527	26.2451	1	22	22	47.7	275.48	123	1.45234	0.63009
Q5I1X5	RelA-associated inhibitor	Ppp1r13l	29.7353	29.8507	29.8212	28.8653	29.5278	29.1614	1	35	35	53.9	323.31	310	1.4711	0.617579
Q61686	Chromobox protein homolog 5	Cbx5	25.9514	25.9817	25.7074	25.2344	25.4787	25.0759	1	9	8	51.8	80.148	76	1.87466	0.617175
P54728	UV excision repair protein RAD23 homolog B	Rad23b	31.0781	31.076	30.7472	30.1643	30.5342	30.3674	1	15	12	50	323.31	248	1.78826	0.611799
Q8BZ98	Dynamin-3	Dnm3	25.8279	25.9224	26.1407	25.1832	25.5757	25.3124	1	24	14	25.6	49.366	80	1.8272	0.606577
Q8BVU5	ADP-ribose pyrophosphatase, mitochondrial	Nudt9	28.954	28.5071	28.4249	27.9596	28.0708	28.0434	1	12	12	36.9	58.912	119	1.64329	0.604071
Q8K1A6	Coiled-coil and C2 domain-containing protein 1A	Cc2d1a	25.1519	25.0336	25.6086	24.8698	24.5997	24.5188	1	21	21	24.7	39.924	63	1.3716	0.60197
Q9R1Z7	6-pyruvoyl tetrahydrobiopterin synthase	Pts	28.358	28.3516	28.4037	27.9229	27.5407	27.855	1	6	6	52.1	99.449	60	2.1356	0.598193
Q8BSN5	PHD finger protein 23	Phf23	22.9451	23.3588	23.3441	22.5262	22.7618	22.5724	1	4	4	17.5	27.234	8	1.74913	0.59583
Q6ZPZ3	Zinc finger CCCH domain-containing protein 4	Zc3h4	25.3208	24.8849	25.2996	24.5517	24.7324	24.4468	1	19	19	24.5	259.31	84	1.64034	0.591478
P70670	Nascent polypeptide-associated complex subunit alpha, muscle-specific form	Naca	33.1675	32.9111	33.5425	32.5414	32.7375	32.57	1	109	109	72.7	323.31	1853	1.42279	0.590755
Q5RKZ7	Molybdenum cofactor biosynthesis protein 1;Cyclic pyranopterin monophosphate synthase;Cyclic pyranopterin monophosphate synthase accessory protein	Mocs1	28.7744	28.658	28.6885	28.0039	27.9991	28.3587	1	14	14	28.9	323.31	120	2.03956	0.586428
O54962	Barrier-to-autointegration factor;Barrier-to-autointegration factor, N-terminally processed	Banf1	29.3786	29.3275	28.9237	28.8828	28.3779	28.6415	1	8	8	58.4	210.24	90	1.31658	0.575842
O88974	Histone-lysine N-methyltransferase SETDB1	Setdb1	22.3501	22.4166	22.3617	22.0001	21.5452	21.8597	1	6	6	5.7	5.3621	17	1.8713	0.574472
Q8VHM5		Hnrnpr	28.5844	28.4619	28.8623	28.3036	27.8771	28.0394	1	23	17	43.5	323.31	217	1.51483	0.562855
Q8CHU3	Epsin-2	Epn2	26.8022	26.1988	26.6345	25.905	26.0587	26.0208	1	16	15	38.7	323.31	105	1.38304	0.550318
P51125	Calpastatin	Cast	29.8845	29.6839	30.138	29.2643	29.4237	29.3766	1	37	37	56.5	323.31	490	1.7631	0.547223
Q9CQV7	Mitochondrial import inner membrane translocase subunit TIM14	Dnajc19	28.7338	29.1608	28.7948	28.5322	28.2233	28.3183	1	11	11	79.3	99.072	134	1.53664	0.538511
Q8BMF4	Dihydrolipoyllysine-residue acetyltransferase component of pyruvate dehydrogenase complex, mitochondrial	Dlat	34.7387	34.4688	34.713	34.305	33.8043	34.2044	1	32	32	62.3	323.31	1871	1.421	0.535562
Q9CSU0	Regulation of nuclear pre-mRNA domain-containing protein 1B	Rprd1b	26.0231	26.1929	26.202	25.8812	25.4661	25.4714	1	12	10	48.5	220.08	75	1.63167	0.533124
Q91YL3	Uridine-cytidine kinase-like 1	Uckl1	23.9064	23.7427	23.817	23.4499	22.9445	23.4806	1	12	12	28.1	17.473	29	1.37467	0.5304
Q8VE22	28S ribosomal protein S23, mitochondrial	Mrps23	28.6949	28.5134	28.8857	28.1227	28.1022	28.2849	1	10	10	63.8	220.04	150	1.90728	0.528047
Q9JHS3	Ragulator complex protein LAMTOR2	Lamtor2	29.393	29.0563	29.3189	28.636	28.8395	28.7156	1	7	7	90.4	126.68	122	1.94985	0.525703
Q99J77		Nans	27.0299	26.9996	27.252	26.4297	26.6188	26.6585	1	15	15	61.6	323.31	144	2.1052	0.524836
Q5SF07	Insulin-like growth factor 2 mRNA-binding protein 2	Igf2bp2	27.6102	27.4702	27.9648	27.2488	27.0855	27.1414	1	20	19	38.3	137.68	112	1.556	0.523176
Q9QYS9	Protein quaking	Qki	29.0593	29.146	29.2484	28.954	28.583	28.352	1	16	16	51.6	179.21	192	1.32908	0.521568
O35206	Collagen alpha-1(XV) chain;Restin	Col15a1	31.3838	31.4192	31.7265	31.0938	30.9146	30.9926	1	24	24	25.1	323.31	428	1.87246	0.509494
A2BDX3	Adenylyltransferase and sulfurtransferase MOCS3;Molybdopterin-synthase adenylyltransferase;Molybdopterin-synthase sulfurtransferase	Mocs3	27.2623	26.9281	27.1987	26.8131	26.6644	26.3872	1	21	21	50.7	296.08	126	1.46063	0.508147
Q8K4G1	Latent-transforming growth factor beta-binding protein 4	Ltbp4	28.4959	28.4231	28.8076	28.0797	28.0778	28.0456	1	57	56	45.3	323.31	373	1.89391	0.507823
Q9WUZ7	SH3 domain-binding glutamic acid-rich protein	Sh3bgr	31.1695	31.2859	30.8315	30.5392	30.7055	30.5192	1	11	11	59.8	323.31	374	1.5715	0.507695
Q6PB44	Tyrosine-protein phosphatase non-receptor type 23	Ptpn23	26.8459	26.6446	26.8673	26.4143	25.9958	26.4283	1	41	41	30.1	258.8	175	1.47969	0.506466
Q8BP71;Q8BIF2	RNA binding protein fox-1 homolog 2	Rbfox2	29.4719	29.1577	29.635	29.0376	29.0001	28.7082	2	13	5	38.1	227.4	135	1.35564	0.506245
P15626;F6Y363;O35660	Glutathione S-transferase Mu 2	Gstm2	32.0296	31.8701	31.833	31.5669	31.3239	31.3279	3	20	11	79.8	323.31	554	2.13264	0.504669
Q99KR7	Peptidyl-prolyl cis-trans isomerase F, mitochondrial	Ppif	31.478	31.8979	31.8853	31.2773	31.4021	31.0688	1	11	9	61.7	323.31	398	1.39394	0.504328
Q9D8B3	Charged multivesicular body protein 4b	Chmp4b	29.5	29.5425	29.4927	28.935	29.2492	28.8387	1	13	11	59.8	323.31	156	1.80535	0.504136
Q80VQ1	Leucine-rich repeat-containing protein 1	Lrrc1	24.4791	24.1551	24.6267	24.0976	23.7841	23.8815	1	9	7	24.8	148.94	24	1.39219	0.499264
P49722	Proteasome subunit alpha type-2	Psma2	30.7832	31.0347	30.8495	30.4628	30.4242	30.3111	1	13	13	72.6	323.31	283	2.29305	0.489822
Q9JKB1	Ubiquitin carboxyl-terminal hydrolase isozyme L3	Uchl3	30.6945	30.4471	30.3662	30.0241	30.0894	29.9263	1	18	8	95.2	323.31	281	1.95465	0.489325
Q99JB2	Stomatin-like protein 2, mitochondrial	Stoml2	28.7512	28.7889	29.0152	28.2835	28.3342	28.4825	1	17	17	63.5	323.31	196	2.05227	0.48503
Q8K3J1	NADH dehydrogenase [ubiquinone] iron-sulfur protein 8, mitochondrial	Ndufs8	33.3173	33.2598	33.2253	32.8015	32.7264	32.8237	1	14	14	50.5	323.31	516	3.57885	0.48361
O35972	39S ribosomal protein L23, mitochondrial	Mrpl23	28.632	28.7725	28.3574	28.0273	28.2199	28.069	1	9	9	70.5	113.14	78	1.62878	0.481907
Q62048	Astrocytic phosphoprotein PEA-15	Pea15	27.1406	27.5174	27.3581	26.9199	26.9522	26.7079	1	5	5	49.2	317.52	129	1.63853	0.478715
Q9CY58	Plasminogen activator inhibitor 1 RNA-binding protein	Serbp1	30.7488	30.8141	30.7994	30.3088	30.5313	30.0883	1	27	27	65.1	323.31	381	1.67877	0.477985
Q9CQE8	UPF0568 protein C14orf166 homolog		30.108	30.1946	30.3256	29.6929	30.0026	29.5174	1	15	15	67.2	323.31	225	1.41453	0.471757
Q62165	Dystroglycan;Alpha-dystroglycan;Beta-dystroglycan	Dag1	29.28	29.1028	29.1411	28.5167	28.7459	28.8504	1	22	22	30.6	323.31	239	1.85971	0.470341
Q8BHD7	Polypyrimidine tract-binding protein 3	Ptbp3	25.2511	25.3143	25.5334	24.7901	24.7876	25.1177	1	14	11	38.2	312.55	62	1.5501	0.467824
Q91ZJ5	UTP--glucose-1-phosphate uridylyltransferase	Ugp2	32.5074	32.7227	32.4291	32.2101	32.0101	32.0438	1	32	32	67.9	323.31	888	1.90894	0.465102
Q9DBG5	Perilipin-3	Plin3	32.3742	32.2696	32.3759	31.7769	31.7707	32.0896	1	25	25	83.1	323.31	767	1.8463	0.46081
P81270	Transcriptional regulator ERG	Erg	24.4288	24.4389	24.7022	24.1547	24.1716	23.8677	1	11	10	38.9	79.052	51	1.58171	0.458648
Q99KG3	RNA-binding protein 10	Rbm10	26.2213	26.1954	26.2205	25.7955	26.0147	25.4556	1	19	18	27.1	150.85	90	1.31441	0.457085
Q9CQ79	Thioredoxin domain-containing protein 9	Txndc9	28.1757	28.4587	28.3541	27.8961	28.105	27.6532	1	9	9	37.6	18.636	61	1.34609	0.444717
Q3UGC7	Eukaryotic translation initiation factor 3 subunit J-A	Eif3j1	28.4851	28.5554	28.6641	28.1429	28.1595	28.0708	1	21	2	77	323.31	284	2.78355	0.443796
Q9CQ60	6-phosphogluconolactonase	Pgls	30.8948	31.0438	31.1646	30.459	30.6636	30.6651	1	12	12	85.2	323.31	279	1.87192	0.438503
Q8CIN4;Q61036;O88643	Serine/threonine-protein kinase PAK 2;PAK-2p27;PAK-2p34	Pak2	29.7831	29.543	29.8011	29.3124	29.0705	29.4453	3	27	27	65.6	314.78	265	1.4598	0.433016
A0A087WR45		Prob1	30.2755	30.3835	30.4466	30.0165	29.823	29.9728	1	39	39	51.5	323.31	400	2.30167	0.431084
Q7TQH0	Ataxin-2-like protein	Atxn2l	28.4891	28.0757	28.5614	27.9506	27.9718	27.912	1	34	33	35.7	323.31	250	1.32358	0.430596
Q8BVI4	Dihydropteridine reductase	Qdpr	31.7159	31.6087	31.7673	31.3903	31.1731	31.2476	1	12	12	63.5	323.31	533	2.24584	0.42695
Q61166	Microtubule-associated protein RP/EB family member 1	Mapre1	28.8819	28.8445	28.8378	28.7056	28.2185	28.3605	1	16	14	79.5	323.31	222	1.371	0.426544
P35569	Insulin receptor substrate 1	Irs1	25.1712	25.2566	25.0771	24.7916	24.8987	24.5483	1	16	16	17.8	56.809	47	1.65881	0.422079
Q8BXN7	Protein phosphatase 1K, mitochondrial	Ppm1k	25.8056	25.5238	25.8249	25.4711	25.1686	25.2493	1	10	10	41.4	148.61	76	1.47219	0.421758
Q91XD6	Vacuolar protein-sorting-associated protein 36	Vps36	28.8767	28.8243	29.2003	28.6975	28.5293	28.4334	1	22	22	60.6	323.31	226	1.37333	0.4137
Q8BGC0	HIV Tat-specific factor 1 homolog	Htatsf1	24.9747	25.2485	25.3888	24.826	24.6661	24.8804	1	27	27	44	180.37	89	1.39994	0.41312
Q61239	Protein farnesyltransferase/geranylgeranyltransferase type-1 subunit alpha	Fnta	27.485	27.1369	27.268	26.9117	26.8032	26.9365	1	16	16	49.9	323.31	122	1.70849	0.412855
Q8CBY1	Protein Smaug homolog 1	Samd4a	26.2798	26.3793	26.3435	26.047	25.712	26.0066	1	19	19	39.4	125.21	56	1.70584	0.412356
Q8VIJ6	Splicing factor, proline- and glutamine-rich	Sfpq	30.2024	30.3554	30.3062	29.9795	30.0293	29.6284	1	31	30	52.8	323.31	555	1.42084	0.408932
Q9JJL8	Serine--tRNA ligase, mitochondrial	Sars2	29.1298	29.143	29.3865	28.9391	28.8725	28.6382	1	24	24	58.1	323.31	240	1.50764	0.403142
Q9D1L0;B2RPU8	Coiled-coil-helix-coiled-coil-helix domain-containing protein 2	Chchd2;Zbed5	31.0289	31.1411	31.1365	30.585	30.6524	30.8732	2	5	5	35.3	198.25	188	1.87074	0.398624
P17225;B2RU80	Polypyrimidine tract-binding protein 1	Ptbp1	28.9754	28.9801	28.9989	28.7759	28.3814	28.6072	2	15	12	53.5	323.31	160	1.58957	0.396629
Q3UPL5	Uncharacterized protein C11orf96 homolog	Ag2	25.3281	25.0575	24.8962	24.592	24.8116	24.6923	1	4	4	22.9	10.018	6	1.31243	0.395331
Q99JY0	Trifunctional enzyme subunit beta, mitochondrial;3-ketoacyl-CoA thiolase	Hadhb	35.9964	35.8512	36.0911	35.7894	35.5308	35.4402	1	31	31	73.5	323.31	3381	1.45089	0.392765
Q8CAY6;Q80X81	Acetyl-CoA acetyltransferase, cytosolic	Acat2;Acat3	26.272	26.576	26.5178	26.0649	26.0248	26.1021	2	11	11	47.1	247.58	82	1.82296	0.391312
Q924C5	Alpha-protein kinase 3	Alpk3	27.0616	27.0954	27.4611	26.7385	26.8014	26.9051	1	45	45	39.7	323.31	222	1.33698	0.390992
O54931	A-kinase anchor protein 2	Akap2	28.817	28.6754	28.6493	28.1818	28.4346	28.3523	1	37	37	51.2	323.31	380	1.89924	0.390972
P62627	Dynein light chain roadblock-type 1	Dynlrb1	29.0443	29.2549	29.045	28.6581	28.5791	28.9551	1	7	7	82.3	107.06	152	1.33824	0.383932
Q6PER3	Microtubule-associated protein RP/EB family member 3	Mapre3	28.4092	28.3616	28.2727	27.8827	27.9242	28.0881	1	15	13	64.1	219.01	98	2.17036	0.382825
Q8R1S0	Ubiquinone biosynthesis monooxygenase COQ6, mitochondrial	Coq6	32.6018	32.9582	32.6984	32.4043	32.3028	32.42	1	24	24	64.5	323.31	646	1.54419	0.377154
Q9JLT4	Thioredoxin reductase 2, mitochondrial	Txnrd2	31.7924	31.6469	31.5328	31.2491	31.3845	31.2236	1	24	23	59	323.31	626	1.83498	0.371621
Q8BH95	Enoyl-CoA hydratase, mitochondrial	Echs1	33.787	33.804	33.7557	33.3812	33.5988	33.2822	1	20	20	61	323.31	1117	1.72746	0.361486
Q61656	Probable ATP-dependent RNA helicase DDX5	Ddx5	30.5056	30.1979	30.4294	29.999	29.9939	30.058	1	35	27	55.7	323.31	399	1.72079	0.360667
Q8K4Z5	Splicing factor 3A subunit 1	Sf3a1	28.5725	28.5001	28.7096	28.3317	28.3013	28.0829	1	35	35	51.5	323.31	364	1.63114	0.355428
Q8K3X4	Interferon regulatory factor 2-binding protein-like	Irf2bpl	25.5292	25.7451	25.9147	25.4638	25.3107	25.35	1	19	16	39.1	160.1	99	1.37372	0.354871
Q61171	Peroxiredoxin-2	Prdx2	32.3718	32.5342	32.2848	31.9948	31.9147	32.2188	1	15	15	73.7	323.31	597	1.41288	0.354152
O35864	COP9 signalosome complex subunit 5	Cops5	29.0556	28.8647	28.9537	28.5638	28.6871	28.5659	1	17	17	65.9	259.45	206	2.16782	0.35242
O54724	Polymerase I and transcript release factor	Ptrf	32.568	32.8829	32.7911	32.4916	32.326	32.3682	1	21	21	64	323.31	1084	1.534	0.352039
Q9WUM5	Succinyl-CoA ligase [ADP/GDP-forming] subunit alpha, mitochondrial	Suclg1	35.7619	35.6241	35.6752	35.4274	35.2252	35.3565	1	13	13	36.7	323.31	2524	2.09439	0.350716
Q9D6J6	NADH dehydrogenase [ubiquinone] flavoprotein 2, mitochondrial	Ndufv2	33.121	32.8185	33.086	32.6588	32.5625	32.7533	1	15	15	74.6	323.31	1257	1.47292	0.350302
Q9CXJ1;Q497Y9	Probable glutamate--tRNA ligase, mitochondrial	Ears2	28.9688	28.7595	28.7401	28.382	28.3704	28.6718	2	23	23	45.3	323.31	163	1.32679	0.348095
Q99J45	Nuclear receptor-binding protein	Nrbp1	26.3404	26.2021	26.152	25.7666	25.977	25.9245	1	11	11	29.7	300.13	100	1.8066	0.342156
Q3TLP5	Enoyl-CoA hydratase domain-containing protein 2, mitochondrial	Echdc2	30.3742	30.305	30.5258	29.8893	30.1322	30.17	1	11	11	40.5	323.31	226	1.43495	0.33784
Q9D051	Pyruvate dehydrogenase E1 component subunit beta, mitochondrial	Pdhb	34.6454	34.8935	34.7288	34.5157	34.3298	34.4175	1	22	22	82.5	323.31	3108	1.68106	0.334905
Q9DCA2	28S ribosomal protein S11, mitochondrial	Mrps11	27.3549	27.5551	27.2572	27.1277	27.0302	27.0122	1	6	6	39.8	312.3	117	1.60713	0.332336
P27773	Protein disulfide-isomerase A3	Pdia3	31.5013	31.487	31.4777	31.1556	31.2907	31.0262	1	30	30	59.6	323.31	503	1.90516	0.331155
Q91V64	Isochorismatase domain-containing protein 1	Isoc1	29.3371	29.4273	29.5126	29.0556	29.1003	29.1302	1	13	13	59.3	228.76	205	2.40927	0.330324
Q62407	Striated muscle-specific serine/threonine-protein kinase	Speg	31.5934	31.5159	31.7908	31.2821	31.3851	31.252	1	158	158	59.4	323.31	1521	1.63674	0.326982
Q9WUR9	Adenylate kinase 4, mitochondrial	Ak4	30.9234	30.9733	31.1839	30.772	30.7434	30.5854	1	14	14	70.9	229.09	306	1.5276	0.326607
Q60902	Epidermal growth factor receptor substrate 15-like 1	Eps15l1	29.0249	28.9037	29.0524	28.7151	28.6145	28.6812	1	52	52	74.5	323.31	416	2.39674	0.323405
Q06890	Clusterin;Clusterin beta chain;Clusterin alpha chain	Clu	29.6991	29.7037	29.6579	29.3668	29.5425	29.2047	1	16	16	38.2	323.31	233	1.4826	0.315592
O88746	Target of Myb protein 1	Tom1	29.1653	28.9548	29.2274	28.8358	28.7066	28.861	1	23	23	80.3	323.31	315	1.52384	0.314683
P29788;CON__Q3ZBS7;Q8BP99	Vitronectin	Vtn	28.7161	28.7091	28.6054	28.2635	28.4696	28.3579	3	15	15	32.8	279.6	243	1.96804	0.313218
O35111	Potassium channel subfamily K member 3	Kcnk3	24.2866	24.4109	24.1585	23.9964	24.0461	23.9018	1	2	2	6.8	14.684	13	1.64571	0.303914
Q9R0I7	YLP motif-containing protein 1	Ylpm1	25.8411	25.8712	25.6446	25.4661	25.556	25.4573	1	27	27	25.6	117.9	117	1.7049	0.292494
P48437	Prospero homeobox protein 1	Prox1	22.512	22.6415	22.634	22.4114	22.2049	22.3017	1	5	5	8.5	33.048	12	1.78268	0.289845
P09411;P09041	Phosphoglycerate kinase 1	Pgk1	33.9342	33.8132	33.708	33.5412	33.4365	33.629	2	29	29	75.5	323.31	2038	1.52228	0.282892
P13541;A2AQP0	Myosin-3	Myh3	29.3739	29.2319	29.2732	29.106	28.9666	28.9775	2	43	6	15.5	6.0046	133	1.96313	0.276269
Q8CH40	Nucleoside diphosphate-linked moiety X motif 6	Nudt6	27.3016	27.3087	27.2627	27.0883	26.8599	27.1145	1	14	13	56.2	92.461	108	1.51984	0.270098
Q8R1Q8	Cytoplasmic dynein 1 light intermediate chain 1	Dync1li1	30.0133	29.947	30.2098	29.7069	29.8596	29.835	1	35	33	72.1	323.31	446	1.30465	0.256191
Q99LC5	Electron transfer flavoprotein subunit alpha, mitochondrial	Etfa	35.0044	35.0075	34.7852	34.7068	34.6638	34.6938	1	22	22	80.8	323.31	3066	1.51197	0.244264
Q8K2K6	Arf-GAP domain and FG repeat-containing protein 1	Agfg1	27.5544	27.568	27.5128	27.254	27.4705	27.2048	1	17	16	44.2	323.31	182	1.32289	0.235327
Q91VR2	ATP synthase subunit gamma, mitochondrial	Atp5c1	33.988	33.9333	33.9194	33.7453	33.6712	33.7252	1	15	15	51	177.3	1640	2.80453	0.23296
Q8VCE1	DnaJ homolog subfamily C member 28	Dnajc28	28.3401	28.4002	28.4985	28.2517	28.142	28.1865	1	21	21	61.3	323.31	179	1.76032	0.21949
Q9CR00	26S proteasome non-ATPase regulatory subunit 9	Psmd9	29.4834	29.6056	29.4786	29.3712	29.2198	29.3343	1	11	11	48.6	147.06	140	1.5923	0.214094
P97807	Fumarate hydratase, mitochondrial	Fh	35.9021	35.8428	35.7021	35.6273	35.6283	35.5622	1	31	31	73	323.31	3325	1.53164	0.209768
P67778	Prohibitin	Phb	33.1133	33.2183	33.1226	32.8796	33.044	32.9292	1	23	23	85.7	323.31	805	1.56048	0.20047
Q3UTJ2	Sorbin and SH3 domain-containing protein 2	Sorbs2	33.1132	33.0866	33.2528	33.006	32.9225	32.9293	1	50	49	41.3	323.31	1409	1.56981	0.198269
Q9CPR5	39S ribosomal protein L15, mitochondrial	Mrpl15	28.5912	28.689	28.5707	28.4494	28.3598	28.5152	1	18	18	59.3	191.95	153	1.41068	0.17548
Q9DB77	Cytochrome b-c1 complex subunit 2, mitochondrial	Uqcrc2	35.6425	35.7704	35.6061	35.464	35.5709	35.485	1	28	28	73.5	323.31	3340	1.3081	0.166356
G5E895		Akr1b10	31.0083	30.966	30.9598	31.1756	31.1421	31.0778	1	21	13	61.1	323.31	345	2.04255	-0.153826
Q80XB4	Nebulin-related-anchoring protein	Nrap	30.7411	30.7818	30.6514	30.9531	30.9468	30.8204	1	98	98	63.1	323.31	1066	1.4595	-0.182011
Q99PV0	Pre-mRNA-processing-splicing factor 8	Prpf8	27.1353	27.1519	27.2043	27.3438	27.3765	27.4378	1	55	55	28	162.51	170	2.52365	-0.222207
P60670	Nuclear protein localization protein 4 homolog	Nploc4	27.5985	27.7425	27.7491	27.9032	27.983	27.871	1	27	27	60.7	323.31	177	1.69885	-0.222373
Q8BH64	EH domain-containing protein 2	Ehd2	31.1499	31.3259	31.4126	31.5094	31.5719	31.5102	1	37	35	79.4	323.31	791	1.36825	-0.234376
Q9WVK4	EH domain-containing protein 1	Ehd1	31.6238	31.613	31.5023	31.867	31.7884	31.7939	1	36	22	78.1	323.31	763	2.15746	-0.236699
P24529	Tyrosine 3-monooxygenase	Th	23.0075	23.0564	22.8773	23.2166	23.2031	23.2392	1	8	8	21.9	11.635	21	1.92949	-0.239236
O88569	Heterogeneous nuclear ribonucleoproteins A2/B1	Hnrnpa2b1	31.4463	31.6006	31.6447	31.7447	31.8869	31.7961	1	23	22	69.1	323.31	642	1.5466	-0.24538
P14685	26S proteasome non-ATPase regulatory subunit 3	Psmd3	28.242	28.146	28.0458	28.3127	28.3408	28.536	1	31	31	60.8	323.31	262	1.30819	-0.251929
Q9DBR4	Amyloid beta A4 precursor protein-binding family B member 2	Apbb2	23.2706	23.1378	23.3919	23.5243	23.6446	23.4614	1	12	10	17.9	13.514	22	1.41642	-0.276677
Q6A0A2	La-related protein 4B	Larp4b	26.5356	26.5792	26.4267	26.8463	26.7568	26.7695	1	15	15	21.1	66.599	60	2.18685	-0.277042
Q61768;P28738	Kinesin-1 heavy chain	Kif5b	28.9693	28.8505	28.7994	29.189	29.2073	29.0633	2	54	45	64.4	323.31	432	1.84187	-0.280158
Q9DBM2	Peroxisomal bifunctional enzyme;Enoyl-CoA hydratase/3,2-trans-enoyl-CoA isomerase;3-hydroxyacyl-CoA dehydrogenase	Ehhadh	26.5995	26.8241	26.6966	26.9538	27.0339	26.9785	1	29	29	51.9	295.26	177	1.81914	-0.282032
P28798	Granulins;Acrogranin;Granulin-1;Granulin-2;Granulin-3;Granulin-4;Granulin-5;Granulin-6;Granulin-7	Grn	26.7511	26.6736	26.7015	27.0328	27.1767	26.8264	1	12	12	33.4	259.8	131	1.36019	-0.303242
P24527	Leukotriene A-4 hydrolase	Lta4h	28.4796	28.4457	28.5459	28.8023	28.8111	28.7971	1	33	33	64.5	323.31	327	3.33825	-0.313089
Q3UH60	Disco-interacting protein 2 homolog B	Dip2b	25.4025	25.621	25.3689	25.7235	25.7816	25.8369	1	34	32	28.5	115.68	126	1.68112	-0.316498
P46935;Q8K4P8	E3 ubiquitin-protein ligase NEDD4	Nedd4	28.5216	28.3186	28.3873	28.6717	28.8027	28.71	2	31	27	43.7	323.31	240	1.95933	-0.318977
P47934	Carnitine O-acetyltransferase	Crat	32.1414	32.162	31.9993	32.3212	32.4469	32.4976	1	28	28	51.4	323.31	770	1.92613	-0.32096
Q91ZU6	Dystonin	Dst	27.3446	27.2078	27.3771	27.6611	27.4671	27.7699	1	123	121	21.9	323.31	343	1.4602	-0.322849
E9Q8Q6		Ccdc141	28.0911	27.9761	28.2431	28.4918	28.349	28.5009	1	64	64	50.6	323.31	408	1.7006	-0.343817
Q9JHU4	Cytoplasmic dynein 1 heavy chain 1	Dync1h1	31.4789	31.3632	31.218	31.702	31.5721	31.8255	1	233	233	57.8	323.31	2054	1.5224	-0.346486
Q9D7X8	Gamma-glutamylcyclotransferase	Ggct	26.1001	26.0436	25.9007	26.4597	26.387	26.2402	1	7	7	39.9	55.278	62	1.77886	-0.347518
Q9EPL8	Importin-7	Ipo7	27.494	27.7314	27.8915	28.1023	28.0725	27.9871	1	26	25	35.7	323.31	169	1.35138	-0.34833
Q5EG47	5-AMP-activated protein kinase catalytic subunit alpha-1	Prkaa1	24.4939	24.6306	24.4081	24.9767	24.7095	24.9363	1	19	16	50.4	72.774	56	1.58239	-0.363311
Q505F5	Leucine-rich repeat-containing protein 47	Lrrc47	27.2705	27.0202	27.1384	27.4913	27.5601	27.4819	1	28	28	60.2	323.31	175	2.06897	-0.368053
Q99MN1	Lysine--tRNA ligase	Kars	27.7961	27.9721	27.6462	28.107	28.2554	28.1775	1	27	27	53.1	323.31	212	1.6529	-0.375206
Q9CZJ2	Heat shock 70 kDa protein 12B	Hspa12b	28.0556	27.9733	28.2491	28.445	28.3831	28.5757	1	32	29	54.9	323.31	212	1.7078	-0.375225
Q7TSQ8	Pyruvate dehydrogenase phosphatase regulatory subunit, mitochondrial	Pdpr	29.1034	28.8313	28.9855	29.3809	29.2482	29.4297	1	32	32	42.1	298.88	268	1.78098	-0.379565
Q8R2G4	Ecto-ADP-ribosyltransferase 3	Art3	28.2171	28.1643	28.2498	28.6502	28.4855	28.639	1	13	13	45	258.45	154	2.5382	-0.381173
Q8JZQ2	AFG3-like protein 2	Afg3l2	28.8178	28.8401	29.1194	29.2231	29.3449	29.3697	1	40	36	50.9	323.31	392	1.64736	-0.386787
Q924D0	Reticulon-4-interacting protein 1, mitochondrial	Rtn4ip1	29.3765	29.083	29.5153	29.6709	29.78	29.6865	1	17	17	55.3	323.31	332	1.37192	-0.387515
O08532;Q6PHS9	Voltage-dependent calcium channel subunit alpha-2/delta-1;Voltage-dependent calcium channel subunit alpha-2-1;Voltage-dependent calcium channel subunit delta-1	Cacna2d1	27.6065	27.9152	27.6621	28.242	28.1134	28.0132	2	35	35	38.6	323.31	286	1.56839	-0.394918
P59114	Phosphorylated CTD-interacting factor 1	Pcif1	21.107	21.2008	21.4186	21.6574	21.5643	21.6932	1	3	3	5.4	3.0813	7	1.77881	-0.396166
Q9QXS1;Q8R0W0	Plectin	Plec	32.7192	32.868	32.4483	33.0104	33.1574	33.0614	2	280	279	62.7	323.31	3226	1.42237	-0.397874
Q2NL51	Glycogen synthase kinase-3 alpha	Gsk3a	26.8324	27.0588	26.962	27.5355	27.3116	27.2181	1	15	11	35.3	184.47	116	1.61183	-0.403962
Q02053;P31254	Ubiquitin-like modifier-activating enzyme 1	Uba1	30.7139	30.9068	31.0643	31.2168	31.4617	31.2402	2	51	51	61.1	323.31	717	1.48956	-0.411261
O54988	STE20-like serine/threonine-protein kinase	Slk	26.4758	26.4583	26.5057	26.6335	27.0758	26.9699	1	28	26	27.6	318.94	121	1.43357	-0.413178
O08529	Calpain-2 catalytic subunit	Capn2	28.5593	28.6342	28.5367	28.9683	29.0157	28.9922	1	28	28	53.6	323.31	266	3.66685	-0.415325
P58252	Elongation factor 2	Eef2	31.6762	31.6369	31.801	31.9816	32.1535	32.2368	1	56	55	67.5	323.31	1048	2.01839	-0.419291
P54822	Adenylosuccinate lyase	Adsl	28.6986	29.0371	28.9749	29.3204	29.1579	29.5022	1	24	24	59.9	323.31	292	1.37341	-0.423324
P22892	AP-1 complex subunit gamma-1	Ap1g1	26.8778	26.6105	26.6835	27.0954	27.0379	27.3259	1	23	22	33	166.35	104	1.64766	-0.429126
Q6URW6	Myosin-14	Myh14	29.3611	29.5631	29.2971	29.7202	29.9802	29.8094	1	99	91	53.2	323.31	678	1.749	-0.429472
Q5HZI1	Microtubule-associated tumor suppressor 1 homolog	Mtus1	25.0693	25.2184	25.1966	25.3922	25.7815	25.6004	1	15	15	14.5	93.377	70	1.61665	-0.429927
Q9D880	Mitochondrial import inner membrane translocase subunit TIM50	Timm50	28.1364	27.897	28.2255	28.4784	28.5384	28.5355	1	15	15	48.2	323.31	134	1.90161	-0.431116
O88543	COP9 signalosome complex subunit 3	Cops3	26.7303	26.4994	26.5198	26.9618	26.9333	27.1489	1	14	14	45.6	323.31	139	1.90184	-0.431487
P26516	26S proteasome non-ATPase regulatory subunit 7	Psmd7	30.4149	30.2093	30.3652	30.893	30.9067	30.4845	1	12	12	51.7	323.31	195	1.33135	-0.43163
P13439	Uridine 5-monophosphate synthase;Orotate phosphoribosyltransferase;Orotidine 5-phosphate decarboxylase	Umps	25.118	25.1397	24.6944	25.4469	25.4046	25.3999	1	15	15	42.4	73.385	68	1.38661	-0.433092
Q8BGK2	[Protein ADP-ribosylarginine] hydrolase-like protein 1	Adprhl1	30.2501	30.3674	30.3794	30.7739	30.5036	31.0279	1	23	23	85.6	323.31	394	1.30262	-0.43616
Q99PU8	Putative ATP-dependent RNA helicase DHX30	Dhx30	25.0103	25.2393	25.2013	25.6341	25.6042	25.536	1	22	22	19.9	60.521	59	2.34642	-0.44116
Q8BGI7	Leucine-rich repeat-containing protein 39	Lrrc39	26.7075	26.6641	26.6092	27.3385	26.8473	27.1279	1	14	14	45.7	107.67	113	1.4251	-0.444286
O88342	WD repeat-containing protein 1	Wdr1	30.9243	30.9692	30.6349	31.2392	31.3648	31.2583	1	29	29	69	323.31	522	1.78384	-0.444647
Q9D4H8	Cullin-2	Cul2	26.6176	27.1069	26.8216	27.2787	27.3542	27.2484	1	30	30	45.5	164.46	156	1.42519	-0.445056
Q8VBT1	Beta-taxilin	Txlnb	29.0137	29.1282	28.7292	29.3459	29.5041	29.3643	1	28	28	60.1	323.31	386	1.59542	-0.447706
Q9CQI6	Coactosin-like protein	Cotl1	24.826	24.6574	24.5148	25.203	25.2443	24.8951	1	7	7	57.7	47.775	37	1.46226	-0.448104
Q9Z1Q9	Valine--tRNA ligase	Vars	28.131	28.2742	28.5594	28.9483	28.7601	28.6243	1	51	51	46.6	323.31	348	1.35689	-0.45606
Q8BYL4	Tyrosine--tRNA ligase, mitochondrial	Yars2	26.3556	26.2896	26.0382	26.7608	26.7125	26.5988	1	18	18	48.5	139.67	110	1.8938	-0.462893
Q9CQ91	NADH dehydrogenase [ubiquinone] 1 alpha subcomplex subunit 3	Ndufa3	30.1574	29.9124	30.099	30.3301	30.7084	30.5271	1	4	4	50	215.39	201	1.61594	-0.465609
Q60770	Syntaxin-binding protein 3	Stxbp3	25.8002	25.9808	25.7018	26.2275	26.3279	26.3329	1	17	17	32.1	43.576	92	2.2116	-0.468501
Q60710	Deoxynucleoside triphosphate triphosphohydrolase SAMHD1	Samhd1	26.5822	26.3831	26.8252	27.2317	27.083	26.9163	1	25	25	55	323.31	174	1.42376	-0.480177
Q80W37	Snurportin-1	Snupn	23.8622	23.8352	23.9585	24.4792	24.2302	24.4125	1	8	8	26.8	28.402	33	2.37467	-0.488632
O35609	Secretory carrier-associated membrane protein 3	Scamp3	24.5534	24.871	24.9585	25.2804	25.4724	25.0985	1	9	9	37.5	323.31	49	1.39414	-0.489437
Q3TCH7	Cullin-4A	Cul4a	26.3089	26.7568	26.4051	26.8583	27.0434	27.0417	1	38	23	49.5	213.18	189	1.51829	-0.490833
Q8BG67;Q6ZQ18	Protein EFR3 homolog A	Efr3a	24.7666	24.7761	24.5213	25.2904	25.0272	25.233	2	20	20	30.9	84.318	48	1.89451	-0.495502
Q9EQQ9	Protein O-GlcNAcase	Mgea5	24.9808	25.0532	25.227	25.5821	25.3302	25.8479	1	20	20	31.7	102.27	60	1.40027	-0.499716
P98203	Armadillo repeat protein deleted in velo-cardio-facial syndrome homolog	Arvcf	26.2738	26.1688	26.5507	26.8653	26.9272	26.7029	1	30	30	46	311.38	148	1.71553	-0.500671
Q8BMP6	Golgi resident protein GCP60	Acbd3	25.7864	25.4776	25.4192	26.1487	26.0905	26.0061	1	17	17	41.7	323.31	101	1.89671	-0.520668
Q925F2	Endothelial cell-selective adhesion molecule	Esam	25.929	25.7928	25.4104	26.3246	26.2706	26.102	1	10	10	37.8	140.41	45	1.4348	-0.521669
A2ALK8	Tyrosine-protein phosphatase non-receptor type 3	Ptpn3	21.8382	21.8874	22.2369	22.6957	22.5164	22.3179	1	7	7	9.4	6.4344	11	1.45866	-0.52252
Q8BP67;F6RSK3	60S ribosomal protein L24	Rpl24	27.3425	27.4418	27.1008	27.7152	27.7241	28.0229	2	6	6	35	11.149	78	1.67116	-0.525707
Q8BH24	Transmembrane 9 superfamily member 4	Tm9sf4	24.3844	24.1557	24.0328	24.4077	24.835	24.9198	1	9	9	18.5	12.341	21	1.31304	-0.52988
O70571	[Pyruvate dehydrogenase (acetyl-transferring)] kinase isozyme 4, mitochondrial	Pdk4	29.1647	29.4333	29.7348	30.0264	29.9987	29.9097	1	19	19	64.1	323.31	251	1.47078	-0.534021
Q6GQT9	Nodal modulator 1	Nomo1	28.4167	28.3525	28.2292	28.9058	28.8707	28.8314	1	37	37	42.3	181.46	235	3.08979	-0.536517
Q61102	ATP-binding cassette sub-family B member 7, mitochondrial	Abcb7	26.9867	26.6902	27.0228	27.3853	27.5269	27.4132	1	22	22	43	299.72	136	2.04913	-0.541899
P46460	Vesicle-fusing ATPase	Nsf	27.0779	26.7576	27.0481	27.5491	27.4649	27.4956	1	28	28	45	127.37	139	2.17348	-0.542008
Q91ZB0	Alpha-protein kinase 2	Alpk2	24.7421	24.9388	24.5238	25.3012	25.1758	25.358	1	29	29	18.1	102.89	79	1.84124	-0.543492
Q80UJ7	Rab3 GTPase-activating protein catalytic subunit	Rab3gap1	24.6099	24.299	24.8589	25.2137	25.0434	25.1427	1	20	20	24.9	44.55	54	1.48801	-0.543977
Q8C7J6		Kctd12b	24.5845	24.8096	24.7164	25.2741	25.0807	25.3916	1	9	7	36	52.237	46	2.08871	-0.545295
Q8BU30	Isoleucine--tRNA ligase, cytoplasmic	Iars	27.4466	27.9023	27.8427	28.164	28.2238	28.4555	1	49	49	45.7	250.46	247	1.51167	-0.55063
P61222	ATP-binding cassette sub-family E member 1	Abce1	27.5858	27.5673	27.2563	28.0365	28.0066	28.0434	1	30	30	52.1	323.31	233	2.18606	-0.558991
Q8BI72	CDKN2A-interacting protein	Cdkn2aip	23.3572	23.3268	23.7651	24.0509	23.8525	24.2269	1	8	8	20.2	26.825	25	1.46189	-0.56046
P35441	Thrombospondin-1	Thbs1	23.2345	23.338	23.5361	23.7908	24.1707	23.8456	1	12	6	12.6	51.77	40	1.72902	-0.566174
P70704	Phospholipid-transporting ATPase IA	Atp8a1	24.7411	24.9267	25.3032	25.4207	25.5593	25.6906	1	17	17	17.5	42.101	62	1.44072	-0.566502
Q921M7	Protein FAM49B	Fam49b	25.5065	25.9577	25.9366	26.2688	26.4284	26.4143	1	14	12	56.5	197.32	86	1.66761	-0.570229
Q3U186	Probable arginine--tRNA ligase, mitochondrial	Rars2	25.4319	25.2906	24.9332	25.6396	25.8093	25.9288	1	25	25	48.1	177.01	102	1.55108	-0.574032
Q9JLC8	Sacsin	Sacs	25.6737	25.7045	25.4455	26.1241	26.1085	26.378	1	44	44	11.2	116.27	92	2.1195	-0.595615
Q9QZ73	DCN1-like protein 1	Dcun1d1	23.9561	23.7152	24.0337	24.8213	24.4796	24.1952	1	6	5	27	144.7	32	1.36187	-0.597013
O55029	Coatomer subunit beta	Copb2	27.3051	27.4637	27.2519	27.86	27.9425	28.0225	1	35	35	49.6	323.31	227	2.79578	-0.601463
P62071	Ras-related protein R-Ras2	Rras2	27.0688	27.3288	27.5778	28.0556	27.9735	27.7655	1	10	8	59.8	137.62	125	1.62662	-0.606427
Q61133	Glutathione S-transferase theta-2	Gstt2	25.1123	24.7227	24.9382	25.6437	25.3371	25.6371	1	8	8	41.4	29.62	49	1.81436	-0.61488
Q9ER72	Cysteine--tRNA ligase, cytoplasmic	Cars	24.4731	24.2459	24.1575	24.7316	25.2804	24.7335	1	19	19	25.3	98.223	47	1.41283	-0.622978
P42225	Signal transducer and activator of transcription 1	Stat1	24.6488	24.9933	24.8302	25.5886	25.5606	25.1952	1	20	20	34.8	226.18	89	1.74633	-0.624076
Q8VDD5	Myosin-9	Myh9	30.2741	30.1958	30.524	30.6575	31.188	31.0222	1	99	78	54.4	323.31	889	1.55231	-0.624622
Q8CHS7	Dehydrogenase/reductase SDR family member 7C	Dhrs7c	26.1889	26.3662	26.2313	26.7747	26.6398	27.2472	1	13	13	51.1	201.76	125	1.50745	-0.625083
P61600	N-alpha-acetyltransferase 20	Naa20	22.6425	22.6041	23.2202	23.6081	23.403	23.3403	1	6	6	39.9	15.695	38	1.36451	-0.628192
Q505D7	Optic atrophy 3 protein homolog	Opa3	28.6256	27.9493	28.2835	28.964	28.9814	28.8173	1	6	6	43	167.01	66	1.45838	-0.634785
Q3TIR3;Q80XE1	Synembryn-A	Ric8a	23.5556	23.2758	23.6552	24.2216	24.1944	23.9829	2	9	9	20.4	70.491	24	2.02303	-0.637412
F7BJK1		Pcdh1	23.6917	23.9498	23.9893	24.6839	24.5649	24.3048	1	12	12	14.5	81.81	50	1.93138	-0.64094
Q62177	Semaphorin-3B	Sema3b	20.7078	20.3218	20.2481	21.098	21.2519	20.8778	1	3	3	4.1	3.6057	9	1.65359	-0.65004
Q3TFQ1	SPRY domain-containing protein 7	Spryd7	24.9366	25.3972	24.9279	25.4089	25.8667	25.9383	1	7	7	37.2	64.049	47	1.34089	-0.650748
Q9JHU9	Inositol-3-phosphate synthase 1	Isyna1	26.9778	27.1855	26.8719	27.8249	27.8629	27.3082	1	17	17	39.7	235.84	118	1.50263	-0.653622
Q3UHD2;Q9CYH5	Glucose-fructose oxidoreductase domain-containing protein 1	Gfod1	27.1168	26.5458	26.9147	27.4001	27.5442	27.6123	2	9	9	24.4	35.687	48	1.67978	-0.659759
Q91WT7		Akr1c14	24.4644	24.0104	24.1339	25.0212	24.6718	24.9204	1	10	10	38.4	30.543	36	1.76134	-0.668236
Q8C3Q9	Caspase-9;Caspase-9 subunit p35;Caspase-9 subunit p10	Casp9	20.744	20.6047	20.9656	21.4618	21.404	21.4749	1	3	3	6.8	6.6265	7	2.48709	-0.675473
P54265	Myotonin-protein kinase	Dmpk	22.9604	23.3199	23.4539	23.9241	24.065	23.777	1	13	12	27.3	90.13	41	1.79352	-0.67729
Q8VDL4	ADP-dependent glucokinase	Adpgk	24.0463	24.0097	23.4326	24.6643	24.6351	24.2293	1	9	9	28.6	45.648	43	1.3092	-0.680051
P61255	60S ribosomal protein L26	Rpl26	27.7816	27.1584	27.2282	27.9473	27.926	28.3612	1	9	9	44.8	26.45	106	1.32804	-0.688779
P63087	Serine/threonine-protein phosphatase PP1-gamma catalytic subunit	Ppp1cc	22.6866	23.2432	23.4668	23.9324	23.8435	23.7155	1	20	4	72.1	99.682	24	1.35773	-0.698282
Q80W14	Pre-mRNA-processing factor 40 homolog B	Prpf40b	19.7829	20.1756	19.8055	20.387	20.9929	20.4923	1	8	7	10.7	7.053	10	1.44416	-0.702737
Q5U458	DnaJ homolog subfamily C member 11	Dnajc11	28.417	28.2323	28.4634	28.7802	29.095	29.3493	1	26	26	50.1	323.31	207	1.76712	-0.703915
Q9EP89	Serine beta-lactamase-like protein LACTB, mitochondrial	Lactb	27.9653	28.3164	28.1045	28.9401	29.1397	28.4445	1	19	19	43.7	323.31	222	1.43767	-0.712693
P51863	V-type proton ATPase subunit d 1	Atp6v0d1	24.0815	23.8058	24.3965	24.7477	24.7595	24.9153	1	10	10	42.5	139.67	41	1.78616	-0.712913
Q64338;Q61481;Q01065	Calcium/calmodulin-dependent 3,5-cyclic nucleotide phosphodiesterase 1C	Pde1c	23.6263	24.1125	24.0708	24.6405	24.8407	24.4782	3	13	13	25.8	152.44	38	1.72618	-0.716551
P31428	Dipeptidase 1	Dpep1	27.2236	27.0777	26.6618	27.3634	27.7962	27.958	1	17	17	56.3	323.31	128	1.37115	-0.71822
Q2TBE6	Phosphatidylinositol 4-kinase type 2-alpha	Pi4k2a	23.5242	24.071	24.0439	24.4178	24.4809	24.8973	1	10	10	30.3	20.858	33	1.43521	-0.718983
Q6PDI6	Protein FAM63B	Fam63b	20.2055	20.2025	20.0591	20.9174	21.244	20.4869	1	6	6	13.3	25.637	15	1.49872	-0.72708
P36916	Guanine nucleotide-binding protein-like 1	Gnl1	26.1364	26.3277	25.7555	27.1351	26.7225	26.5666	1	18	18	32.6	90.885	92	1.43134	-0.734869
P70698	CTP synthase 1	Ctps1	27.5901	27.9479	27.9041	28.9158	28.272	28.4725	1	26	24	55.7	241.67	171	1.54184	-0.739421
Q52KR3	Protein prune homolog 2	Prune2	24.2535	23.5186	24.1455	24.6229	24.6985	24.8207	1	14	14	6.3	39.448	51	1.45722	-0.741468
Q3U2I3	FTS and Hook-interacting protein	Fam160a2	22.8935	22.4454	23.2252	23.4864	23.6128	23.7045	1	9	9	14.1	17.363	23	1.47519	-0.746553
Q9CQF9	Prenylcysteine oxidase	Pcyox1	26.7771	26.9524	27.0241	27.2745	27.8302	27.8895	1	19	19	52.3	323.31	167	1.63163	-0.746906
Q9D517	1-acyl-sn-glycerol-3-phosphate acyltransferase gamma	Agpat3	27.0166	27.5181	27.5273	27.7873	28.1217	28.3943	1	16	16	35.1	72.681	81	1.42776	-0.747088
Q8R0Y8	Mitochondrial coenzyme A transporter SLC25A42	Slc25a42	28.5204	28.9126	28.3601	29.2965	29.1974	29.541	1	15	15	56.3	323.31	204	1.74348	-0.74731
Q8JZM0	Dimethyladenosine transferase 1, mitochondrial	Tfb1m	23.331	23.7067	23.2396	23.9131	24.2227	24.3884	1	8	8	28.1	20.914	29	1.70121	-0.748976
Q3TZZ7	Extended synaptotagmin-2	Esyt2	24.0368	24.3934	24.2755	24.6361	25.1909	25.1262	1	14	14	27.7	35.975	45	1.66958	-0.749172
Q18PE0	Protein Dok-7	Dok7	24.1067	23.8698	23.7781	24.7983	24.8074	24.4008	1	9	9	30.4	103.35	36	1.97304	-0.750687
O70622	Reticulon-2	Rtn2	28.3558	28.6352	28.0293	28.6957	29.3372	29.244	1	5	5	17.2	247.48	69	1.32433	-0.75222
Q99L88	Beta-1-syntrophin	Sntb1	24.4814	24.2405	24.7364	25.3851	25.0666	25.2788	1	18	16	44.5	85.25	63	1.94134	-0.757358
P84091	AP-2 complex subunit mu	Ap2m1	27.2142	27.2836	27.3608	27.9886	28.3258	27.8612	1	20	20	48.3	142.09	138	2.22429	-0.772356
Q8BH58	TIP41-like protein	Tiprl	24.508	24.1399	24.3671	24.7974	25.3703	25.1688	1	11	11	51.7	231.23	75	1.75091	-0.773856
Q80ZJ8	EF-hand calcium-binding domain-containing protein 4A	Cracr2b	20.0564	20.4246	20.3542	21.0916	21.1206	20.9758	1	3	3	10.7	4.5572	7	2.53197	-0.784263
Q91ZX7	Prolow-density lipoprotein receptor-related protein 1;Low-density lipoprotein receptor-related protein 1 85 kDa subunit;Low-density lipoprotein receptor-related protein 1 515 kDa subunit;Low-density lipoprotein receptor-related protein 1 intracellular domain	Lrp1	24.5693	24.5761	24.4656	25.2814	25.438	25.2695	1	39	39	10.6	124.3	88	3.58576	-0.792635
Q8R4H2	Rho guanine nucleotide exchange factor 12	Arhgef12	25.1267	24.7162	25.0227	25.6125	25.962	25.7023	1	28	28	23.1	179.62	82	2.11603	-0.803722
Q9CZX7	Type 2 phosphatidylinositol 4,5-bisphosphate 4-phosphatase	Tmem55a	22.0449	22.3684	22.589	23.4801	22.7415	23.2112	1	7	6	46.7	33.212	19	1.41096	-0.810165
Q9CQ56	Vesicle transport protein USE1	Use1	23.1929	23.899	23.8095	24.2662	24.2952	24.7792	1	7	7	32.2	23.834	29	1.36887	-0.813026
Q80Y56	Rabenosyn-5	Rbsn	22.6904	23.0814	22.5196	23.3704	23.6937	23.6814	1	12	12	20.6	63.646	26	1.84632	-0.818055
Q8BVY0	Ribosomal L1 domain-containing protein 1	Rsl1d1	25.2755	24.6093	24.5936	25.9017	25.4875	25.5463	1	9	9	29.9	129.04	41	1.46553	-0.819036
O88983	Syntaxin-8	Stx8	25.6495	25.5329	26.2058	26.4884	26.5825	26.7898	1	6	6	26.7	21.512	25	1.66149	-0.824145
Q9Z0W3	Nuclear pore complex protein Nup160	Nup160	24.3159	23.3949	23.7956	24.8744	24.4749	24.6454	1	13	13	12.3	134.32	36	1.33513	-0.829411
Q8BIK4;A2AF47	Dedicator of cytokinesis protein 9	Dock9	22.5936	23.3697	23.4154	23.8275	24.1463	23.9132	2	17	17	11.7	22.703	38	1.37824	-0.836064
Q9ES03	T-box transcription factor TBX20	Tbx20	24.3406	24.7282	23.9299	25.4188	25.0067	25.0838	1	8	8	24.7	24.05	31	1.47592	-0.83687
Q64133	Amine oxidase [flavin-containing] A	Maoa	22.8478	21.9427	22.4026	23.1471	23.2086	23.3568	1	5	5	11.4	4.3327	10	1.45229	-0.839801
Q9ESJ0	Exportin-4	Xpo4	20.8543	21.4281	21.4565	21.7297	22.3913	22.1935	1	6	6	7.3	4.7641	11	1.43912	-0.858532
Q8C129	Leucyl-cystinyl aminopeptidase	Lnpep	27.5131	27.418	28.0127	28.4513	28.3556	28.7182	1	27	27	35.7	323.31	265	1.80004	-0.860427
P14094	Sodium/potassium-transporting ATPase subunit beta-1	Atp1b1	29.3465	29.7983	28.7682	30.0814	30.0945	30.3293	1	13	13	50	115.58	123	1.31058	-0.86406
Q99LJ7	RCC1 and BTB domain-containing protein 2	Rcbtb2	23.6583	23.0144	22.7678	23.9515	24.2145	23.8746	1	9	8	19.2	24.045	29	1.41749	-0.866763
Q9WVT6	Carbonic anhydrase 14	Ca14	23.7079	22.9099	23.6003	24.0624	24.1939	24.5684	1	9	9	35.6	21.037	31	1.38653	-0.868881
Q9JL62	Glycolipid transfer protein	Gltp	22.4113	22.3393	21.9283	23.4197	23.1481	22.7464	1	5	5	23	3.7451	19	1.62747	-0.878461
P51949	CDK-activating kinase assembly factor MAT1	Mnat1	21.5845	21.8579	21.9892	22.5101	22.6994	22.8687	1	7	7	24.6	9.3249	19	2.29821	-0.882213
Q8C2E7	WASH complex subunit strumpellin	Kiaa0196	22.359	22.6091	21.9611	23.1939	23.2295	23.1625	1	11	11	10.5	9.2649	19	2.02102	-0.885557
Q9WV32	Actin-related protein 2/3 complex subunit 1B	Arpc1b	26.4466	26.6461	26.5503	27.4457	27.603	27.2608	1	15	13	47.6	229.77	92	2.82922	-0.888834
P07742	Ribonucleoside-diphosphate reductase large subunit	Rrm1	23.2285	23.0724	23.0394	24.6009	23.5204	23.9631	1	10	10	15.5	16.283	28	1.34113	-0.914687
Q6ZPU9	KIF1-binding protein	Kbp	22.6259	22.5588	21.9026	23.1287	23.2037	23.544	1	12	12	30	56.652	35	1.6137	-0.929727
Q9D3B1	Very-long-chain (3R)-3-hydroxyacyl-CoA dehydratase 2	Hacd2	22.9073	22.4996	23.0891	24.162	23.2613	23.8715	1	2	2	8.7	4.8466	5	1.37184	-0.932882
Q9CZR2;O35409	N-acetylated-alpha-linked acidic dipeptidase 2	Naalad2	24.4403	24.4435	24.6657	25.7091	25.5674	25.0722	2	14	14	21.5	77.391	69	1.96824	-0.933083
Q04736	Tyrosine-protein kinase Yes	Yes1	25.8713	25.5231	26.0302	26.6295	26.9207	26.68	1	11	4	21.8	10.628	45	2.23172	-0.935209
P56960	Exosome component 10	Exosc10	21.0229	21.3541	21.2128	21.6249	22.37	22.466	1	4	4	6.8	4.9591	4	1.55885	-0.957041
Q8BGV0	Probable asparagine--tRNA ligase, mitochondrial	Nars2	24.9884	24.7581	24.8057	25.3427	26.2203	25.8937	1	13	13	29.8	140.98	58	1.6606	-0.96818
P60766	Cell division control protein 42 homolog	Cdc42	26.5782	26.2761	26.5224	26.8785	27.7777	27.637	1	7	6	44	265.63	79	1.52544	-0.972178
O70423;Q812C9	Membrane primary amine oxidase	Aoc3	24.7374	24.5014	24.0517	25.1015	25.2458	25.8757	2	16	16	28.5	92.544	51	1.45749	-0.977479
Q9D7F7	Charged multivesicular body protein 4c	Chmp4c	22.4546	21.4876	21.8908	22.6754	23.3592	22.765	1	8	6	35.3	41.726	19	1.31173	-0.988845
Q9EP69	Phosphatidylinositide phosphatase SAC1	Sacm1l	26.2595	26.5404	26.0749	27.2215	27.1082	27.5134	1	25	25	45.7	85.405	120	2.26092	-0.989414
Q9CR67	Transmembrane protein 33	Tmem33	24.7877	25.2273	24.5879	25.9591	25.3766	26.264	1	5	5	19	57.211	23	1.44357	-0.99895
P54729	NEDD8 ultimate buster 1	Nub1	23.897	24.7533	24.204	25.1181	25.4195	25.3166	1	15	15	27.7	88.259	47	1.70557	-0.999976
Q9CQX2	Cytochrome b5 type B	Cyb5b	26.0015	25.2922	25.4059	26.1048	26.5696	27.048	1	8	8	63.7	294.38	88	1.34604	-1.00761
P08032	Spectrin alpha chain, erythrocytic 1	Spta1	27.1613	26.872	26.4651	27.9344	27.7039	27.8886	1	95	94	53.1	323.31	396	2.03772	-1.00954
P10922	Histone H1.0;Histone H1.0, N-terminally processed	H1f0	28.343	28.8436	28.2155	29.0395	29.5322	29.8839	1	6	6	27.8	26.942	65	1.51273	-1.01782
Q9QXY9	Peroxisomal biogenesis factor 3	Pex3	20.9792	20.7768	20.9355	21.7013	22.0882	21.9677	1	4	4	9.9	3.4827	9	2.85155	-1.02187
Q8C6Y6	Ankyrin repeat and SOCS box protein 14	Asb14	21.6938	21.6677	20.9626	22.5723	22.7684	22.0641	1	3	3	5.8	2.0722	5	1.49307	-1.02693
P21447;P06795;P21440;B5X0E4	Multidrug resistance protein 1A;Multidrug resistance protein 1B	Abcb1a;Abcb1b	22.3117	22.4519	23.1186	23.1473	23.806	24.0222	4	17	16	17	51.397	51	1.33217	-1.0311
Q922Q1;Q9CW42	Mitochondrial amidoxime reducing component 2	2019-03-02	24.7021	24.571	25.4158	25.5514	26.2997	25.9474	2	10	10	28.1	116.63	50	1.41912	-1.03651
Q8VD26	Transmembrane protein 143	Tmem143	27.468	27.7433	27.7811	28.5304	28.4916	29.0928	1	11	11	25.5	241.73	113	2.05577	-1.04078
O09110	Dual specificity mitogen-activated protein kinase kinase 3	Map2k3	24.3162	25.4101	24.9831	26.0934	25.8713	25.9034	1	15	11	49.3	54.452	57	1.49609	-1.05288
Q9R0M4	Podocalyxin	Podxl	25.5008	25.4213	24.5456	26.0378	26.5665	26.0298	1	8	8	19.9	171.34	62	1.39137	-1.05543
Q61165	Sodium/hydrogen exchanger 1	Slc9a1	21.7748	22.1425	22.3539	22.5358	23.2354	23.7128	1	5	5	10.1	10.235	9	1.31502	-1.07091
Q8K190	SAYSvFN domain-containing protein 1	Saysd1	20.5291	19.4882	20.0782	20.8404	21.5629	20.9514	1	2	2	11.2	7.7566	6	1.35115	-1.08638
P82347	Delta-sarcoglycan	Sgcd	26.9454	26.2827	27.232	27.4071	28.2208	28.0918	1	10	10	40.8	99.397	72	1.34468	-1.08657
Q64449	C-type mannose receptor 2	Mrc2	22.3751	21.2366	22.2056	22.7823	23.0274	23.2873	1	5	5	3.9	10.248	14	1.33404	-1.09325
Q8BUY5	Complex I assembly factor TIMMDC1, mitochondrial	Timmdc1	25.2974	24.5452	25.4223	26.5304	26.2168	25.8099	1	9	9	35.1	153.26	69	1.47758	-1.09741
Q8CGB3	Uveal autoantigen with coiled-coil domains and ankyrin repeats	Uaca	23.1047	22.6199	22.7771	24.4649	23.5537	23.8059	1	15	15	12.3	71.954	33	1.64632	-1.10755
Q6PIE5	Sodium/potassium-transporting ATPase subunit alpha-2	Atp1a2	27.9873	27.3594	27.4147	28.2065	29.1926	28.6984	1	43	25	50.6	309.09	167	1.47975	-1.11203
Q61830	Macrophage mannose receptor 1	Mrc1	24.0017	24.4078	23.9949	24.9907	25.3584	25.3923	1	25	25	21.1	65.689	68	2.39237	-1.11233
Q9ET30	Transmembrane 9 superfamily member 3	Tm9sf3	23.3549	24.2631	23.609	24.9014	24.7736	24.8893	1	7	7	13.3	20.467	30	1.8161	-1.11241
Q8VBZ3	Cleft lip and palate transmembrane protein 1 homolog	Clptm1	24.049	23.9807	24.3574	24.7723	25.8215	25.1424	1	10	10	18.7	49.898	34	1.56423	-1.11637
P15864	Histone H1.2	Hist1h1c	28.0225	27.9695	27.1882	28.4297	28.9974	29.1435	1	8	4	30.7	10.333	59	1.50767	-1.13008
Q01341;P84309	Adenylate cyclase type 6	Adcy6	24.135	23.7816	23.3272	24.8973	24.6379	25.1524	2	10	10	11.4	27.815	20	1.84387	-1.14793
Q69Z99	Zinc finger protein 512	Znf512	23.3859	23.027	22.7783	24.419	23.6017	24.6376	1	5	5	11.6	8.3949	15	1.48259	-1.1557
Q80ZW2	Protein THEM6	Them6	20.559	19.7939	20.5605	21.179	21.8922	21.3312	1	4	4	23.2	8.7375	10	1.59291	-1.16301
Q8C0L0	Thioredoxin-related transmembrane protein 4	Tmx4	25.176	25.2104	25.7407	26.7887	26.9263	25.9115	1	7	7	26.6	32.26	33	1.47513	-1.16641
A0A0B4J1J0		Igkv4-50	21.6435	21.6763	21.1093	23.0474	22.3187	22.62	1	2	2	25.6	5.4708	4	1.87482	-1.18565
P23708	Nuclear transcription factor Y subunit alpha	Nfya	22.0309	22.7719	22.7785	23.3067	23.7493	24.1402	1	2	2	11.6	133.48	26	1.59812	-1.20497
O09118;Q9R1A3	Netrin-1	Ntn1	23.3363	23.4843	23.5638	24.3964	24.6915	24.9497	2	8	8	15.6	40.561	30	2.66627	-1.21771
Q9CY57	Chromatin target of PRMT1 protein	Chtop	23.1681	23.6969	23.81	24.4164	25.0318	24.8939	1	5	5	20.5	50.929	38	1.96449	-1.22233
P41317	Mannose-binding protein C	Mbl2	21.5639	22.4826	21.8349	23.632	23.2957	22.6214	1	5	5	25.8	24.33	18	1.41237	-1.22259
Q99JX7	Nuclear RNA export factor 1	Nxf1	21.4744	21.4818	21.2883	22.8498	22.601	22.4724	1	9	9	19.1	12.862	17	3.18376	-1.22624
A0A087WP46		BC034090	21.6566	21.0671	21.0131	22.3557	22.3151	22.7778	1	7	7	8.4	12.365	12	2.08744	-1.23729
P97742	Carnitine O-palmitoyltransferase 1, liver isoform	Cpt1a	25.6838	24.7455	25.2694	26.4338	26.4814	26.5988	1	19	17	28.3	64.005	68	2.00194	-1.27179
Q6PHQ8	N-alpha-acetyltransferase 35, NatC auxiliary subunit	Naa35	22.8073	23.2362	23.2335	24.4532	24.8606	23.8334	1	13	13	22.6	15.365	25	1.75552	-1.2901
Q924C1	Exportin-5	Xpo5	22.6701	23.4585	23.325	24.3127	24.0487	25.0029	1	11	11	11	69.4	26	1.59622	-1.30355
E9Q474		Akap13	22.6744	21.9781	21.7362	23.3381	23.7742	23.1899	1	18	18	8.6	22.835	26	1.76914	-1.30451
P63321	Ras-related protein Ral-A	Rala	24.2727	25.0119	25.0052	26.2071	25.4185	26.6123	1	6	3	38.3	15.275	48	1.43109	-1.31606
P35293	Ras-related protein Rab-18	Rab18	25.3967	24.5486	24.8139	25.7837	26.5059	26.4259	1	11	11	64.6	129.2	68	1.75195	-1.3188
Q99PP9	Tripartite motif-containing protein 16	Trim16	20.6554	19.8964	19.6373	20.7433	21.6977	21.7215	1	4	4	7.9	6.9895	6	1.39132	-1.32446
Q99LI7	Cleavage stimulation factor subunit 3	Cstf3	22.4885	22.9823	23.2656	24.601	23.7692	24.3637	1	13	13	24.8	27.91	27	1.78087	-1.33255
Q9QUJ7;Q9CZW4	Long-chain-fatty-acid--CoA ligase 4	Acsl4	22.6103	21.8428	22.2275	23.437	23.7227	23.5378	2	11	11	17.4	8.8758	16	2.31667	-1.33894
E9QMW4	Uncharacterized protein C16orf96 homolog		25.61	25.1255	25.3157	26.8175	26.9849	26.3759	1	2	2	2.5	1.8595	21	2.40663	-1.37571
Q8BYK4	Retinol dehydrogenase 12	Rdh12	25.0784	25.7568	24.1413	26.5722	26.4193	26.1418	1	2	2	4.7	1.5942	12	1.33658	-1.38562
P70399	Tumor suppressor p53-binding protein 1	Tp53bp1	20.3935	20.6826	20.9955	21.638	21.8105	22.8215	1	9	9	8.3	25.689	22	1.57618	-1.39945
Q9D7E3	Ovarian cancer-associated gene 2 protein homolog	Ovca2	24.7419	24.6161	24.0408	26.4352	25.7622	25.4579	1	4	4	24	49.105	25	1.76908	-1.41886
E9Q555	E3 ubiquitin-protein ligase RNF213	Rnf213	23.5224	23.4757	22.7108	24.627	24.5312	24.8643	1	10	10	2.8	16.407	19	2.16057	-1.43786
Q921L3	Transmembrane and coiled-coil domain-containing protein 1	Tmco1	24.9354	25.1685	25.2633	26.6457	26.5422	26.6972	1	2	2	12.2	44.909	21	3.82107	-1.506
Q62086	Serum paraoxonase/arylesterase 2	Pon2	23.6064	24.3079	23.6406	25.4431	25.0612	25.5761	1	7	7	30.8	17.14	33	2.26583	-1.5085
Q91XB7	Protein YIF1A	Yif1a	21.2714	19.7798	20.068	21.827	21.6052	22.231	1	3	3	14	9.7825	13	1.43158	-1.51465
Q922S4	cGMP-dependent 3,5-cyclic phosphodiesterase	Pde2a	22.4524	23.3464	21.6048	23.8873	23.7047	24.3774	1	12	12	17.6	56.403	26	1.3163	-1.52196
Q99ME9	Nucleolar GTP-binding protein 1	Gtpbp4	23.4721	22.891	23.686	24.997	24.2305	25.5539	1	8	8	13.7	8.584	14	1.60232	-1.57742
Q9Z2H5	Band 4.1-like protein 1	Epb41l1	21.3505	20.0179	20.8734	21.9129	22.8079	22.3661	1	8	5	11	17.321	19	1.58549	-1.61502
Q9CQP2;Q8R3W2	Trafficking protein particle complex subunit 2	Trappc2;0610009B22Rik	22.7626	22.1407	23.5114	24.4781	23.9568	24.8477	2	3	3	24.3	29.258	22	1.57621	-1.62264
Q9JI59	Junctional adhesion molecule B	Jam2	20.5506	20.6167	20.8589	22.3966	22.5756	22.1823	1	4	4	17.8	13.91	7	3.5011	-1.70944
A0A075B5L1		Igkv10-94	22.1917	21.0073	20.9218	23.2021	22.8727	23.2804	1	2	1	37.4	32.181	4	1.8185	-1.7448
Q8C0K5	Graves disease carrier protein homolog	Slc25a16	22.0638	22.2853	22.0219	23.785	23.8037	24.0816	1	7	7	21.7	8.0338	21	3.82322	-1.76645
Q9CZR3	Mitochondrial import receptor subunit TOM40B	Tomm40l	22.7716	21.4849	22.4367	24.0502	24.1208	23.9445	1	6	6	19.8	19.17	29	2.01463	-1.80744
Q64735	Complement component receptor 1-like protein	Cr1l	23.9233	24.2651	24.7197	26.1622	26.2414	26.0214	1	7	7	18.6	67.894	32	2.81084	-1.839
Q80ZJ6	Protein zer-1 homolog	Zer1	21.2071	20.5711	22.1187	23.101	23.3962	23.1331	1	8	8	11.9	51.812	21	1.85146	-1.91114
Q9D162	Coiled-coil domain-containing protein 167	Ccdc167	20.2063	20.0475	19.3952	21.5643	22.5359	21.53	1	2	2	26.8	10.801	2	2.07293	-1.99374
Q8BXN9	Transmembrane protein 87A	Tmem87a	19.4001	19.5482	18.6272	21.4619	21.4743	20.6267	1	2	2	5	3.5895	7	2.12127	-1.99575
Q9Z2C4	Myotubularin-related protein 1	Mtmr1	19.8981	22.0572	21.5882	23.0931	23.4283	23.0662	1	6	6	12.6	12.503	9	1.40942	-2.01466
Q0VGB7	Serine/threonine-protein phosphatase 4 regulatory subunit 2	Ppp4r2	19.4476	20.6032	21.2106	22.3256	22.6887	22.4402	1	6	6	18.7	44.306	17	1.75929	-2.06434
Q8R149	BUD13 homolog	Bud13	21.7609	19.5599	20.706	22.3934	23.2203	22.645	1	5	5	11.5	6.8375	7	1.41998	-2.07731
Q3TNH5	Protein FAM172A	Fam172a	20.0019	19.2336	21.264	21.8188	23.1347	21.8103	1	2	2	9.1	11.042	3	1.32526	-2.08808
Q9WTK3	Glycosylphosphatidylinositol anchor attachment 1 protein	Gpaa1	20.9991	21.0262	19.4651	23.6474	22.0698	22.3957	1	2	2	3.7	1.5995	5	1.45367	-2.20744
O35598	Disintegrin and metalloproteinase domain-containing protein 10	Adam10	21.4044	22.3742	20.6942	23.6205	23.7929	24.322	1	5	5	7.6	6.7617	11	1.98612	-2.42092
Q9DC16	Endoplasmic reticulum-Golgi intermediate compartment protein 1	Ergic1	22.2527	23.662	21.2322	24.0947	25.7498	24.5832	1	5	5	22.4	45.903	9	1.3232	-2.42697
Q9D968	Host cell factor 2	Hcfc2	18.3741	19.5613	19.1263	20.8263	21.9353	21.6865	1	2	2	10.4	3.1254	3	2.15576	-2.46209
Q6ZQL4	WD repeat-containing protein 43	Wdr43	21.1632	21.5369	19.1285	23.7139	22.4179	23.2744	1	5	5	12.1	9.532	8	1.40229	-2.52585
Q7TPD3	Roundabout homolog 2	Robo2	20.5686	22.8214	20.1595	24.0889	23.1742	23.9123	1	2	2	2	1.8394	4	1.35948	-2.54199
Q6Y5D8	Rho GTPase-activating protein 10	Arhgap10	20.2978	21.1618	22.062	22.9994	24.0836	24.1075	1	3	3	4.2	2.5948	5	1.82038	-2.55629
B2KF50		Uhrf1bp1	18.9556	18.4884	19.2287	20.5178	22.7217	21.1866	1	4	4	3.4	5.824	6	1.70409	-2.58447
P11627	Neural cell adhesion molecule L1	L1cam	19.7434	17.8594	17.3051	21.3722	21.5088	20.0181	1	6	6	6.2	6.8887	7	1.41302	-2.66373
Q8VEH3	ADP-ribosylation factor-like protein 8A	Arl8a	18.9281	20.2434	21.3681	22.8037	23.8376	21.958	1	9	2	51.1	3.6961	3	1.40616	-2.68657
Q6PF93	Phosphatidylinositol 3-kinase catalytic subunit type 3	Pik3c3	22.4095	24.6143	21.963	26.269	26.1577	25.0333	1	5	5	8.7	3.1874	8	1.44315	-2.82442
Q8C050	Ribosomal protein S6 kinase alpha-5	Rps6ka5	18.8702	19.6942	20.9252	21.9405	23.2978	23.0608	1	5	4	7.1	7.2692	8	1.80215	-2.93651
Q8K2V1	Serine/threonine-protein phosphatase 4 regulatory subunit 1	Ppp4r1	19.8026	21.2619	20.8449	23.4483	23.9031	23.4063	1	3	3	3.8	2.3668	7	2.50951	-2.94945
Q8BK75	Elongator complex protein 6	Elp6	19.076	19.5407	20.594	23.3534	21.6644	23.3005	1	2	2	7.1	1.659	7	1.88257	-3.03583
Q9QXG2;Q9QZD5	Rab proteins geranylgeranyltransferase component A 1	Chm	20.2167	19.1738	22.4665	23.682	24.4626	22.8407	2	5	5	8.4	7.2693	15	1.32082	-3.04273
Q62470	Integrin alpha-3;Integrin alpha-3 heavy chain;Integrin alpha-3 light chain	Itga3	20.8306	21.4956	19.1787	23.7775	23.6606	23.4371	1	4	4	4	1.6053	6	1.96163	-3.1234
Q8CJG1	Protein argonaute-1	Ago1	20.6614	22.5151	20.3314	23.7859	24.1052	25.019	1	21	6	30	21.097	16	1.81088	-3.13407
Q8BG07	Phospholipase D4	Pld4	20.807	19.2626	19.4839	23.3461	22.9069	23.1847	1	4	4	9.5	12.904	9	2.5646	-3.29475
Q99ME2	WD repeat-containing protein 6	Wdr6	18.8259	20.4589	18.8043	22.9486	22.1884	23.0609	1	3	3	4.6	18.291	4	2.27344	-3.3696
E9QAF4		Phldb3	19.1895	21.6825	20.4343	25.3837	24.5306	25.3829	1	2	2	4.2	2.2687	6	2.41813	-4.66363
Q5QNQ9	Collagen alpha-1(XXVII) chain	Col27a1	20.9163	19.409	19.5677	26.7759	24.6825	22.4553	1	2	2	1.4	1.7242	2	1.60321	-4.67362
