# Supplementary material for: Endothelial EphB4 maintains vascular integrity and transport function in adult heart
Source: eLife. 2019 Nov 29;8:e45863. doi: 10.7554/eLife.45863 (PMC6884395; doi:10.7554/eLife.45863)
Supplement: Figure 6—source data 1. [file elife-45863-fig6-data1.xlsx]

## Sheet: Fig.6
	Figure 6–source data 1
	Source data for Figure 6B.
	Relative quantitation of pAkt / Akt, pERK1/2 / ERK1/2, pSrc / Src and pSrc / Src / input lysates from HUVECs stimulated with Ctrl Fc, B2/Fc and B4/Fc and treated with LY294002, U0126, PP2 or DMSO.
6B	WB:							6B	WB:
	Fc stimulation_LY294002_ pAkt / Akt	Ctrl Fc DMSO	Ctrl Fc LY294002	B2/Fc DMSO	B2/Fc LY294002	B4/Fc DMSO	B4/Fc LY294002		Fc stimulation_PP2_ pSrc / Src	Ctrl Fc DMSO	Ctrl Fc PP2	B2/Fc DMSO	B2/Fc PP2	B4/Fc DMSO	B4/Fc PP2
	(relative to GAPDH)	1.02438	0.0039406	1.17299	0.0155533	0.975864	0.0124016		(relative to GAPDH)	0.964768	0.292142	1.64743	0.530943	1.29069	0.416025
		0.975617	0.00634275	1.45832	0.0101794	0.816698	0.00749496			1.03523	0.259977	1.28741	0.286328	1.73895	0.570458
		1	0.0447237	1.54147	0.0619281	1.27694	0.0822053			0.849211	0.310315	1.43032	0.427466	1.39774	0.686089
										1.15079	0.319947	1.31612	0.429296	1.40041	0.843402
	one-way ANOVA									1	0.137014	1.62137	0.10932
	Table Analyzed	LY294002 pAkt / Akt
									one-way ANOVA
	One-way ANOVA	Ordinary							Table Analyzed	PP2 pSrc / Src
	Alpha	0.05
									One-way ANOVA	Ordinary
									Alpha	0.05
	Compare column means (main column effect)
	Number of families	1							Compare column means (main column effect)
	Number of comparisons per family	5
	Alpha	0.05							Number of families	1
									Number of comparisons per family	5
	Sidak's multiple comparisons test	Mean Diff,	95,00% CI of diff,	Significant?	Summary	Adjusted P Value			Alpha	0.05
	Ctrl Fc DMSO vs. Ctrl Fc LY294002	0.9817	0,6679 to 1,295	Yes	****	<0,0001
	B2/Fc DMSO vs. B2/Fc LY294002	1.362	1,048 to 1,675	Yes	****	<0,0001			Sidak's multiple comparisons test	Mean Diff,	95,00% CI of diff,	Significant?	Summary	Adjusted P Value
	B4/Fc DMSO vs. B4/Fc LY294002	0.9891	0,6754 to 1,303	Yes	****	<0,0001			Ctrl Fc DMSO vs. Ctrl Fc PP2	0.7361	0,4679 to 1,004	Yes	****	<0,0001
	Ctrl Fc DMSO vs. B2/Fc DMSO	-0.3909	-0,7047 to -0,07715	Yes	*	0.0128			B2/Fc DMSO vs. B2/Fc PP2	1.104	0,8356 to 1,372	Yes	****	<0,0001
	Ctrl Fc DMSO vs. B4/Fc DMSO	-0.02317	-0,3369 to 0,2906	No	ns	0.9998			B4/Fc DMSO vs. B4/Fc PP2	0.828	0,5280 to 1,128	Yes	****	<0,0001
									Ctrl Fc DMSO vs. B2/Fc DMSO	-0.4605	-0,7288 to -0,1923	Yes	***	0.0004
									Ctrl Fc DMSO vs. B4/Fc DMSO	-0.4569	-0,7415 to -0,1724	Yes	***	0.0009
6B	WB:
	Fc stimulation_U0126 _pERK1/2 / ERK1/2	Ctrl Fc DMSO	Ctrl Fc U0126	B2/Fc DMSO	B2/Fc U0126	B4/Fc DMSO	B4/Fc U0126
	(relative to VINCULIN)	1.14849	0.080881	0.616204	0.029647	0.896862	0.0300658	6B	WB:
		0.851506	0.0674271	0.340747	0.0334382	0.739088	0.0185426		Fc stimulation_PP2_ pSrc / Src/ input	Ctrl Fc DMSO	Ctrl Fc PP2	B2/Fc DMSO	B2/Fc PP2	B4/Fc DMSO	B4/Fc PP2
		1.11034	0.0655114	0.268403	0.0260655	1.494	0.0663501		(relative to GAPDH)	1.02038	0.30021	1.77176	0.670353	1.62507	0.537381
		0.88966	0.0547042	0.284189	0.0505975	1.32579	0.0306215			0.97962	0.285032	1.47781	0.349807	2.18102	0.977033
										0.938124	0.231537	1.26545	0.367072	1.15614	0.597171
	one-way ANOVA									1.06188	0.289009	1.07812	0.385058	1.10897	0.943996
	Table Analyzed	U0126 pERK1/2 / ERK1/2								1	0.162452	1.79948	0.0946552
	One-way ANOVA	Ordinary							one-way ANOVA
	Alpha	0.05							Table Analyzed	PP2 pSrc / Src / input
									One-way ANOVA	Ordinary
	Compare column means (main column effect)								Alpha	0.05
	Number of families	1
	Number of comparisons per family	5							Compare column means (main column effect)
	Alpha	0.05
									Number of families	1
	Sidak's multiple comparisons test	Mean Diff,	95,00% CI of diff,	Significant?	Summary	Adjusted P Value			Number of comparisons per family	5
	Ctrl Fc DMSO vs. Ctrl Fc U0126	0.9329	0,5860 to 1,280	Yes	****	<0,0001			Alpha	0.05
	B2/Fc DMSO vs. B2/Fc U0126	0.3424	-0,004456 to 0,6894	No	ns	0.054
	B4/Fc DMSO vs. B4/Fc U0126	1.078	0,7306 to 1,424	Yes	****	<0,0001			Sidak's multiple comparisons test	Mean Diff,	95,00% CI of diff,	Significant?	Summary	Adjusted P Value
	Ctrl Fc DMSO vs. B2/Fc DMSO	0.6226	0,2757 to 0,9695	Yes	***	0.0003			Ctrl Fc DMSO vs. Ctrl Fc PP2	0.7464	0,2840 to 1,209	Yes	***	0.0008
	Ctrl Fc DMSO vs. B4/Fc DMSO	-0.1139	-0,4608 to 0,2330	No	ns	0.8914			B2/Fc DMSO vs. B2/Fc PP2	1.105	0,6428 to 1,567	Yes	****	<0,0001
									B4/Fc DMSO vs. B4/Fc PP2	0.7539	0,2370 to 1,271	Yes	**	0.0024
									Ctrl Fc DMSO vs. B2/Fc DMSO	-0.4785	-0,9409 to -0,01616	Yes	*	0.0401
									Ctrl Fc DMSO vs. B4/Fc DMSO	-0.5178	-1,008 to -0,02739	Yes	*	0.0351
	Because the statistical chosen test did not show the obvious difference presented by WB, we decided to do for B2/Fc DMSO vs. B2/Fc U0126 another test. We used ttest with Welch's correction
	Table Analyzed	B2/Fc with DMSO or U0126
	Column B	B2/Fc U0126
	vs.	vs.
	Column A	B2/Fc DMSO
	Unpaired t test with Welch's correction
	P value	0.024
	P value summary	*
	Significantly different (P < 0.05)?	Yes
	One- or two-tailed P value?	Two-tailed
	Welch-corrected t, df	t=4.213, df=3.027
	How big is the difference?
	Mean of column A	0.3774
	Mean of column B	0.03494
	Difference between means (B - A) ± SEM	-0.3424 ± 0.08129
	95% confidence interval	-0.5998 to -0.08505
	R squared (eta squared)	0.8543
	F test to compare variances
	F, DFn, Dfd	222.9, 3, 3
	P value	0.001
	P value summary	**
	Significantly different (P < 0.05)?	Yes
	Data analyzed
	Sample size, column A	4
	Sample size, column B	4
