# Supplementary material for: Endothelial EphB4 maintains vascular integrity and transport function in adult heart
Source: eLife. 2019 Nov 29;8:e45863. doi: 10.7554/eLife.45863 (PMC6884395; doi:10.7554/eLife.45863)
Supplement: Figure 7—figure supplement 1—source data 1. [file elife-45863-fig7-figsupp1-data1.xlsx]

## Sheet: Tabelle1
	Figure7–figure supplement 1–source data 1
	Source data for Figure 7–figure supplement 1B.
	Quantitation of CD36 immunosignal in golgi of HUVECs treated with siControl, siEPHB4 or siCAV1.
7S1B	IF_CD36_IntDen_Golgi
	KD	siControl	siEPHB4	siCAV1
		1	1.30518	1.76297
		1	1.57999	1.2443
		1	1.82224	1.69077
	Ordinary one-way ANOVA
	Table Analyzed	CD36 - Golgi
	Data sets analyzed	A-C
	ANOVA summary
	F	6.626
	P value	0.0303
	P value summary	*
	Significant diff. among means (P < 0.05)?	Yes
	R square	0.6883
	Number of families	1
	Number of comparisons per family	2
	Alpha	0.05
	Sidak's multiple comparisons test	Mean Diff,	95,00% CI of diff,	Significant?	Summary	Adjusted P Value
	siControl vs. siEPHB4	-0.5691	-1,102 to -0,03645	Yes	*	0.0387
	siControl vs. siCAV1	-0.566	-1,099 to -0,03332	Yes	*	0.0395
