# Supplementary material for: Endothelial EphB4 maintains vascular integrity and transport function in adult heart
Source: eLife. 2019 Nov 29;8:e45863. doi: 10.7554/eLife.45863 (PMC6884395; doi:10.7554/eLife.45863)
Supplement: Figure 7—source data 1. [file elife-45863-fig7-data1.xlsx]

## Sheet: Fig.7C
	Figure7–source data 1
	Source data for Figure 7C.
	Quantitation of immunoblots for levels of EphB4, CAV1, pCAV1, CD36, pSrc / Src and ratio of pSrc / Src / input in HUVECs treated with siControl, siEPHB4 or siCAV1.
7C	WB_EPHB4							7C	WB_CAV1
	KD	siControl	siEPHB4	siCAV1					KD	siControl	siEPHB4	siCAV1
	(relative protein level to GAPDH)	0.856311	0.0274453	1.26822					(relative protein level to GAPDH)	1.11272	0.696777	0.344041
		0.921408	0.0155478	1.3605						1.05431	0.601848	0.43738
		1.22228	0.013701	1.10358						0.832968	0.739233	0.385035
	Ordinary one-way ANOVA								Ordinary one-way ANOVA
	ANOVA summary								Table Analyzed	CAV1
	F	68.68							Data sets analyzed	A-C
	P value	<0.0001
	P value summary	****							ANOVA summary
	Significant diff. among means (P < 0.05)?	Yes							F	29.09
	R square	0.9581							P value	0.0008
									P value summary	***
									Significant diff. among means (P < 0.05)?	Yes
									R square	0.9065
	Number of families	1							Number of families	1
	Number of comparisons per family	2							Number of comparisons per family	2
	Alpha	0.05							Alpha	0.05
	Sidak's multiple comparisons test	Mean Diff,	95,00% CI of diff,	Significant?	Summary	Adjusted P Value			Sidak's multiple comparisons test	Mean Diff,	95,00% CI of diff,	Significant?	Summary	Adjusted P Value
	siControl vs. siEPHB4	0.9811	0,6537 to 1,309	Yes	***	0.0002			siControl vs. siEPHB4	0.3207	0,08353 to 0,5579	Yes	*	0.0142
	siControl vs. siCAV1	-0.2441	-0,5715 to 0,08334	No	ns	0.1343			siControl vs. siCAV1	0.6112	0,3740 to 0,8484	Yes	***	0.0005
7C	WB_pCAV1							7C	WB_pSrc / Src / input
	KD	siControl	siEPHB4	siCAV1					KD	siControl	siEPHB4	siCAV1
	(relative protein level to GAPDH)	0.978104	0.68892	0.1897					(SRC IP protein relative to SRC input)	0.867889	0.71479	1.06237
		1.00628	0.643987	0.198832						0.999885	0.870049	1.16281
		1.01561	0.489409	0.192009						1.13223	0.79418	1.10142
	Ordinary one-way ANOVA								Ordinary one-way ANOVA
	Table Analyzed	pCAV1							Table Analyzed	pSrc / Src / input
	Data sets analyzed	A-C							Data sets analyzed	A-C
	ANOVA summary								ANOVA summary
	F	128.9							F	8.891
	P value	<0.0001							P value	0.0161
	P value summary	****							P value summary	*
	Significant diff. among means (P < 0.05)?	Yes							Significant diff. among means (P < 0.05)?	Yes
	R square	0.9773							R square	0.7477
	Number of families	1							Number of families	1
	Number of comparisons per family	2							Number of comparisons per family	2
	Alpha	0.05							Alpha	0.05
	Sidak's multiple comparisons test	Mean Diff,	95,00% CI of diff,	Significant?	Summary	Adjusted P Value			Sidak's multiple comparisons test	Mean Diff,	95,00% CI of diff,	Significant?	Summary	Adjusted P Value
	siControl vs. siEPHB4	0.3926	0,2439 to 0,5412	Yes	***	0.0005			siControl vs. siEPHB4	0.207	-0,01817 to 0,4322	No	ns	0.0681
	siControl vs. siCAV1	0.8065	0,6578 to 0,9551	Yes	****	<0,0001			siControl vs. siCAV1	-0.1089	-0,3340 to 0,1163	No	ns	0.364
7C	WB_pSrc / Src							7C	WB_CD36
	KD	siControl	siEPHB4	siCAV1					KD	siControl	siEPHB4	siCAV1
	(pSRC IP protein relative to SRC IP protein)	0.870161	0.633335	1.01528					(relative protein level to GAPDH)	0.972145	1.13753	1.22071
		1.0253	0.79617	1.06729						1.00147	1.07434	1.18424
		1.10454	0.658915	0.923829						1.02638	1.09661	1.17779
	Ordinary one-way ANOVA								Ordinary one-way ANOVA
	Table Analyzed	pSrc / Src							Table Analyzed	CD36
	Data sets analyzed	A-C							Data sets analyzed	A-C
	ANOVA summary								ANOVA summary
	F	10.27							F	36.96
	P value	0.0115							P value	0.0004
	P value summary	*							P value summary	***
	Significant diff. among means (P < 0.05)?	Yes							Significant diff. among means (P < 0.05)?	Yes
	R square	0.774							R square	0.9249
	Number of families	1							Number of families	1
	Number of comparisons per family	2							Number of comparisons per family	2
	Alpha	0.05							Alpha	0.05
	Sidak's multiple comparisons test	Mean Diff,	95,00% CI of diff,	Significant?	Summary	Adjusted P Value			Sidak's multiple comparisons test	Mean Diff,	95,00% CI of diff,	Significant?	Summary	Adjusted P Value
	siControl vs. siEPHB4	0.3039	0,07401 to 0,5337	Yes	*	0.0157			siControl vs. siEPHB4	-0.1028	-0,1697 to -0,03594	Yes	**	0.0078
	siControl vs. siCAV1	-0.002133	-0,2320 to 0,2277	No	ns	0.9996			siControl vs. siCAV1	-0.1942	-0,2611 to -0,1274	Yes	***	0.0003
