# Supplementary material for: Endothelial EphB4 maintains vascular integrity and transport function in adult heart
Source: eLife. 2019 Nov 29;8:e45863. doi: 10.7554/eLife.45863 (PMC6884395; doi:10.7554/eLife.45863)
Supplement: Figure 7—source data 2. [file elife-45863-fig7-data2.xlsx]

## Sheet: Fig.7E
	Figure7–source data 2
	Source data for Figure 7E.
	Quantitation of CAV1, pCAV1 and CD36 immunosignal in whole cell of HUVECs treated with siControl, siEPHB4 or siCAV1.
7E	IF_CAV1_MFI								7E	IF_pCAV1_MFI
	KD	siControl	siEPHB4	siCAV1						KD	siControl	siEPHB4	siCAV1
		1	0.62185	0.289761							1	0.67512	0.510095
		1	0.615742	0.333688							1	0.649458	0.525182
		1	0.802527	0.427956							1	0.714866	0.51813
	Ordinary one-way ANOVA									Ordinary one-way ANOVA
	Table Analyzed	Cav1 MFI								Table Analyzed	pCav1 MFI
	Data sets analyzed	A-C								Data sets analyzed	A-C
	ANOVA summary									ANOVA summary
	F	58.43								F	474.1
	P value	0.0001								P value	<0,0001
	P value summary	***								P value summary	****
	Significant diff. among means (P < 0.05)?	Yes								Significant diff. among means (P < 0.05)?	Yes
	R square	0.9512								R square	0.9937
	Number of families	1								Number of families	1
	Number of comparisons per family	2								Number of comparisons per family	2
	Alpha	0.05								Alpha	0.05
	Sidak's multiple comparisons test	Mean Diff,	95,00% CI of diff,	Significant?	Summary	Adjusted P Value				Sidak's multiple comparisons test	Mean Diff,	95,00% CI of diff,	Significant?	Summary	Adjusted P Value
	siControl vs. siEPHB4	0.32	0,1422 to 0,4978	Yes	**	0.0036				siControl vs. siEPHB4	0.3202	0,2730 to 0,3673	Yes	****	<0,0001
	siControl vs. siCAV1	0.6495	0,4717 to 0,8273	Yes	****	<0,0001				siControl vs. siCAV1	0.4822	0,4350 to 0,5294	Yes	****	<0,0001
7E	IF_CD36_MFI_whole_cell								7E	IF_CD36_MFI_surface
	KD	siControl	siEPHB4	siCAV1						KD	siControl	siEPHB4	siCAV1
		1	1.01881	1.0351							1	0.363547	0.343183
		1	0.908089	0.815586							1	0.491184	0.525347
		1	1.01719	0.97081							1	0.741247	0.885108
											1	0.533363	0.321256
	Ordinary one-way ANOVA									Ordinary one-way ANOVA
	Table Analyzed	CD36 MFI								Table Analyzed	CD36 surface MFI
	Data sets analyzed	A-C								Data sets analyzed	A-C
	ANOVA summary									ANOVA summary
	F	0.4973								F	9.726
	P value	0.6312								P value	0.0056
	P value summary	ns								P value summary	**
	Significant diff. among means (P < 0.05)?	No								Significant diff. among means (P < 0.05)?	Yes
	R square	0.1422								R square	0.6837
	Number of families	1								Number of families	1
	Number of comparisons per family	2								Number of comparisons per family	2
	Alpha	0.05								Alpha	0.05
	Sidak's multiple comparisons test	Mean Diff,	95,00% CI of diff,	Significant?	Summary	Adjusted P Value				Sidak's multiple comparisons test	Mean Diff,	95,00% CI of diff,	Significant?	Summary	Adjusted P Value
	siControl vs. siEPHB4	0.01863	-0,1620 to 0,1992	No	ns	0.9473				siControl vs. siEPHB4	0.4677	0,1350 to 0,8003	Yes	**	0.0089
	siControl vs. siCAV1	0.0595	-0,1211 to 0,2401	No	ns	0.5997				siControl vs. siCAV1	0.4813	0,1486 to 0,8139	Yes	**	0.0075
