# Supplementary material for: Endothelial EphB4 maintains vascular integrity and transport function in adult heart
Source: eLife. 2019 Nov 29;8:e45863. doi: 10.7554/eLife.45863 (PMC6884395; doi:10.7554/eLife.45863)
Supplement: Figure 8—figure supplement 1—source data 1. [file elife-45863-fig8-figsupp1-data1.xlsx]

## Sheet: Fig.8-figure supplement 1
	Figure 8–figure supplement 1–source data 1
	Source data for Figure 8–figure supplement 1A, B.
	Quantitation of cell size in KD and Fc-stimulation experiments.
8/S1A	Norm. Cell size	siControl	siEPHB4	siCAV1
	KD	1	1.27441	1.27684
		1	1.40185	1.20826
		1	1.32642	1.30534
	One-way ANOVA
	Table Analyzed	Cell size
	Data sets analyzed	A-C
	ANOVA summary
	F	42.33
	P value	0.0003
	P value summary	***
	Significant diff. among means (P < 0.05)?	Yes
	R square	0.9338
	Number of families	1
	Number of comparisons per family	2
	Alpha	0.05
	Sidak's multiple comparisons test	Mean Diff,	95,00% CI of diff,	Significant?	Summary	Adjusted P Value
	siControl vs. siEPHB4	-0.3342	-0,4475 to -0,2209	Yes	***	0.0002
	siControl vs. siCAV1	-0.2635	-0,3768 to -0,1502	Yes	***	0.0009
8/S1B	Norm. Cell size	Ctrl-FC DMSO	B2-FC DMSO	B4-FC DMSO	Ctrl-FC LY294002	B2-FC LY294002	B4-FC LY294002	Ctrl-FC PP2	B2-FC PP2	B4-FC PP2	Ctrl-FC U0126	B2-FC U0126	B4-FC U0126
	Fc stimulation + inhibitors	1	1.10544	0.972138	0.996547	1.00442	1.00096	0.948895	0.974508	0.929778	0.999556	0.989323	0.988001
	(Norm. Int. Density	1	0.933014	0.84348	0.974444	0.961751	0.984186	0.971894	0.946817	0.877159	1.13986	0.954053	1.03835
		1	1.0585	1.06911	0.922502	1.19095	1.11553	1.11883	0.860612	1.00853	1.07773	1.03119	1.05745
	One-way ANOVA
	Table Analyzed	Fc stim.cell size
	One-way ANOVA	Ordinary
	Alpha	0.05
	Number of families	1
	Number of comparisons per family	17
	Alpha	0.05
	Sidak's multiple comparisons test	Mean Diff,	95,00% CI of diff,	Significant?	Summary	Adjusted P Value
	Ctrl-FC DMSO vs. B2-FC DMSO	-0.03232	-0,2530 to 0,1884	No	ns	0.9993
	Ctrl-FC DMSO vs. B4-FC DMSO	0.03842	-0,1823 to 0,2591	No	ns	0.9979
	Ctrl-FC LY294002 vs. B2-FC LY294002	-0.08788	-0,3086 to 0,1328	No	ns	0.8297
	Ctrl-FC LY294002 vs. B4-FC LY294002	-0.06906	-0,2897 to 0,1516	No	ns	0.9412
	Ctrl-FC DMSO vs. Ctrl-FC LY294002	0.0355	-0,1852 to 0,2562	No	ns	0.9987
	B2-FC DMSO vs. B2-FC LY294002	-0.02006	-0,2407 to 0,2006	No	ns	>0,9999
	B4-FC DMSO vs. B4-FC LY294002	-0.07198	-0,2927 to 0,1487	No	ns	0.9283
	Ctrl-FC PP2 vs. B2-FC PP2	0.08589	-0,1213 to 0,2930	No	ns	0.8012
	Ctrl-FC PP2 vs. B4-FC PP2	0.07472	-0,1324 to 0,2819	No	ns	0.8869
	Ctrl-FC DMSO vs. Ctrl-FC PP2	-0.01321	-0,2204 to 0,1939	No	ns	>0,9999
	B2-FC DMSO vs. B2-FC PP2	0.105	-0,1021 to 0,3122	No	ns	0.6171
	B4-FC DMSO vs. B4-FC PP2	0.02309	-0,1841 to 0,2302	No	ns	0.9999
	Ctrl-FC U0126 vs. B2-FC U0126	0.08086	-0,1005 to 0,2622	No	ns	0.7424
	Ctrl-FC U0126 vs. B4-FC U0126	0.04445	-0,1369 to 0,2258	No	ns	0.9837
	Ctrl-FC DMSO vs. Ctrl-FC U0126	-0.07238	-0,2537 to 0,1090	No	ns	0.8282
	B2-FC DMSO vs. B2-FC U0126	0.0408	-0,1406 to 0,2221	No	ns	0.99
	B4-FC DMSO vs. B4-FC U0126	-0.06636	-0,2477 to 0,1150	No	ns	0.8796
