# Supplementary material for: Endothelial EphB4 maintains vascular integrity and transport function in adult heart
Source: eLife. 2019 Nov 29;8:e45863. doi: 10.7554/eLife.45863 (PMC6884395; doi:10.7554/eLife.45863)
Supplement: Figure 8—figure supplement 1—source data 2. [file elife-45863-fig8-figsupp1-data2.xlsx]

## Sheet: Tabelle1
	Figure 8–figure supplement 1–source data 1
	Source data for Figure 8–figure supplement 1C.
	Quantitation of CAV1 and CD36 immunosignal in HUVECs stimulated with Ctrl Fc, B2/Fc and B4/Fc and treated with LY294002, U0126, PP2 or DMSO.
8/S1C	IF_CAV1	Ctrl-FC DMSO	B2-FC DMSO	B4-FC DMSO	Ctrl-FC LY294002	B2-FC LY294002	B4-FC LY294002	Ctrl-FC PP2	B2-FC PP2	B4-FC PP2	Ctrl-FC U0126	B2-FC U0126	B4-FC U0126
	Fc stimulation + inhibitors	1	0.943454	0.894902	0.859862	0.71238	0.8653	0.930399	0.682501	0.712627	0.957687	0.803997	0.816853
	(Norm. Int. Density	1	1.07035	0.944735	0.952345	0.970029	1.07323	0.840005	0.842339	0.763451	0.762615	0.948475	0.961575
		1	1.10028	1.25213	1.25211	1.24	1.41643	1.13214	1.37299	1.26202	1.51146	1.40426	1.26452
	One-way ANOVA
	Table Analyzed	Cav1 IntDen
	One-way ANOVA	Ordinary
	Alpha	0.05
	Number of families	1
	Number of comparisons per family	7
	Alpha	0.05
	Sidak's multiple comparisons test	Mean Diff,	95,00% CI of diff,	Significant?	Summary	Adjusted P Value
	Ctrl-FC DMSO vs. B2-FC DMSO	-0.03803	-0,6163 to 0,5402	No	ns	>0,9999
	Ctrl-FC DMSO vs. B4-FC DMSO	-0.03059	-0,6089 to 0,5477	No	ns	>0,9999
	Ctrl-FC PP2 vs. B2-FC PP2	0.001571	-0,5767 to 0,5798	No	ns	>0,9999
	Ctrl-FC PP2 vs. B4-FC PP2	0.05481	-0,5235 to 0,6331	No	ns	>0,9999
	Ctrl-FC DMSO vs. Ctrl-FC PP2	0.03249	-0,5458 to 0,6108	No	ns	>0,9999
	B2-FC DMSO vs. B2-FC PP2	0.07209	-0,5062 to 0,6504	No	ns	0.9998
	B4-FC DMSO vs. B4-FC PP2	0.1179	-0,4604 to 0,6962	No	ns	0.9944
8/S1C	IF_CD36	Ctrl-FC DMSO	B2-FC DMSO	B4-FC DMSO	Ctrl-FC LY294002	B2-FC LY294002	B4-FC LY294002	Ctrl-FC PP2	B2-FC PP2	B4-FC PP2	Ctrl-FC U0126	B2-FC U0126	B4-FC U0126
	Fc stimulation + inhibitors	1	1.01719	1.18407	1.24125	1.00143	1.04981	0.736471	0.997862	0.882364	1.16235	1.02879	0.92864
	(Norm. Int. Density	1	0.810272	0.763568	0.728749	0.754118	0.769307	0.974763	0.874231	0.736263	1.21584	1.12968	0.971239
		1	1.0886	0.817849	1.19445	1.14014	0.997846	0.892184	0.944104	1.03546	1.13256	1.17514	0.843227
	One-way ANOVA
	Table Analyzed	CD36 IntDen
	One-way ANOVA	Ordinary
	Alpha	0.05
	Number of families	1
	Number of comparisons per family	7
	Alpha	0.05
	Sidak's multiple comparisons test	Mean Diff,	95,00% CI of diff,	Significant?	Summary	Adjusted P Value
	Ctrl-FC DMSO vs. B2-FC DMSO	0.02798	-0,3350 to 0,3909	No	ns	>0,9999
	Ctrl-FC DMSO vs. B4-FC DMSO	0.07817	-0,2848 to 0,4411	No	ns	0.9923
	Ctrl-FC PP2 vs. B2-FC PP2	-0.07093	-0,4339 to 0,2920	No	ns	0.9957
	Ctrl-FC PP2 vs. B4-FC PP2	-0.01689	-0,3799 to 0,3461	No	ns	>0,9999
	Ctrl-FC DMSO vs. Ctrl-FC PP2	0.1322	-0,2308 to 0,4952	No	ns	0.882
	B2-FC DMSO vs. B2-FC PP2	0.03329	-0,3297 to 0,3963	No	ns	>0,9999
	B4-FC DMSO vs. B4-FC PP2	0.03714	-0,3258 to 0,4001	No	ns	>0,9999
