# Supplementary material for: Endothelial EphB4 maintains vascular integrity and transport function in adult heart
Source: eLife. 2019 Nov 29;8:e45863. doi: 10.7554/eLife.45863 (PMC6884395; doi:10.7554/eLife.45863)
Supplement: Figure 8—source data 1. [file elife-45863-fig8-data1.xlsx]

## Sheet: Fig.8B,G
	Figure 8–source data 1
	Source data for Figure 8B, F.
	Quantitation of Western blots results for pCAV1 and pCAV1 / CAV1 (B) and CD36 (G) in HUVECs stimulated with Ctrl Fc, B2/Fc or B4/Fc in combination with DMSO or PP2.
8B	WB:
	Fc stimulation
	PP2 pCAV1	Ctrl Fc DMSO	Ctrl Fc PP2	B2/Fc DMSO	B2/Fc PP2	B4/Fc DMSO	B4/Fc PP2
	(relative to GAPDH)	0.92366	0.58904	1.49	0.344232	0.778117	0.196138
		1.07634	0.544637	1.41019	0.287197	0.918094	0.193548
		1	0.558909	1.35589	0.384988	1.06853	0.579825
	One-way ANOVA
	Table Analyzed	PP2 pCAV1
	One-way ANOVA	Ordinary
	Alpha	0.05
	Number of families	1
	Number of comparisons per family	5
	Alpha	0.05
	Sidak's multiple comparisons test	Mean Diff,	95,00% CI of diff,	Significant?	Summary	Adjusted P Value
	Ctrl Fc DMSO vs. Ctrl Fc PP2	0.4358	0,1421 to 0,7295	Yes	**	0.0035
	B2/Fc DMSO vs. B2/Fc PP2	1.08	0,7862 to 1,374	Yes	****	<0,0001
	B4/Fc DMSO vs. B4/Fc PP2	0.5984	0,3047 to 0,8921	Yes	***	0.0002
	Ctrl Fc DMSO vs. B2/Fc DMSO	-0.4187	-0,7124 to -0,1250	Yes	**	0.0048
	Ctrl Fc DMSO vs. B4/Fc DMSO	0.07842	-0,2153 to 0,3721	No	ns	0.941
8B	WB:
	Fc stimulation	Ctrl Fc DMSO	Ctrl Fc PP2	B2/Fc DMSO	B2/Fc PP2	B4/Fc DMSO	B4/Fc PP2
	PP2 pCAV1 / CAV1	0.946368	0.510348	1.74157	0.431251	0.750762	0.170462
	(pCAV1 norm relative to CAV1 norm)	1.05363	0.551787	1.928	0.246069	1.07299	0.116041
		1	0.595938	1.34485	0.456548	1.24907	0.788988
	One-way ANOVA
	Table Analyzed	PP2 pCAV1 / CAV1
	One-way ANOVA	Ordinary
	Alpha	0.05
	Number of families	1
	Number of comparisons per family	5
	Alpha	0.05
	Sidak's multiple comparisons test	Mean Diff,	95,00% CI of diff,	Significant?	Summary	Adjusted P Value
	Ctrl Fc DMSO vs. Ctrl Fc PP2	0.4473	-0,1177 to 1,012	No	ns	0.1542
	B2/Fc DMSO vs. B2/Fc PP2	1.294	0,7285 to 1,859	Yes	****	<0,0001
	B4/Fc DMSO vs. B4/Fc PP2	0.6658	0,1007 to 1,231	Yes	*	0.0186
	Ctrl Fc DMSO vs. B2/Fc DMSO	-0.6715	-1,237 to -0,1064	Yes	*	0.0176
	Ctrl Fc DMSO vs. B4/Fc DMSO	-0.02427	-0,5893 to 0,5408	No	ns	>0,9999
8F	WB:
	Fc stimulation
	PP2 CD36	Ctrl Fc DMSO	Ctrl Fc PP2	B2/Fc DMSO	B2/Fc PP2	B4/Fc DMSO	B4/Fc PP2
	(relative to GAPDH)	0.886839	0.94182	1.31855	0.951784	1.18587	0.763529
		1.11316	1.24776	1.25354	1.11901	0.956177	1.55798
		1	0.865301	0.772979	0.680124	0.67541	0.824212
	One-way ANOVA
	Table Analyzed	PP2 CD36
	One-way ANOVA	Ordinary
	Alpha	0.05
	Number of families	1
	Number of comparisons per family	5
	Alpha	0.05
	Sidak's multiple comparisons test	Mean Diff,	95,00% CI of diff,	Significant?	Summary	Adjusted P Value
	Ctrl Fc DMSO vs. Ctrl Fc PP2	-0.01829	-0,7008 to 0,6642	No	ns	>0,9999
	B2/Fc DMSO vs. B2/Fc PP2	0.1981	-0,4844 to 0,8805	No	ns	0.9186
	B4/Fc DMSO vs. B4/Fc PP2	-0.1094	-0,7919 to 0,5730	No	ns	0.9935
	Ctrl Fc DMSO vs. B2/Fc DMSO	-0.115	-0,7975 to 0,5674	No	ns	0.9918
	Ctrl Fc DMSO vs. B4/Fc DMSO	0.06085	-0,6216 to 0,7433	No	ns	0.9996
