# Supplementary material for: Endothelial EphB4 maintains vascular integrity and transport function in adult heart
Source: eLife. 2019 Nov 29;8:e45863. doi: 10.7554/eLife.45863 (PMC6884395; doi:10.7554/eLife.45863)
Supplement: Figure 8—source data 2. [file elife-45863-fig8-data2.xlsx]

## Sheet: Fig.8D
	Figure 8–source data 2
	Source data for Figure 8D.
	Ratio of pCAV1 / CAV1 in lysates from HUVECs treated with ephrin-B2/Fc in combination with DMSO or inhibitors (LY294002, PP2 and U0126).
8D	WB: pCAV1/CAV1 : B2Fc treated with DMSO or LY294002/U0126/PP2
	LY294002_B2/Fc_pCAV1 / CAV1	B2/Fc DMSO	B2/Fc LY294002
	(pCAV1 norm relative to CAV1 norm)	0.913662	1.49146
		1.08634	1.11066
		1	0.851583
	U0126 _B2/Fc_pCAV1 / CAV1	B2/Fc DMSO	B2/Fc U0126
	(pCAV1 norm relative to CAV1 norm)	1.12136	1.15349
		0.878643	0.969476
		1	1.33622
	PP2 _B2/Fc_pCAV1 / CAV1	B2/Fc DMSO	B2/Fc PP2
	(pCAV1 norm relative to CAV1 norm)	0.949197	0.235042
		1.0508	0.134113
		1	0.339479
	Table Analyzed	LY294002_B2/Fc_pCAV1 / CAV1
	Column B	B2/Fc LY294002
	vs.	vs.
	Column A	B2/Fc DMSO
	Unpaired t test with Welch's correction
	P value	0.5051
	P value summary	ns
	Significantly different (P < 0.05)?	No
	One- or two-tailed P value?	Two-tailed
	Welch-corrected t, df	t=0.7861, df=2.286
	Table Analyzed	U0126 _B2/Fc_pCAV1 / CAV1
	Column B	B2/Fc U0126
	vs.	vs.
	Column A	B2/Fc DMSO
	Unpaired t test with Welch's correction
	P value	0.3037
	P value summary	ns
	Significantly different (P < 0.05)?	No
	One- or two-tailed P value?	Two-tailed
	Welch-corrected t, df	t=1.206, df=3.470
	Table Analyzed	PP2_B2/Fc_pCAV1 / CAV1
	Column B	B2/Fc PP2
	vs.	vs.
	Column A	B2/Fc DMSO
	Unpaired t test with Welch's correction
	P value	0.0016
	P value summary	**
	Significantly different (P < 0.05)?	Yes
	One- or two-tailed P value?	Two-tailed
	Welch-corrected t, df	t=11.55, df=2.924
