# Supplementary material for: Endothelial EphB4 maintains vascular integrity and transport function in adult heart
Source: eLife. 2019 Nov 29;8:e45863. doi: 10.7554/eLife.45863 (PMC6884395; doi:10.7554/eLife.45863)
Supplement: Figure 8—source data 3. [file elife-45863-fig8-data3.xlsx]

## Sheet: Fig.8E
	Figure 8–source data 3
	Source data for Figure 8E.
	Quantitation of pCAV1 immunosignal of HUVECs stimulated with Fc proteins along with inhibitor treatment.
8E	IF_pCAV1	Ctrl-FC DMSO	B2-FC DMSO	B4-FC DMSO	Ctrl-FC LY294002	B2-FC LY294002	B4-FC LY294002	Ctrl-FC PP2	B2-FC PP2	B4-FC PP2	Ctrl-FC U0126	B2-FC U0126	B4-FC U0126
	Fc stimulation + inhibitors	1	1.30425	0.997011	0.952469	1.11771	1.00123	0.587413	0.670779	0.588604	1.13588	1.21283	1.05931
	(Norm. Int. Density)	1	1.36128	0.813001	1.01727	1.01085	1.02862	0.621874	0.764937	0.605383	1.06144	0.994298	0.995215
		1	1.2158	1.0424	0.842213	1.26116	1.13217	0.680687	0.552389	0.644681	1.19168	1.47689	1.28429
	One-way ANOVA
	Table Analyzed	pCav1 Norm. IntDen
	One-way ANOVA	Ordinary
	Alpha	0.05
	Number of families	1
	Number of comparisons per family	7
	Alpha	0.05
	Sidak's multiple comparisons test	Mean Diff,	95,00% CI of diff,	Significant?	Summary	Adjusted P Value
	Ctrl-FC DMSO vs. B2-FC DMSO	-0.2938	-0,4935 to -0,09409	Yes	**	0.0033
	Ctrl-FC DMSO vs. B4-FC DMSO	0.0492	-0,1505 to 0,2489	No	ns	0.9832
	Ctrl-FC PP2 vs. B2-FC PP2	-0.03271	-0,2324 to 0,1670	No	ns	0.9986
	Ctrl-FC PP2 vs. B4-FC PP2	0.0171	-0,1826 to 0,2168	No	ns	>0,9999
	Ctrl-FC DMSO vs. Ctrl-FC PP2	0.37	0,1703 to 0,5697	Yes	***	0.0005
	B2-FC DMSO vs. B2-FC PP2	0.6311	0,4314 to 0,8308	Yes	****	<0,0001
	B4-FC DMSO vs. B4-FC PP2	0.3379	0,1382 to 0,5376	Yes	**	0.001
