# Supplementary material for: Endothelial EphB4 maintains vascular integrity and transport function in adult heart
Source: eLife. 2019 Nov 29;8:e45863. doi: 10.7554/eLife.45863 (PMC6884395; doi:10.7554/eLife.45863)
Supplement: Figure 8—source data 4. [file elife-45863-fig8-data4.xlsx]

## Sheet: Fig.8F
	Figure 8–source data 4
	Source data for Figure 8G.
	Quantitation of normalized CAV1, pCAV1 and pCAV1 / CAV1 in immunoblotted lysates from HUVECs treated with control siControl or siEPHB4 in combination with Ctrl Fc or ephrin-B2/Fc.
8G	WB:
	EPHB4 KD + Ctrl FC/ B2/Fc stimulation
	CAV1	siControl Ctrl Fc	siControl B2/Fc	siEPHB4 B2/Fc
	(relative to GAPDH)	0.859846	0.680877	0.526094
		1.19537	0.694948	0.463746
		0.944786	0.616118	0.603253
	Ordinary one-way ANOVA with Tukey's multiple comparison test
	Table Analyzed	Cav1
	Data sets analyzed	A-C
	ANOVA summary
	F	14.18
	P value	0.0053
	P value summary	**
	Significant diff. among means (P < 0.05)?	Yes
	R square	0.8254
	Number of families	1
	Number of comparisons per family	3
	Alpha	0.05
	Tukey's multiple comparisons test	Mean Diff.	95.00% CI of diff.	Significant?	Summary	Adjusted P Value
	siControl Ctrl Fc vs. siControl B2/Fc	0.336	0.05749 to 0.6145	Yes	*	0.0235
	siControl Ctrl Fc vs. siEPHB4 B2/Fc	0.469	0.1904 to 0.7475	Yes	**	0.005
	siControl B2/Fc vs. siEPHB4 B2/Fc	0.133	-0.1456 to 0.4115	No	ns	0.3703
8G	WB:
	EPHB4 KD + Ctrl FC/ B2/Fc stimulation
	pCAV1	siControl Ctrl Fc	siControl B2/Fc	siEPHB4 B2/Fc
	(relative to GAPDH)	1.01105	1.38486	0.931497
		0.874561	1.68999	1.07223
		1.11439	1.86108	0.831768
	Ordinary one-way ANOVA with Tukey's multiple comparison test
	Table Analyzed	pCav1
	Data sets analyzed	A-C
	ANOVA summary
	F	15.64
	P value	0.0042
	P value summary	**
	Significant diff. among means (P < 0.05)?	Yes
	R square	0.839
	Number of families	1
	Number of comparisons per family	3
	Alpha	0.05
	Tukey's multiple comparisons test	Mean Diff.	95.00% CI of diff.	Significant?	Summary	Adjusted P Value
	siControl Ctrl Fc vs. siControl B2/Fc	-0.6453	-1.073 to -0.2180	Yes	**	0.0085
	siControl Ctrl Fc vs. siEPHB4 B2/Fc	0.05484	-0.3724 to 0.4821	No	ns	0.9192
	siControl B2/Fc vs. siEPHB4 B2/Fc	0.7001	0.2729 to 1.127	Yes	**	0.0057
8G	WB:
	EPHB4 KD + Ctrl FC/ B2/Fc stimulation
	pCAV1/ CAV1	siControl Ctrl Fc	siControl B2/Fc	siEPHB4 B2/Fc
	(pCAV1 norm relative to CAV1 norm)	1.14272	1.97662	1.7207
		0.711008	2.3633	2.24695
		1.14628	2.93553	1.33995
	Ordinary one-way ANOVA with Tukey's multiple comparison test
	Table Analyzed	pCav1/Cav1
	Data sets analyzed	A-C
	ANOVA summary
	F	9.108
	P value	0.0152
	P value summary	*
	Significant diff. among means (P < 0.05)?	Yes
	R square	0.7522
	Number of families	1
	Number of comparisons per family	3
	Alpha	0.05
	Tukey's multiple comparisons test	Mean Diff.	95.00% CI of diff.	Significant?	Summary	Adjusted P Value
	siControl Ctrl Fc vs. siControl B2/Fc	-1.425	-2.451 to -0.3995	Yes	*	0.0125
	siControl Ctrl Fc vs. siEPHB4 B2/Fc	-0.7692	-1.795 to 0.2564	No	ns	0.1316
	siControl B2/Fc vs. siEPHB4 B2/Fc	0.656	-0.3697 to 1.682	No	ns	0.2023
