# Supplementary material for: Endothelial EphB4 maintains vascular integrity and transport function in adult heart
Source: eLife. 2019 Nov 29;8:e45863. doi: 10.7554/eLife.45863 (PMC6884395; doi:10.7554/eLife.45863)
Supplement: Figure 9—figure supplement 1—source data 1. [file elife-45863-fig9-figsupp1-data1.xlsx]

## Sheet: Fig.9-figure supplement 1
	Figure 9–figure supplement 1–source data 1
	Source data for Figure 9–figure supplement 1A, C, F, G.
	Quantitation of BSA-555, Transferrin-488 and BODIPY C12-500/510 uptake by FACS in HUVECs treated with siControl and siEPHB4. Quantitation of Transferrin-488 uptake in HUVECs treated with siControl, siEPHB4 or siCAV1.
9/S1A	FACS BSA mean fluorescence intensity					9/S1C	FACS Transferrin mean fluorescence intensity
		siControl	siEPHB4					siControl	siEPHB4
			0.904191						0.767278
		0.987486	0.924055					1.09233	1.0498
		1.01311	0.941866					0.986004	1.01074
		0.993975	0.931206					0.97906	0.936964
		1.00543	0.966762					0.942606	1.04763
	Table Analyzed	Figure 9–figure supplement 1 BSA					Table Analyzed	Figure 9–figure supplement 1 Transferrin
	Column B	siEPHB4					Column B	siEPHB4
	vs.	vs,					vs.	vs,
	Column A	siControl					Column A	siControl
	Unpaired t test with Welch's correction						Unpaired t test with Welch's correction
	P value	0.0013					P value	0.5657
	P value summary	**					P value summary	ns
	Significantly different (P < 0.05)?	Yes					Significantly different (P < 0.05)?	No
	One- or two-tailed P value?	Two-tailed					One- or two-tailed P value?	Two-tailed
	Welch-corrected t, df	t=5,624, df=6,078					Welch-corrected t, df	t=0,6058, df=6,352
	Mean of column A	1					Mean of column A	1
	Mean of column B	0.9336					Mean of column B	0.9625
	Difference between means (B - A) ± SEM	-0,06638 ± 0,01180					Difference between means (B - A) ± SEM	-0,03752 ± 0,06193
	95% confidence interval	-0,09518 to -0,03759					95% confidence interval	-0,1870 to 0,1120
	R squared (eta squared)	0.8388					R squared (eta squared)	0.05461
9/S1G	FACS BODIPY mean fluorescence intensity					9/S1F	IF:
		siControl	siEPHB4				siCtrl, siEPHB4	siControl	siEPHB4
		0.995586	0.790767				Transferrin uptake MFI	1	0.737879
		1.0283	0.8916					1	0.850511
		1.13544	0.780848					1	0.877379
		1.008	0.814415
		0.832676	0.80581
	Table Analyzed	Figure 9–figure supplement 1 Bodipy					Table Analyzed	Figure 9–figure supplement 1 Transferrin MFI
	Column B	siEPHB4					Column B	siEPHB4
	vs.	vs,					vs.	vs,
	Column A	siControl					Column A	siControl
	Unpaired t test with Welch's correction						Unpaired t test with Welch's correction
	P value	0.0159					P value	0.053
	P value summary	*					P value summary	ns
	Significantly different (P < 0.05)?	Yes					Significantly different (P < 0.05)?	No
	One- or two-tailed P value?	Two-tailed					One- or two-tailed P value?	Two-tailed
	Welch-corrected t, df	t=3,498, df=5,269					Welch-corrected t, df	t=4,167, df=2,000
	Mean of column A	1					How big is the difference?
	Mean of column B	0.8167					Mean of column A	1
	Difference between means (B - A) ± SEM	-0,1833 ± 0,05240					Mean of column B	0.8219
	95% confidence interval	-0,3160 to -0,05066					Difference between means (B - A) ± SEM	-0,1781 ± 0,04273
	R squared (eta squared)	0.699					95% confidence interval	-0,3619 to 0,005784
							R squared (eta squared)	0.8967
							F test to compare variances
							F, DFn, Dfd	Infinity, 2, 2
							P value	<0,0001
							P value summary	****
							Significantly different (P < 0.05)?	Yes
							Data analyzed
							Sample size, column A	3
							Sample size, column B	3
