# Supplementary material for: Endothelial EphB4 maintains vascular integrity and transport function in adult heart
Source: eLife. 2019 Nov 29;8:e45863. doi: 10.7554/eLife.45863 (PMC6884395; doi:10.7554/eLife.45863)
Supplement: Figure 9—figure supplement 2—source data 1. [file elife-45863-fig9-figsupp2-data1.xlsx]

## Sheet: Fig.9-figure supplement 2
	Figure 9–figure supplement 2–source data 1
	Source data for Figure 9–figure supplement 2A.
	Analysis of glucose concentration, triglyceride and free fatty acids in plasma from Ephb4∆EC mutants and controls mice.
9/S2A	Glucose (mg/dl)				9/S2A	Triglyceride (mg/dl)
		Control	Ephb4ΔEC				Control	Ephb4ΔEC
			289					289
			257					257
			264					264
		324	276				324	276
		311	257				311	257
		381	267				381	267
		360	343				360	343
	Table Analyzed	Figure 9–figure supplement 2 Glucose				Table Analyzed	Figure 9–figure supplement 2 Triglyceride
	Column B	Ephb4ΔEC				Column B	Ephb4ΔEC
	vs.	vs,				vs.	vs,
	Column A	Control				Column A	Control
	Unpaired t test with Welch's correction					Unpaired t test with Welch's correction
	P value	0.0165				P value	0.558
	P value summary	*				P value summary	ns
	Significantly different (P < 0.05)?	Yes				Significantly different (P < 0.05)?	No
	One- or two-tailed P value?	Two-tailed				One- or two-tailed P value?	Two-tailed
	Welch-corrected t, df	t=3,285, df=6,045				Welch-corrected t, df	t=0,6472, df=3,451
	Mean of column A	344				Mean of column A	106.3
	Mean of column B	279				Mean of column B	97.86
	Difference between means (B - A) ± SEM	-65,00 ± 19,79				Difference between means (B - A) ± SEM	-8,393 ± 12,97
	95% confidence interval	-113,3 to -16,67				95% confidence interval	-46,77 to 29,98
	R squared (eta squared)	0.641				R squared (eta squared)	0.1082
9/S2A	Free fatty acids (nmol/l)
		Control	Ephb4ΔEC
			1.058
			1.015
			0.836
		0.928	1.214
		1.307	1.255
		1.34	0.922
		1.644	1.267
	Table Analyzed	Figure 9–figure supplement 2 Free Fatty Acids
	Column B	Ephb4ΔEC
	vs.	vs,
	Column A	Control
	Unpaired t test with Welch's correction
	P value	0.2319
	P value summary	ns
	Significantly different (P < 0.05)?	No
	One- or two-tailed P value?	Two-tailed
	Welch-corrected t, df	t=1,397, df=4,180
	Mean of column A	1.305
	Mean of column B	1.081
	Difference between means (B - A) ± SEM	-0,2238 ± 0,1601
	95% confidence interval	-0,6609 to 0,2134
	R squared (eta squared)	0.3184
