# Supplementary material for: Endothelial EphB4 maintains vascular integrity and transport function in adult heart
Source: eLife. 2019 Nov 29;8:e45863. doi: 10.7554/eLife.45863 (PMC6884395; doi:10.7554/eLife.45863)
Supplement: Figure 9—source data 1. [file elife-45863-fig9-data1.xlsx]

## Sheet: Fig.9
	Figure 9–source data 1
	Source data for Figure 9C.
	Quantitation of BSA-555 and BODIPY C12-500/510 uptake in HUVECs treated with siControl, siEPHB4 or siCAV1.
9C	IF:							9C	IF:
	siControl, siEPHB4, siCAV1	siControl	siEPHB4	siCAV1					siControl, siEPHB4, siCAV1	siControl	siEPHB4	siCAV1
	BSA uptake MFI	1	0.768032	0.789205					BODIPY uptake MFI	1	0.568846	0.730756
		1	0.696554	0.647232						1	0.600627	0.662434
		1	0.503025	0.489457						1	0.482349	0.597379
	Ordinary one-way ANOVA with Sidak's multiple comparison test								Ordinary one-way ANOVA with Sidak's multiple comparison test
	Table Analyzed	BSA MFI							Table Analyzed	BODIPY MFI
	Data sets analyzed	A-C							Data sets analyzed	A-C
	ANOVA summary								ANOVA summary
	F	8.968							F	60.02
	P value	0.0158							P value	0.0001
	P value summary	*							P value summary	***
	Significant diff. among means (P < 0.05)?	Yes							Significant diff. among means (P < 0.05)?	Yes
	R square	0.7493							R square	0.9524
	Number of families	1							Number of families	1
	Number of comparisons per family	2							Number of comparisons per family	2
	Alpha	0.05							Alpha	0.05
	Dunnett's multiple comparisons test	Mean Diff,	95,00% CI of diff,	Significant?	Summary	Adjusted P Value			Dunnett's multiple comparisons test	Mean Diff,	95,00% CI of diff,	Significant?	Summary	Adjusted P Value
	siControl vs. siEPHB4	0.3441	0,06991 to 0,6184	Yes	*	0.0203			siControl vs. siEPHB4	0.4494	0,3272 to 0,5716	Yes	****	<0,0001
	siControl vs. siCAV1	0.358	0,08381 to 0,6323	Yes	*	0.0171			siControl vs. siCAV1	0.3365	0,2143 to 0,4587	Yes	***	0.0004
