# Supplementary material for: Endothelial EphB4 maintains vascular integrity and transport function in adult heart
Source: eLife. 2019 Nov 29;8:e45863. doi: 10.7554/eLife.45863 (PMC6884395; doi:10.7554/eLife.45863)
Supplement: Figure 10—source data 1. [file elife-45863-fig10-data1.xlsx]

## Sheet: Fig.10
	Figure 10–source data 1
	Source data for Figure 10C, D.
	Quantitation of relative colocalization of Vinculin and CDH5 and of the empty area between siControl and siEPHB4 HUVECs in static conditions or with stretching. Quantitation of Young’s modulus is reduced in siControl and siEPHB4 HUVECs.
10C	Relative Vinculin/Cdh5 colocalization (voxels)					10C	Empty area (pixels)
		siControl	siEPHB4					siControl-static	siEPHB4-static	siControl-stretching	siEPHB4- stretching
			0.16317					5.66667	11.5	219	2954.67
			0.393009					10	0.75	360.333	2115.5
		1	0.516442					12.3333	1.66667	201.667	2025
		1.05624	0.796078
		0.943756	0.846238
	Table Analyzed	Fig.10 Relative Vinculin/Cdh5 colocalization (voxels)					Table Analyzed	Fig.10 empty area (pixels)
							Data sets analyzed	A-D
	Column B	siEPHB4
	vs.	vs,					One-way ANOVA	ordinary
	Column A	siControl					ANOVA summary
							F	57.99
	Unpaired t test with Welch's correction						P value	<0,0001
	P value	0.0209					P value summary	****
	P value summary	*					Significant diff. among means (P < 0.05)?	Yes
	Significantly different (P < 0.05)?	Yes					R square	0.956
	One- or two-tailed P value?	Two-tailed
	Welch-corrected t, df	t=3,482, df=4,500
	Mean of column A	1					Number of families	1
	Mean of column B	0.543					Number of comparisons per family	3
	Difference between means (B - A) ± SEM	-0,4570 ± 0,1313					Alpha	0.05
	95% confidence interval	-0,8060 to -0,1080
	R squared (eta squared)	0.7293					Sidak's multiple comparisons test	Mean Diff,	95,00% CI of diff,	Significant?	Summary	Adjusted P Value
							siControl-static vs. siEPHB4-static	4.694	-633,2 to 642,5	No	ns	>0,9999
							siControl-static vs. siControl-stretching	-251	-888,8 to 386,8	No	ns	0.6126
10D	Young's modulus (Pa)						siControl-stretching vs. siEPHB4- stretching	-2105	-2743 to -1467	Yes	****	<0,0001
		siControl	siEPHB4
		3852	1551.01
		3968.95	1775.73
		3551.58	1707.12
		3954.32	2013.32
	Table Analyzed	Fig.10 Young's Modulus (Pa)
	Column B	siEPHB4
	vs.	vs,
	Column A	siControl
	Unpaired t test with Welch's correction
	P value	<0,0001
	P value summary	****
	Significantly different (P < 0.05)?	Yes
	One- or two-tailed P value?	Two-tailed
	Welch-corrected t, df	t=15,16, df=6,000
	Mean of column A	3832
	Mean of column B	1762
	Difference between means (B - A) ± SEM	-2070 ± 136,5
	95% confidence interval	-2404 to -1736
	R squared (eta squared)	0.9746
